# Supplementary material
Source: publisher figshare collection journal article supplement (https://acs.figshare.com/ndownloader/files/23757611)
Supplement: Supplementary file 1 [file 23757611]

# Supporting Information

## Silver-Catalyzed C—H Aryloxydifluoromethylation and Arylthiodifluoromethylation of Heteroarenes

Xiao-Lei Zhu,<sup>†</sup> Yangen Huang,<sup>†</sup> Xiu-Hua Xu,<sup>‡</sup> and Feng-Ling Qing\*,<sup>†,‡</sup>

<sup>†</sup> College of Chemistry, Chemical Engineering and Biotechnology, Donghua University, 2999  
North Renmin Lu, Shanghai 201620, China

<sup>‡</sup> Key Laboratory of Organofluorine Chemistry, Center for Excellence in Molecular Synthesis,  
Shanghai Institute of Organic Chemistry, University of Chinese Academy of Science, Chinese  
Academy of Science, 345 Lingling Lu, Shanghai 200032, China

E-mail: [flq@mail.sioc.ac.cn](mailto:flq@mail.sioc.ac.cn)

### Contents

|                                                                                                      |     |
|------------------------------------------------------------------------------------------------------|-----|
| 1. General Information.....                                                                          | S2  |
| 2. Preparation of ArOCF <sub>2</sub> CO <sub>2</sub> H and ArSCF <sub>2</sub> CO <sub>2</sub> H..... | S3  |
| 3. Screening of the Solvents.....                                                                    | S4  |
| 4. General Procedures for Aryloxydifluoromethylation of Heteroarenes.....                            | S5  |
| 5. General Procedures for Arylthiodifluoromethylation of Heteroarenes.....                           | S15 |
| 6. Scale-up Experiments.....                                                                         | S22 |
| 7. Competition Experiments.....                                                                      | S23 |
| 8. Radical Inhibition Experiments.....                                                               | S25 |
| 9. ORTEP Drawing of the X-Ray Crystallographic Structure of Product 5kc..                            | S27 |
| 10. Copies of <sup>1</sup> H, <sup>19</sup> F, and <sup>13</sup> C NMR Spectra for the Products..... | S29 |
| 11. Copies of HRMS Analysis Reports for the Products.....                                            | S80 |

## 1. General Information

$^1\text{H}$  NMR (TMS as the internal standard) were recorded on a Bruker AM 400 or 600 spectrometer,  $^{13}\text{C}$  NMR and  $^{19}\text{F}$  NMR ( $\text{CFCl}_3$  as outside standard and low field is positive) spectra were recorded on a Bruker AM 400 or 600 spectrometer. For the determination of  $^{19}\text{F}$  NMR yield,  $\text{PhCF}_3$  was used as an internal standard and the relaxation delay (d1) was set to 5 s. Chemical shifts ( $\delta$ ) were reported in per million (ppm), and coupling constants ( $J$ ) were in Hertz (Hz). The following abbreviations were used to explain the multiplicities: s = singlet, d = doublet, t = triplet, q = quartet, m = multiplet. High resolution mass spectra (HRMS) were obtained on a GC-TOF mass spectrometer.

**Materials:** Unless otherwise noted, all reagents were obtained commercially and used without further purification. Substrates were purchased from commercial sources or prepared according to literature procedures. Reactions were performed using glassware that was flame-dried under vacuum.

## 2. Preparation of ArOCF<sub>2</sub>CO<sub>2</sub>H and ArSCF<sub>2</sub>CO<sub>2</sub>H

### Preparation of BrCF<sub>2</sub>COONa.

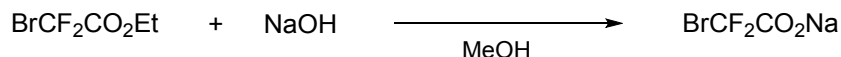

To a 500 mL oven-dried round-bottom flask equipped with a stir bar were added sodium hydroxide (8.0 g, 200 mmol) and MeOH (180 mL). Then, BrCF<sub>2</sub>CO<sub>2</sub>Et (41.0 g, 202 mmol) was added to the resulting solution at 0 °C. Upon addition, the mixture was warmed to room temperature and stirred for 24 h. The solvent was evaporated under vacuum and the residue was further dried under reduced pressure to give BrCF<sub>2</sub>CO<sub>2</sub>Na as a white solid (39.1 g, 99%).

### General Procedures for the Synthesis of Aryloxydifluoroacetic acid (ArOCF<sub>2</sub>CO<sub>2</sub>H) and Arylthiodifluoroacetic acid (ArSCF<sub>2</sub>CO<sub>2</sub>H).

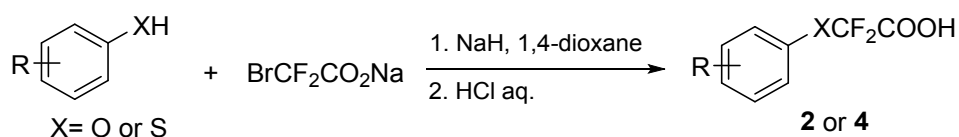

ArOCF<sub>2</sub>CO<sub>2</sub>H and ArSCF<sub>2</sub>CO<sub>2</sub>H were prepared following the reported procedures (Zhou, M.; Ni, C.; He, Z.; Hu, J. *Org. Lett.* **2016**, *18*, 3754). To a 50 mL oven-dried Schlenk tube equipped with a stir bar was added phenol (3.0 mmol, 1.0 equiv) or thiophenol (3.0 mmol, 1.0 equiv) under N<sub>2</sub> atmosphere. 1,4-Dioxane (10.0 mL) was added to dissolve the phenol or thiophenol. Then, NaH (60% purity) (132.0 mg, 3.3 mmol, 1.1 equiv) and 1,4-dioxane (2.0 mL) were added under N<sub>2</sub> atmosphere. The solution was stirred at room temperature for 30 min. Then BrCF<sub>2</sub>COONa (647.1 mg, 3.3 mmol, 1.1 equiv) and 1,4-dioxane (3.0 mL) were added. After the mixture was heated at 60-100 °C in an oil bath for hours (monitor by TLC), then the mixture was cooled down to room temperature and acidified with 3M HCl (aq) to pH = 1. The mixture was extracted with ethyl acetate for three times. The combined organic phase was washed by saturated brines and dried over MgSO<sub>4</sub>. After the solution was filtered and the solvent was evaporated under vacuum, the crude product was purified by flash column chromatography using petroleum ether and ethyl acetate as eluent to give the product **2** or **4**.

### 3. Screening of the Solvents<sup>a</sup>

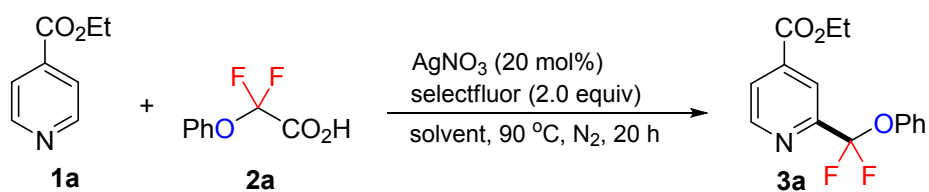

| entry | solvent                             | yield (%) <sup>b</sup> |
|-------|-------------------------------------|------------------------|
| 1     | DCE                                 | 0                      |
| 2     | $\text{H}_2\text{O}$                | 50                     |
| 3     | MeCN                                | 0                      |
| 4     | DMSO                                | 0                      |
| 5     | DCE/ $\text{H}_2\text{O}$ (1:1)     | 78                     |
| 6     | toluene/ $\text{H}_2\text{O}$ (1:1) | 60                     |
| 7     | MeCN/ $\text{H}_2\text{O}$ (1:1)    | 6                      |
| 8     | MeOH/ $\text{H}_2\text{O}$ (1:1)    | 0                      |
| 9     | DMSO/ $\text{H}_2\text{O}$ (1:1)    | 0                      |
| 10    | DCE/ $\text{H}_2\text{O}$ (2:1)     | 73                     |
| 11    | DCE/ $\text{H}_2\text{O}$ (1:2)     | 59                     |

<sup>a</sup>Reaction conditions: **1a** (0.2 mmol), **2a** (0.6 mmol),  $\text{AgNO}_3$  (0.04 mmol), selectfluor (0.4 mmol), solvent (2.0 mL),  $\text{N}_2$ , 90 °C, 20 h. <sup>b</sup>Yields were determined by  $^{19}\text{F}$  NMR spectroscopy using trifluoromethoxybenzene as an internal standard.

## 4. General Procedures for Aryloxydifluoromethylation of Heteroarenes

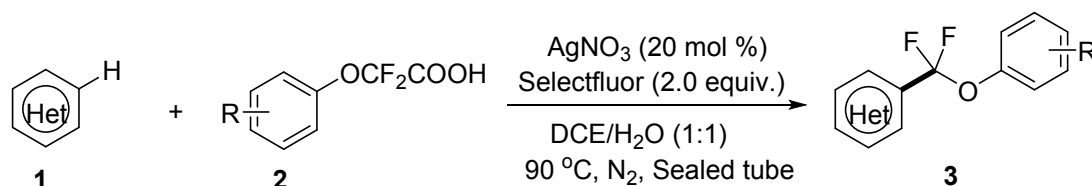

To a sealed tube equipped with a stir bar were added **1** (0.6 mmol, 1.0 equiv),  $\text{AgNO}_3$  (20.4 mg, 0.12 mmol, 20 mol%), and selectfluor (425.1 mg, 1.2 mmol, 2.0 equiv). The tube was evacuated and backfilled with pure  $\text{N}_2$  for three times. Then aryloxydifluoroacetic acid **2** (1.8 mmol, 3.0 equiv) in DCE/ $\text{H}_2\text{O}$  (3.0/3.0 mL) were added. The tube was sealed and the mixture was heated at 90 °C in an oil bath for 20 h. After the reaction was complete, saturated  $\text{NaHCO}_3$  solution was added. The resulting mixture was extracted with ethyl acetate for three times. The combined organic layer was washed with brine, dried over anhydrous  $\text{Na}_2\text{SO}_4$ , and concentrated under reduced pressure. The resulting residue was purified by silica gel flash column chromatography to give the product **3**.

### Ethyl 2-(difluoro(phenoxy)methyl)isonicotinate (**3a**)

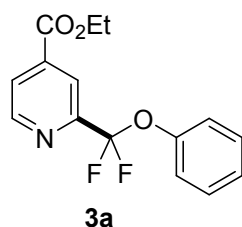

The product mixture was purified by silica gel column chromatography (hexane/ $\text{EtOAc}$  = 10:1) to afford **3a** (105.5 mg, 60%) as a yellowish liquid.  $^1\text{H}$  NMR (400 MHz,  $\text{CDCl}_3$ )  $\delta$  ppm 8.78 (d,  $J$  = 4.9 Hz, 1H), 8.24 (s, 1H), 7.90 (dd,  $J$  = 4.9, 1.3 Hz, 1H), 7.28-7.20 (m, 4H), 7.14-7.06 (m, 1H), 4.33 (q,  $J$  = 7.1 Hz, 2H), 1.30 (t,  $J$  = 7.1 Hz, 3H);  $^{19}\text{F}$  NMR (377 MHz,  $\text{CDCl}_3$ )  $\delta$  ppm -70.26 (s, 2F);  $^{13}\text{C}$  NMR (101 MHz,  $\text{CDCl}_3$ )  $\delta$  ppm 163.1, 151.1 (t,  $J$  = 34.3 Hz), 149.5, 149.1, 138.2, 128.4, 124.9, 123.9, 121.1, 119.2 (t,  $J$  = 2.8 Hz), 118.6 (t,  $J$  = 264.6 Hz), 114.4, 61.2, 13.1; IR (thin film)  $\nu$  1728, 1592, 1491, 1326, 1249, 1150, 1055, 897, 762, 689  $\text{cm}^{-1}$ ; MS (ESI):  $m/z$  294  $[\text{M}+\text{H}]^+$ ; HRMS (ESI)  $m/z$ :  $[\text{M}+\text{H}]^+$  Calcd. for  $\text{C}_{15}\text{H}_{14}\text{F}_2\text{NO}_3$  294.0936; Found 294.0934.

**2-(Difluoro(phenoxy)methyl)isonicotinonitrile****(3b),****3-(Difluoro(phenoxy)methyl)isonicotinonitrile (3b')**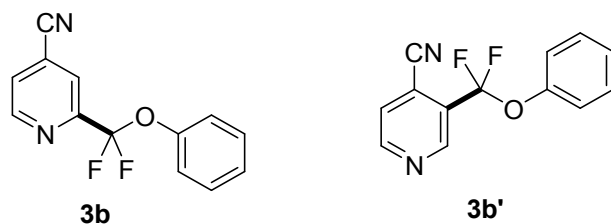

The product mixture was purified by silica gel column chromatography (hexane/EtOAc = 8:1) to afford **3b** (69.3 mg, 47%) and **3b'** (35.4 mg, 24%) as yellowish liquids.

**3b:**  $^1\text{H NMR}$  (400 MHz,  $\text{CDCl}_3$ )  $\delta$  ppm 8.96 (d,  $J = 4.9$  Hz, 1H), 8.05 (s, 1H), 7.71 (d,  $J = 4.8$  Hz, 1H), 7.42-7.38 (m, 2H), 7.32-7.27 (m, 3H);  $^{19}\text{F NMR}$  (377 MHz,  $\text{CDCl}_3$ )  $\delta$  ppm -70.49 (s, 2F);  $^{13}\text{C NMR}$  (101 MHz,  $\text{CDCl}_3$ )  $\delta$  ppm 152.7 (t,  $J = 35.1$  Hz), 150.8, 149.8, 129.6, 127.3, 126.3, 122.8 (t,  $J = 2.9$  Hz), 122.0, 118.9 (t,  $J = 265.1$  Hz), 115.7; **IR** (thin film)  $\nu$  1592, 1491, 1415, 1321, 1199, 1153, 1056, 854, 739, 688  $\text{cm}^{-1}$ ; **MS** (ESI):  $m/z$  247  $[\text{M}+\text{H}]^+$ ; **HRMS** (ESI)  $m/z$ :  $[\text{M}+\text{H}]^+$  Calcd. for  $\text{C}_{13}\text{H}_9\text{F}_2\text{N}_2\text{O}$  247.0677; Found 247.0673.

**3b':**  $^1\text{H NMR}$  (400 MHz,  $\text{CDCl}_3$ )  $\delta$  ppm 9.22 (s, 1H), 8.99 (d,  $J = 4.8$  Hz, 1H), 7.75 (d,  $J = 4.8$  Hz, 1H), 7.45-7.39 (m, 3H), 7.35-7.23 (m, 2H);  $^{19}\text{F NMR}$  (377 MHz,  $\text{CDCl}_3$ )  $\delta$  ppm -65.94 (s, 2F);  $^{13}\text{C NMR}$  (101 MHz,  $\text{CDCl}_3$ )  $\delta$  ppm 152.8, 149.6, 147.9 (t,  $J = 5.3$  Hz), 129.7, 127.0, 126.6, 122.2, 119.8 (t,  $J = 265.0$  Hz), 119.1, 114.1; **IR** (thin film)  $\nu$  1589, 1490, 1278, 1190, 1138, 1060, 837, 739, 687  $\text{cm}^{-1}$ ; **MS** (ESI):  $m/z$  247  $[\text{M}+\text{H}]^+$ ; **HRMS** (ESI)  $m/z$ :  $[\text{M}+\text{H}]^+$  Calcd. for  $\text{C}_{13}\text{H}_9\text{F}_2\text{N}_2\text{O}$  247.0677; Found 247.0672.

**1-(2-(Difluoro(phenoxy)methyl)pyridin-4-yl)ethan-1-one****(3c),****1-(3-(Difluoro(phenoxy)methyl)pyridin-4-yl)ethan-1-one (3c')**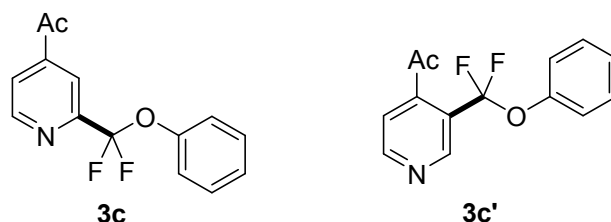

The product mixture was purified by silica gel column chromatography (hexane/EtOAc = 5:1) to afford **3c** (88.4 mg, 56%) as a yellowish solid and **3c'** (28.4 mg, 18%) as a yellowish liquid.

**3c**: m.p. 57-59 °C;  $^1\text{H}$  NMR (400 MHz,  $\text{CDCl}_3$ )  $\delta$  ppm 8.84 (d,  $J = 4.9$  Hz, 1H), 8.13 (s, 1H), 7.80 (d,  $J = 4.9$  Hz, 1H), 7.31-7.27 (m, 2H), 7.23 (d,  $J = 8.0$  Hz, 2H), 7.18-7.15 (m, 1H), 2.59 (s, 3H);  $^{19}\text{F}$  NMR (377 MHz,  $\text{CDCl}_3$ )  $\delta$  ppm -70.26 (s, 2F);  $^{13}\text{C}$  NMR (101 MHz,  $\text{CDCl}_3$ )  $\delta$  ppm 195.2, 151.6 (t,  $J = 34.3$  Hz), 149.9, 149.1, 143.1, 128.5, 125.0, 122.3, 121.1, 118.6 (t,  $J = 264.7$  Hz), 117.5 (t,  $J = 2.8$  Hz), 25.7; IR (thin film)  $\nu$  1696, 1588, 1489, 1323, 1239, 1165, 1053, 855, 748, 688  $\text{cm}^{-1}$ ; MS (ESI):  $m/z$  264  $[\text{M}+\text{H}]^+$ ; HRMS (ESI)  $m/z$ :  $[\text{M}+\text{H}]^+$  Calcd. for  $\text{C}_{14}\text{H}_{12}\text{F}_2\text{NO}_2$  264.0831; Found 264.0825.

**3c'**:  $^1\text{H}$  NMR (400 MHz,  $\text{CDCl}_3$ )  $\delta$  ppm 9.00 (s, 1H), 8.78 (s, 1H), 7.34-7.30 (m, 2H), 7.22-7.18 (m, 4H), 2.53 (s, 3H).  $^{19}\text{F}$  NMR (377 MHz,  $\text{CDCl}_3$ )  $\delta$  ppm -61.73 (s, 2F).  $^{13}\text{C}$  NMR (101 MHz,  $\text{CDCl}_3$ )  $\delta$  ppm 199.9, 151.6, 148.6, 147.1 (t,  $J = 5.0$  Hz), 146.9, 128.6, 125.3, 120.9, 119.9 (t,  $J = 264.7$  Hz), 118.7, 29.9. IR (thin film)  $\nu$  1712, 1591, 1491, 1325, 1283, 1190, 1049, 1026, 732, 688  $\text{cm}^{-1}$ ; MS (ESI):  $m/z$  264  $[\text{M}+\text{H}]^+$ ; HRMS (ESI)  $m/z$ :  $[\text{M}+\text{H}]^+$  Calcd. for  $\text{C}_{14}\text{H}_{12}\text{F}_2\text{NO}_2$  264.0831; Found 264.0825.

#### 4-(*Tert*-butyl)-2-(difluoro(phenoxy)methyl)pyridine (**3d**)

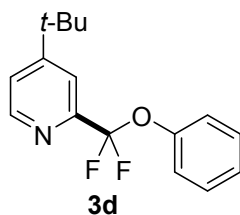

The product mixture was purified by silica gel column chromatography (hexane/EtOAc = 10:1) to afford **3d** (69.9 mg, 42%) as a yellowish solid. m.p. 54-56 °C;  $^1\text{H}$  NMR (400 MHz,  $\text{CDCl}_3$ )  $\delta$  ppm 8.65 (d,  $J = 5.2$  Hz, 1H), 7.77 (s, 1H), 7.41 (dd,  $J = 5.2, 1.8$  Hz, 1H), 7.38-7.32 (m, 4H), 7.24-7.20 (m, 1H), 1.33 (s, 9H);  $^{19}\text{F}$  NMR (377 MHz,  $\text{CDCl}_3$ )  $\delta$  ppm -70.30 (s, 2F);  $^{13}\text{C}$  NMR (101 MHz,  $\text{CDCl}_3$ )  $\delta$  ppm 161.8, 151.1 (t,  $J = 33.1$  Hz), 150.4, 149.6, 129.4, 125.8, 122.6, 122.3, 120.2 (t,  $J = 264.5$  Hz), 117.8 (t,  $J = 2.9$  Hz), 35.0, 30.4; IR (thin film)  $\nu$  1777, 1592, 1491, 1324, 1259, 1161, 1051, 869, 733, 688  $\text{cm}^{-1}$ ; MS (ESI):  $m/z$  278  $[\text{M}+\text{H}]^+$ ; HRMS (ESI)  $m/z$ :  $[\text{M}+\text{H}]^+$  Calcd. for  $\text{C}_{16}\text{H}_{18}\text{F}_2\text{NO}$  278.1351; Found 278.1345.

#### 2-(Difluoro(phenoxy)methyl)-4-phenylpyridine (**3e**)

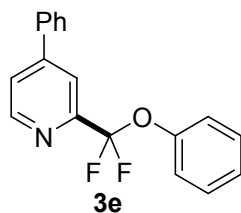

The product mixture was purified by silica gel column chromatography (hexane/EtOAc = 10:1) to afford **3e** (67.7 mg, 38%) as a yellowish liquid. **<sup>1</sup>H NMR** (400 MHz, CDCl<sub>3</sub>) δ ppm 8.79 (d, *J* = 5.1 Hz, 1H), 8.01 (s, 1H), 7.69-7.64 (m, 3H), 7.54-7.46 (m, 3H), 7.40-7.34 (m, 4H), 7.27-7.22 (m, 1H); **<sup>19</sup>F NMR** (377 MHz, CDCl<sub>3</sub>) δ ppm -70.31 (s, 2F); **<sup>13</sup>C NMR** (101 MHz, CDCl<sub>3</sub>) δ ppm 151.9 (t, *J* = 33.5 Hz), 150.3, 150.2, 150.0, 137.3, 129.7, 129.5, 129.3, 127.2, 125.9, 123.5, 122.2, 120.1 (t, *J* = 264.6 Hz), 118.9 (t, *J* = 2.8 Hz); **IR** (thin film) ν 1602, 1490, 1413, 1330, 1256, 1147, 1048, 849, 760, 688 cm<sup>-1</sup>; **MS** (ESI): *m/z* 298 [M+H]<sup>+</sup>; **HRMS** (ESI) *m/z*: [M+H]<sup>+</sup> Calcd. for C<sub>18</sub>H<sub>14</sub>F<sub>2</sub>NO 298.1038; Found 298.1035.

### 2-(Difluoro(phenoxy)methyl)-6,7-dihydro-5H-cyclopenta[*b*]pyridine (**3f**)

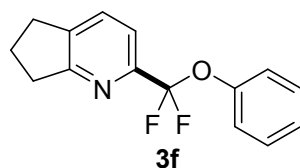

The product mixture was purified by silica gel column chromatography (hexane/EtOAc = 8:1) to afford **3f** (84.6 mg, 54%) as a yellowish liquid. **<sup>1</sup>H NMR** (400 MHz, CDCl<sub>3</sub>) δ ppm 8.39 (d, *J* = 5.1 Hz, 1H), 7.30-7.26 (m, 3H), 7.17-7.13 (m, 3H), 3.12 (t, *J* = 7.5 Hz, 2H), 2.99 (t, *J* = 7.8 Hz, 2H), 2.11-2.04 (m, 2H); **<sup>19</sup>F NMR** (377 MHz, CDCl<sub>3</sub>) δ ppm -67.86 (s, 2F); **<sup>13</sup>C NMR** (101 MHz, CDCl<sub>3</sub>) δ ppm 167.8, 150.1, 148.2, 137.4 (t, *J* = 33.2 Hz), 134.2, 129.5, 125.9, 121.8, 121.3 (t, *J* = 264.3 Hz), 117.0 (t, *J* = 4.4 Hz), 34.1, 30.0, 22.7; **IR** (thin film) ν 1593, 1491, 1393, 1305, 1203, 1139, 1204, 1140, 1044, 831, 732, 689 cm<sup>-1</sup>; **MS** (ESI): *m/z* 262 [M+H]<sup>+</sup>; **HRMS** (ESI) *m/z*: [M+H]<sup>+</sup> Calcd. for C<sub>15</sub>H<sub>14</sub>F<sub>2</sub>NO 262.1038; Found 262.1036.

### 3-(Difluoro(phenoxy)methyl)-2,6-dimethylpyridine (**3g**)

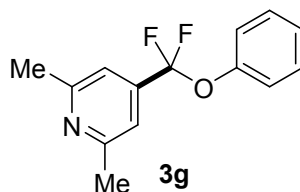



The product mixture was purified by silica gel column chromatography (hexane/EtOAc = 10:1) to afford **3g** (76.2 mg, 51%) as a yellowish liquid. **<sup>1</sup>H NMR** (400 MHz, CDCl<sub>3</sub>) δ ppm 7.30-7.26 (m, 2H), 7.21 (s, 2H), 7.18-7.13 (m, 3H), 2.51 (s, 6H); **<sup>19</sup>F NMR** (377 MHz, CDCl<sub>3</sub>) δ ppm -67.32 (s, 2F); **<sup>13</sup>C NMR** (101 MHz, CDCl<sub>3</sub>) δ ppm 157.8, 149.0, 141.3 (t, *J* = 32.9 Hz), 128.5, 124.9, 120.9, 120.0 (t, *J* = 263.6 Hz), 118.6, 115.5 (t, *J* = 3.5 Hz), 114.6, 23.4; **IR** (thin film) ν 1588, 1491, 1387, 1346, 1234, 1142, 1049, 865, 728, 689 cm<sup>-1</sup>; **MS** (ESI): *m/z* 250 [M+H]<sup>+</sup>; **HRMS** (ESI) *m/z*: [M+H]<sup>+</sup> Calcd. for C<sub>14</sub>H<sub>14</sub>F<sub>2</sub>NO 250.1038; Found 250.1036.

### 2-(Difluoro(phenoxy)methyl)pyrazine (3h)

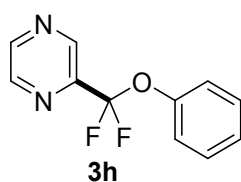

The product mixture was purified by silica gel column chromatography (hexane/EtOAc = 10:1) to afford **3h** (60.0 mg, 45%) as a yellowish liquid. **<sup>1</sup>H NMR** (400 MHz, CDCl<sub>3</sub>) δ ppm 9.02 (s, 1H), 8.71 (s, 1H), 8.66 (s, 1H), 7.34-7.31 (m, 2H), 7.26-7.18 (m, 3H); **<sup>19</sup>F NMR** (377 MHz, CDCl<sub>3</sub>) δ ppm -69.91 (s, 2F); **<sup>13</sup>C NMR** (101 MHz, CDCl<sub>3</sub>) δ ppm 148.8, 145.8, 145.8 (t, *J* = 34.2 Hz), 143.1, 141.4 (t, *J* = 3.2 Hz), 128.5, 125.2, 121.0, 118.3 (t, *J* = 264.6 Hz); **IR** (thin film) ν 1591, 1491, 1326, 1190, 1058, 1017, 859, 754, 723, 689 cm<sup>-1</sup>; **MS** (ESI): *m/z* 223 [M+H]<sup>+</sup>; **HRMS** (ESI) *m/z*: [M+H]<sup>+</sup> Calcd. for C<sub>11</sub>H<sub>9</sub>F<sub>2</sub>N<sub>2</sub>O 223.0677; Found 223.0676.

### 3-(Difluoro(phenoxy)methyl)pyridazine (3i)

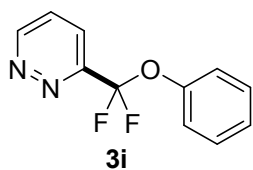

The product mixture was purified by silica gel column chromatography (hexane/EtOAc = 5:1) to afford **3i** (53.3 mg, 40%) as a yellowish liquid. **<sup>1</sup>H NMR** (400 MHz, CDCl<sub>3</sub>) δ ppm 9.46 (s, 1H), 9.33 (d, *J* = 5.2 Hz, 1H), 7.70 (d, *J* = 3.9 Hz, 1H), 7.33-7.29 (m, 2H), 7.21-7.17 (m, 3H); **<sup>19</sup>F NMR** (377 MHz, CDCl<sub>3</sub>) δ ppm -66.98 (s, 2F); **<sup>13</sup>C NMR** (101 MHz, CDCl<sub>3</sub>) δ ppm 150.6, 148.4, 146.6 (t, *J* = 2.9 Hz), 131.3 (t, *J* = 35.1 Hz), 128.7, 125.5, 121.5 (t, *J* = 3.5 Hz), 120.8, 119.0 (t, *J* = 263.8 Hz); **IR** (thin film) ν 1592, 1491, 1363, 1322, 1152, 1046, 865, 748, 706, 688 cm<sup>-1</sup>;

**MS** (ESI):  $m/z$  223  $[M+H]^+$ ; **HRMS** (ESI)  $m/z$ :  $[M+H]^+$  Calcd. for  $C_{11}H_9F_2N_2O$  223.0677; Found 223.0676.

### 2-(Difluoro(phenoxy)methyl)-1,5-naphthyridine (3j)

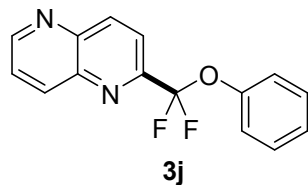

The product mixture was purified by silica gel column chromatography (hexane/EtOAc = 5:1) to afford **3j** (106.1 mg, 65%) as a yellowish liquid. **<sup>1</sup>H NMR** (400 MHz,  $CDCl_3$ )  $\delta$  ppm 9.15 (dd,  $J$  = 4.0, 1.3 Hz, 1H), 9.06 (d,  $J$  = 4.3 Hz, 1H), 8.45 (dd,  $J$  = 8.5, 1.3 Hz, 1H), 8.01 (d,  $J$  = 4.4 Hz, 1H), 7.68 (dd,  $J$  = 8.5, 4.1 Hz, 1H), 7.39-7.32 (m, 4H), 7.21-7.18 (m, 1H); **<sup>19</sup>F NMR** (377 MHz,  $CDCl_3$ )  $\delta$  ppm -64.46 (s, 2F); **<sup>13</sup>C NMR** (101 MHz,  $CDCl_3$ )  $\delta$  ppm 151.7, 150.7, 150.4, 144.6, 139.9, 138.4 (t,  $J$  = 31.5 Hz), 137.6, 129.5, 125.9, 124.8, 122.1, 121.7 (t,  $J$  = 5.1 Hz), 121.0 (t,  $J$  = 265.0 Hz); **IR** (thin film)  $\nu$  1593, 1492, 1319, 1270, 1200, 1135, 974, 869, 736, 648  $cm^{-1}$ ; **MS** (ESI):  $m/z$  273  $[M+H]^+$ ; **HRMS** (ESI)  $m/z$ :  $[M+H]^+$  Calcd. for  $C_{15}H_{11}F_2N_2O$  273.0834; Found 273.0832.

### 6-(Difluoro(phenoxy)methyl)phenanthridine (3k)

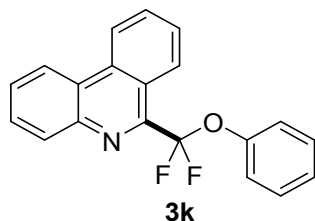

The product mixture was purified by silica gel column chromatography (hexane/EtOAc = 15:1) to afford **3k** (61.8 mg, 32%) as a white solid. m.p. 78-80 °C; **<sup>1</sup>H NMR** (400 MHz,  $CDCl_3$ )  $\delta$  ppm 8.55 (d,  $J$  = 8.3 Hz, 1H), 8.50 (d,  $J$  = 8.3 Hz, 1H), 8.42 (d,  $J$  = 8.0 Hz, 1H), 8.20 (d,  $J$  = 8.1 Hz, 1H), 7.73-7.71 (m, 1H), 7.67-7.58 (m, 3H), 7.33-7.24 (m, 4H), 7.13-7.09 (m, 1H); **<sup>19</sup>F NMR** (377 MHz,  $CDCl_3$ )  $\delta$  ppm -67.21 (s, 2F); **<sup>13</sup>C NMR** (101 MHz,  $CDCl_3$ )  $\delta$  ppm 149.4, 148.2 (t,  $J$  = 31.5 Hz), 140.8, 132.9, 129.9, 128.5, 128.0, 127.6, 126.6, 125.8 (t,  $J$  = 2.9 Hz), 124.7, 123.9, 121.3, 121.2, 120.9, 120.6, 119.3 (t,  $J$  = 265.1 Hz); **IR** (thin film)  $\nu$  1589, 1490, 1374, 1255, 1063, 865, 789, 724, 687  $cm^{-1}$ ; **MS** (ESI):  $m/z$  322  $[M+H]^+$ ; **HRMS** (ESI)  $m/z$ :  $[M+H]^+$  Calcd. for  $C_{20}H_{14}F_2NO$  322.1038; Found 322.1034. These assignments

matched with those previously reported (Xiao, P.; Ni, C.; Miao, W.; Zhou, M.; Hu, J.; Chen, D.; Hu, J. *J. Org. Chem.* **2019**, *84*, 8345).

### 3-(Difluoro(phenoxy)methyl)-2H-chromen-2-one (3l)

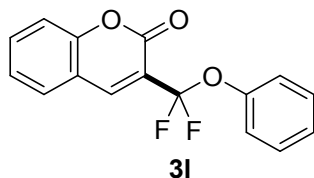

The product mixture was purified by silica gel column chromatography (hexane/EtOAc = 8:1) to afford **3l** (60.5 mg, 35%) as a white solid. m.p. 100-102 °C;  $^1\text{H}$  NMR (600 MHz,  $\text{CDCl}_3$ )  $\delta$  ppm 8.25 (s, 1H), 7.67-7.62 (m, 2H), 7.41-7.34 (m, 6H), 7.28-7.26 (m, 1H);  $^{19}\text{F}$  NMR (565 MHz,  $\text{CDCl}_3$ )  $\delta$  ppm -69.13 (s, 2F);  $^{13}\text{C}$  NMR (101 MHz,  $\text{CDCl}_3$ )  $\delta$  ppm 156.5, 154.6, 150.0, 142.7 (t,  $J = 5.0$  Hz), 133.7, 129.5, 129.3, 126.1, 125.0, 122.2, 120.5 (t,  $J = 33.2$  Hz), 119.5 (t,  $J = 264.6$  Hz), 117.3, 116.9; IR (thin film)  $\nu$  1728, 1636, 1568, 1489, 1249, 1042, 962, 745, 689  $\text{cm}^{-1}$ ; MS (ESI):  $m/z$  289  $[\text{M}+\text{H}]^+$ ; HRMS (ESI)  $m/z$ :  $[\text{M}+\text{H}]^+$  Calcd. for  $\text{C}_{16}\text{H}_{11}\text{F}_2\text{O}_3$  289.0671; Found 289.0669.

### 2-(Difluoro(phenoxy)methyl)naphthalene-1,4-dione (3m)

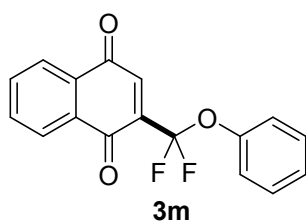

The product mixture was purified by silica gel column chromatography (hexane/EtOAc = 10:1) to afford **3m** (135 mg, 75%) as a bright yellow solid. m.p. 88-90 °C;  $^1\text{H}$  NMR (400 MHz,  $\text{DMSO}-d_6$ )  $\delta$  ppm 8.09 (d,  $J = 6.5$  Hz, 1H), 8.04 (d,  $J = 8.2$  Hz, 1H), 7.99-7.89 (m, 2H), 7.50-7.46 (m, 3H), 7.35-7.32 (m, 3H);  $^{19}\text{F}$  NMR (377 MHz,  $\text{CDCl}_3$ )  $\delta$  ppm -68.47 (s, 2F);  $^{13}\text{C}$  NMR (101 MHz,  $\text{CDCl}_3$ )  $\delta$  ppm 184.3, 180.3, 149.7, 139.2 (t,  $J = 30.3$  Hz), 136.5 (t,  $J = 4.9$  Hz), 134.7, 134.3, 132.1, 131.6, 129.6, 127.0, 126.4, 126.2, 122.2, 119.0 (t,  $J = 265.9$  Hz); IR (thin film)  $\nu$  1664, 1590, 1366, 1149, 1062, 929, 781, 683  $\text{cm}^{-1}$ ; MS (ESI):  $m/z$  323  $[\text{M}+\text{Na}]^+$ ; HRMS (ESI)  $m/z$ :  $[\text{M}+\text{Na}]^+$  Calcd. for  $\text{C}_{17}\text{H}_{10}\text{F}_2\text{NaO}_3$  323.0490; Found 323.0483.

### 2-((4-(*Tert*-butyl)phenoxy)difluoromethyl)naphthalene-1,4-dione (3ma)

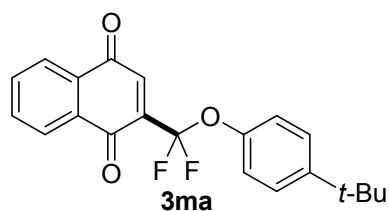

The product mixture was purified by silica gel column chromatography (hexane/EtOAc = 10:1) to afford **3ma** (119.6 mg, 56%) as a yellow solid. m.p. 84-86 °C; **<sup>1</sup>H NMR** (400 MHz, CDCl<sub>3</sub>) δ ppm 8.18 (d, *J* = 6.9 Hz, 1H), 8.10 (d, *J* = 6.8 Hz, 1H), 7.83-7.80 (m, 2H), 7.40-7.38 (m, 3H), 7.22 (d, *J* = 8.5 Hz, 2H), 1.32 (s, 9H); **<sup>19</sup>F NMR** (377 MHz, CDCl<sub>3</sub>) δ ppm -68.47 (s, 2F); **<sup>13</sup>C NMR** (101 MHz, CDCl<sub>3</sub>) δ ppm 184.4, 180.3, 149.1, 147.3, 139.4 (t, *J* = 30.9 Hz), 136.5 (t, *J* = 4.9 Hz), 134.6, 134.2, 132.1, 131.6, 127.0, 126.4, 126.3, 121.6, 119.0 (t, *J* = 265.7 Hz), 34.5, 31.4; **IR** (thin film) ν 1671, 1594, 1508, 1364, 1245, 1152, 1065, 923, 779, 717 cm<sup>-1</sup>; **MS** (ESI): *m/z* 379 [M+Na]<sup>+</sup>; **HRMS** (ESI) *m/z*: [M+Na]<sup>+</sup> Calcd. for C<sub>21</sub>H<sub>18</sub>F<sub>2</sub>NaO<sub>3</sub> 379.1116; Found 379.1109.

### 2-(Difluoro(4-fluorophenoxy)methyl)naphthalene-1,4-dione (**3mb**)

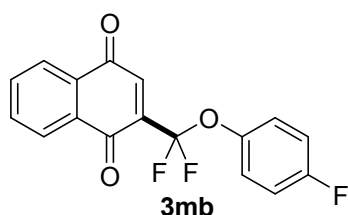

The product mixture was purified by silica gel column chromatography (hexane/EtOAc = 10:1) to afford **3mb** (152.6 mg, 80%) as a bright yellow solid. m.p. 109-111 °C; **<sup>1</sup>H NMR** (400 MHz, CD<sub>3</sub>CN) δ ppm 8.15 (d, *J* = 6.9 Hz, 1H), 8.08 (d, *J* = 7.8 Hz, 1H), 7.95-7.85 (m, 2H), 7.43 (s, 1H), 7.36 (dd, *J* = 8.6, 4.5 Hz, 2H), 7.22-7.18 (m, 2H); **<sup>19</sup>F NMR** (377 MHz, CD<sub>3</sub>CN) δ ppm -69.10 (s, 2F), -117.54--117.75 (m, 1F); **<sup>13</sup>C NMR** (101 MHz, CDCl<sub>3</sub>) δ ppm 184.2, 180.2, 160.6 (d, *J* = 246.4 Hz), 145.4, 139.1 (t, *J* = 31.3 Hz), 136.6 (t, *J* = 5.0 Hz), 134.6, 134.3, 132.1, 131.6, 127.0, 126.4, 123.9 (d, *J* = 8.0 Hz), 118.9 (t, *J* = 266.7 Hz), 116.2 (d, *J* = 23.5 Hz); **IR** (thin film) ν 1666, 1591, 1501, 1369, 1142, 1048, 922, 777, 716 cm<sup>-1</sup>; **MS** (ESI): *m/z* 341 [M+Na]<sup>+</sup>; **HRMS** (ESI) *m/z*: [M+Na]<sup>+</sup> Calcd. for C<sub>17</sub>H<sub>9</sub>F<sub>3</sub>NaO<sub>3</sub> 341.0396; Found 341.0391.

### 2-((4-Chlorophenoxy)difluoromethyl)naphthalene-1,4-dione (**3mc**)

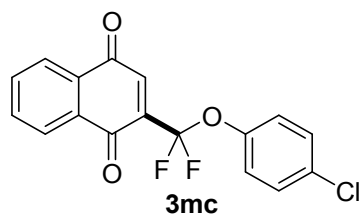

The product mixture was purified by silica gel column chromatography (hexane/EtOAc = 10:1) to afford **3mc** (156.3 mg, 78%) as a bright yellow solid. m.p. 98-100 °C; **<sup>1</sup>H NMR** (400 MHz, CD<sub>3</sub>CN) δ ppm 8.14 (d, *J* = 6.6 Hz, 1H), 8.08 (d, *J* = 6.8 Hz, 1H), 7.93-7.87 (m, 2H), 7.3-7.40 (m, 3H), 7.33 (d, *J* = 8.4 Hz, 2H); **<sup>19</sup>F NMR** (377 MHz, CD<sub>3</sub>CN) δ ppm -68.95 (s, 2F); **<sup>13</sup>C NMR** (101 MHz, CDCl<sub>3</sub>) δ ppm 184.2, 180.2, 148.1, 139.0 (t, *J* = 30.3 Hz), 136.6 (t, *J* = 5.1 Hz), 134.7, 134.3, 132.0, 131.8, 131.6, 129.6, 127.0, 126.4, 123.6, 119.0 (t, *J* = 266.6 Hz); **IR** (thin film) ν 1670, 1597, 1489, 1370, 1248, 1072, 918, 778, 714 cm<sup>-1</sup>; **MS** (EI): *m/z* 334 M<sup>+</sup>; **HRMS** (EI) *m/z*: M<sup>+</sup> Calcd. for C<sub>17</sub>H<sub>9</sub>ClF<sub>2</sub>O<sub>3</sub> 334.0203; Found 334.0204.

#### 2-((4-Bromophenoxy)difluoromethyl)naphthalene-1,4-dione (**3md**)

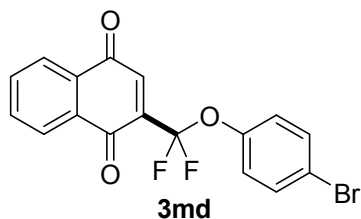

The product mixture was purified by silica gel column chromatography (hexane/EtOAc = 10:1) to afford **3md** (161 mg, 71%) as a yellow solid. m.p. 102-104 °C; **<sup>1</sup>H NMR** (400 MHz, CDCl<sub>3</sub>) δ ppm 8.18 (d, *J* = 7.0 Hz, 1H), 8.11 (d, *J* = 7.1 Hz, 1H), 7.85-7.81 (m, 2H), 7.50 (d, *J* = 8.5 Hz, 2H), 7.37 (s, 1H), 7.20 (d, *J* = 8.4 Hz, 2H); **<sup>19</sup>F NMR** (377 MHz, CDCl<sub>3</sub>) δ ppm -68.92 (s, 2F); **<sup>13</sup>C NMR** (101 MHz, CDCl<sub>3</sub>) δ ppm 184.2, 180.2, 148.7, 138.9 (t, *J* = 30.3 Hz), 136.6 (t, *J* = 5.0 Hz), 134.7, 134.4, 132.7, 132.0, 131.5, 127.0, 126.4, 124.0, 119.5, 118.9 (t, *J* = 266.8 Hz); **IR** (thin film) ν 1671, 1587, 1488, 1371, 1143, 1050, 919, 775, 669 cm<sup>-1</sup>; **MS** (EI): *m/z* 378 M<sup>+</sup>; **HRMS** (EI) *m/z*: M<sup>+</sup> Calcd. for C<sub>17</sub>H<sub>9</sub>BrF<sub>2</sub>O<sub>3</sub> 377.9698; Found 377.9694.

#### 2-(Difluoro(*m*-tolylloxy)methyl)naphthalene-1,4-dione (**3me**)

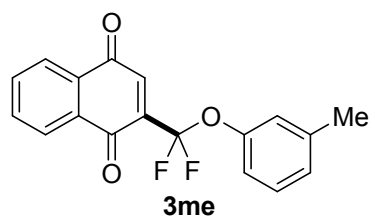

The product mixture was purified by silica gel column chromatography (hexane/EtOAc = 10:1) to afford **3me** (135.6 mg, 72%) as a yellow solid. m.p. 87-89 °C; **<sup>1</sup>H NMR** (600 MHz, CDCl<sub>3</sub>) δ ppm 8.15 (d, *J* = 6.1 Hz, 1H), 8.07 (d, *J* = 6.0 Hz, 1H), 7.81-7.76 (m, 2H), 7.36 (s, 1H), 7.27-7.24 (m, 1H), 7.13-7.11 (m, 1H), 7.06 (d, *J* = 7.6 Hz, 2H), 2.37 (s, 3H); **<sup>19</sup>F NMR** (565 MHz, CDCl<sub>3</sub>) δ ppm -68.36 (s, 2F); **<sup>13</sup>C NMR** (101 MHz, CDCl<sub>3</sub>) δ ppm 184.1, 180.2, 149.6, 139.8, 139.2 (t, *J* = 30.8 Hz), 136.5 (t, *J* = 4.9 Hz), 134.6, 134.3, 132.0, 131.5, 129.3, 127.0, 126.9, 126.3, 122.8, 119.1, 118.9 (t, *J* = 265.6 Hz), 21.3; **IR** (thin film) ν 1671, 1593, 1488, 1364, 1246, 1146, 1055, 919, 779, 686 cm<sup>-1</sup>; **MS** (ESI): *m/z* 337 [M+Na]<sup>+</sup>; **HRMS** (ESI) *m/z*: [M+Na]<sup>+</sup> Calcd. for C<sub>18</sub>H<sub>12</sub>F<sub>2</sub>NaO<sub>3</sub> 337.0647; Found 337.0641.

## 5. General Procedures for Arylthiodifluoromethylation of Heteroarenes

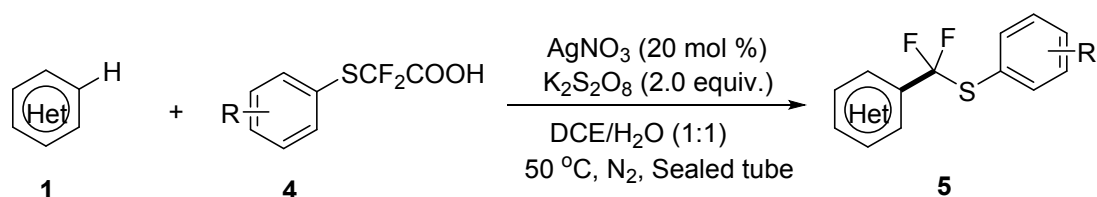

To a sealed tube equipped with a stir bar were added **1** (0.6 mmol, 1.0 equiv), AgNO<sub>3</sub> (20.4 mg, 0.12 mmol, 20 mol %), and K<sub>2</sub>S<sub>2</sub>O<sub>8</sub> (324.4 mg, 1.2 mmol, 2.0 equiv). The tube was evacuated and backfilled with pure N<sub>2</sub> for three times. Then arylthiodifluoroacetic acid **4** (1.8 mmol, 3.0 equiv) in DCE/H<sub>2</sub>O (3.0/3.0 mL) were added. The tube was sealed and the mixture was heated at 50 °C in an oil bath for 20 h. After the reaction was complete, saturated NaHCO<sub>3</sub> solution was added. The resulting mixture was extracted with ethyl acetate for three times. The combined organic layer was washed with brine, dried over anhydrous Na<sub>2</sub>SO<sub>4</sub>, and concentrated under reduced pressure. The resulting residue was purified by silica gel flash column chromatography to give the product **5**.

### Ethyl 2-(difluoro(phenylthio)methyl)isonicotinate (**5a**)

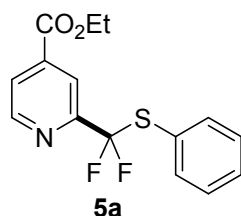

The product mixture was purified by silica gel column chromatography (hexane/EtOAc = 10:1) to afford **5a** (142.8 mg, 77%) as a yellowish liquid. <sup>1</sup>H NMR (400 MHz, CDCl<sub>3</sub>) δ ppm 8.85 (d, *J* = 4.9 Hz, 1H), 8.13 (s, 1H), 7.96 (dd, *J* = 4.9, 1.0 Hz, 1H), 7.68-7.65 (m, 2H), 7.46-7.42 (m, 1H), 7.40-7.36 (m, 2H), 4.43 (q, *J* = 7.1 Hz, 2H), 1.42 (t, *J* = 7.1 Hz, 3H); <sup>19</sup>F NMR (377 MHz, CDCl<sub>3</sub>) δ ppm -74.79 (s, 2F); <sup>13</sup>C NMR (151 MHz, CDCl<sub>3</sub>) δ ppm 164.1, 154.4 (t, *J* = 28.2 Hz), 150.3, 139.1, 136.8, 130.2, 129.1, 126.3, 126.2 (t, *J* = 278.8 Hz), 124.7, 119.6 (t, *J* = 3.2 Hz), 62.2, 14.2; IR (thin film) ν 1727, 1566, 1368, 1307, 1224, 1016, 961, 867, 749 cm<sup>-1</sup>; MS (ESI): *m/z* 310 [M+H]<sup>+</sup>; HRMS (ESI) *m/z*: [M+H]<sup>+</sup> Calcd. for C<sub>15</sub>H<sub>14</sub>F<sub>2</sub>NO<sub>2</sub>S 310.0708; Found 310.0706.

### 2-(Difluoro(phenylthio)methyl)isonicotinonitrile (**5b**)

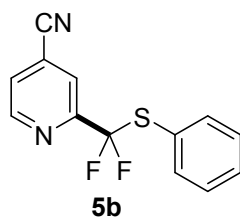

The product mixture was purified by silica gel column chromatography (hexane/EtOAc = 8:1) to afford **5b** (102.2 mg, 65%) as a white solid. m.p. 80-82 °C; **<sup>1</sup>H NMR** (400 MHz, CDCl<sub>3</sub>) δ ppm 8.89 (d, *J* = 4.9 Hz, 1H), 7.75 (s, 1H), 7.64-7.61 (m, 3H), 7.49-7.45 (m, 1H), 7.41-7.37 (m, 2H); **<sup>19</sup>F NMR** (377 MHz, CDCl<sub>3</sub>) δ ppm -75.64 (s); **<sup>13</sup>C NMR** (151 MHz, CDCl<sub>3</sub>) δ ppm 154.9 (t, *J* = 28.9 Hz), 150.6, 136.8, 130.5, 129.3, 127.0, 125.7, 125.6 (t, *J* = 279.3 Hz), 122.0, 121.7, 115.6; **IR** (thin film) ν 1599, 1473, 1289, 1048, 969, 860, 804, 710, 640 cm<sup>-1</sup>; **MS** (ESI): *m/z* 263 [M+H]<sup>+</sup>; **HRMS** (ESI) *m/z*: [M+H]<sup>+</sup> Calcd. for C<sub>13</sub>H<sub>9</sub>F<sub>2</sub>N<sub>2</sub>S 263.0449; Found 263.0448.

### 1-(2-(Difluoro(phenylthio)methyl)pyridin-4-yl)ethan-1-one (**5c**)

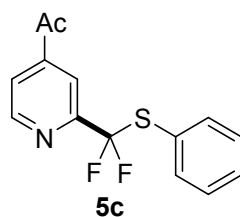

The product mixture was purified by silica gel column chromatography (hexane/EtOAc = 5:1) to afford **5c** (95.4 mg, 57%) as a yellow liquid. **<sup>1</sup>H NMR** (400 MHz, CDCl<sub>3</sub>) δ ppm 8.89 (d, *J* = 5.0 Hz, 1H), 7.97 (s, 1H), 7.83 (d, *J* = 4.9 Hz, 1H), 7.65 (d, *J* = 7.2 Hz, 2H), 7.47-7.43 (m, 1H), 7.40-7.37 (m, 2H), 2.62 (s, 3H); **<sup>19</sup>F NMR** (377 MHz, CDCl<sub>3</sub>) δ ppm -74.95 (s, 2F); **<sup>13</sup>C NMR** (151 MHz, CDCl<sub>3</sub>) δ ppm 196.1, 154.8 (t, *J* = 28.2 Hz), 150.8, 144.0, 136.8, 130.2, 129.1, 126.3, 126.2 (t, *J* = 278.8 Hz), 122.9, 118.0 (t, *J* = 3.2 Hz), 26.7; **IR** (thin film) ν 1698, 1560, 1360, 1295, 1213, 1054, 947, 847, 690 cm<sup>-1</sup>; **MS** (ESI): *m/z* 280 [M+H]<sup>+</sup>; **HRMS** (ESI) *m/z*: [M+H]<sup>+</sup> Calcd. for C<sub>14</sub>H<sub>12</sub>F<sub>2</sub>NOS 280.0602; Found 280.0600.

### 1-(6-(Difluoro(phenylthio)methyl)pyridin-2-yl)ethan-1-one (**5n**)

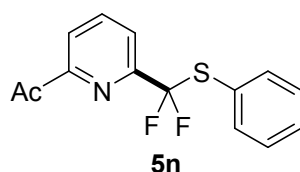



The product mixture was purified by silica gel column chromatography (hexane/EtOAc = 5:1) to afford **5n** (100.4 mg, 60%) as a yellow liquid. **<sup>1</sup>H NMR** (400 MHz, CDCl<sub>3</sub>) δ ppm 8.63 (d, *J* = 5.0 Hz, 1H), 8.05 (s, 1H), 7.47-7.43 (m, 3H), 7.36-7.32 (m, 1H), 7.28-7.24 (m, 2H), 2.63 (s, 3H); **<sup>19</sup>F NMR** (377 MHz, CDCl<sub>3</sub>) δ ppm -75.05 (s, 2F); **<sup>13</sup>C NMR** (101 MHz, CDCl<sub>3</sub>) δ ppm 198.9, 154.1, 149.5, 145.1 (t, *J* = 27.2 Hz), 136.6, 130.5, 129.3, 126.1 (t, *J* = 280.1 Hz), 126.0, 122.7 (t, *J* = 4.2 Hz), 117.8 (t, *J* = 4.4 Hz), 25.8; **IR** (thin film) ν 1700, 1353, 1213, 1052, 906, 845, 749, 659, 589 cm<sup>-1</sup>; **MS** (ESI): *m/z* 280 [M+H]<sup>+</sup>; **HRMS** (ESI) *m/z*: [M+H]<sup>+</sup> Calcd. for C<sub>14</sub>H<sub>12</sub>F<sub>2</sub>NOS 280.0602; Found 280.0600.

### 2-(Difluoro(phenylthio)methyl)-4-methylquinoline (**5o**)

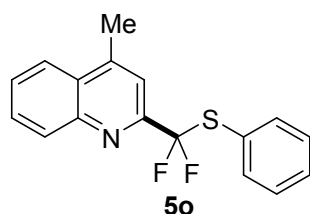

The product mixture was purified by silica gel column chromatography (hexane/EtOAc = 10:1) to afford **5o** (81.3 mg, 45%) as a white solid. m.p. 79-81 °C; **<sup>1</sup>H NMR** (400 MHz, CDCl<sub>3</sub>) δ ppm 8.37 (d, *J* = 8.3 Hz, 1H), 7.99 (d, *J* = 8.4 Hz, 1H), 7.66-7.62 (m, 1H), 7.52-7.47 (m, 3H), 7.34-7.23 (m, 4H), 2.60 (s, 3H); **<sup>19</sup>F NMR** (377 MHz, CDCl<sub>3</sub>) δ ppm -71.27 (s, 2F); **<sup>13</sup>C NMR** (101 MHz, CDCl<sub>3</sub>) δ ppm 157.1, 147.7, 138.4 (t, *J* = 24.1 Hz), 135.5, 129.3, 128.7, 128.4, 128.1, 128.0, 125.5 (t, *J* = 280.1 Hz), 125.4, 124.1 (t, *J* = 3.0 Hz), 120.7, 117.8 (t, *J* = 6.7 Hz) 24.3; **IR** (thin film) ν 1603, 1510, 1440, 1329, 1236, 1134, 1024, 964, 750, 642 cm<sup>-1</sup>; **MS** (ESI): *m/z* 302 [M+H]<sup>+</sup>; **HRMS** (ESI) *m/z*: [M+H]<sup>+</sup> Calcd. for C<sub>17</sub>H<sub>14</sub>F<sub>2</sub>NS 302.0810; Found 302.0807.

### 2-(Difluoro(phenylthio)methyl)pyrazine (**5h**)

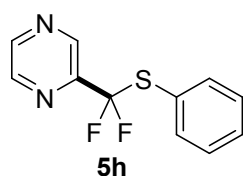

The product mixture was purified by silica gel column chromatography (hexane/EtOAc = 8:1) to afford **5h** (42.8 mg, 30%) as a yellow solid. m.p. 62-64 °C; **<sup>1</sup>H NMR** (400 MHz, CDCl<sub>3</sub>) δ ppm 8.74 (s, 1H), 8.62-8.59 (m, 2H), 7.55 (d, *J* = 7.3 Hz, 2H), 7.39-7.36 (m, 1H), 7.32-7.29 (m, 2H); **<sup>19</sup>F NMR** (377 MHz, CDCl<sub>3</sub>) δ ppm

-75.90 (s, 2F);  $^{13}\text{C}$  NMR (101 MHz,  $\text{CDCl}_3$ )  $\delta$  ppm 147.9 (t,  $J = 28.5$  Hz), 145.4, 142.8, 140.8 (t,  $J = 3.8$  Hz), 135.8, 129.4, 128.2, 124.8 (t,  $J = 279.5$  Hz), 124.7; IR (thin film)  $\nu$  1475, 1407, 1283, 1078, 1018, 927, 849, 747, 688  $\text{cm}^{-1}$ ; MS (ESI):  $m/z$  239  $[\text{M}+\text{H}]^+$ ; HRMS (ESI)  $m/z$ :  $[\text{M}+\text{H}]^+$  Calcd. for  $\text{C}_{11}\text{H}_9\text{F}_2\text{N}_2\text{S}$  239.0449; Found 239.0447.

### 3-(((4-Chlorophenyl)thio)difluoromethyl)pyridazine (5ic)

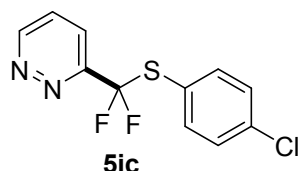

The product mixture was purified by silica gel column chromatography (hexane/EtOAc = 4:1) to afford **5ic** (138.7 mg, 85%) as a white solid. m.p. 102-104  $^{\circ}\text{C}$ ;  $^1\text{H}$  NMR (400 MHz,  $\text{CDCl}_3$ )  $\delta$  ppm 9.33 (d,  $J = 5.4$  Hz, 2H), 7.52-7.48 (m, 3H), 7.39-7.36 (m, 2H);  $^{19}\text{F}$  NMR (377 MHz,  $\text{CDCl}_3$ )  $\delta$  ppm -76.25 (s, 2F);  $^{13}\text{C}$  NMR (101 MHz,  $\text{CDCl}_3$ )  $\delta$  ppm 151.2, 147.1 (t,  $J = 3.8$  Hz), 137.9, 137.7, 134.4 (t,  $J = 27.9$  Hz), 129.8, 125.0 (t,  $J = 280.6$  Hz), 123.6, 121.9 (t,  $J = 4.4$  Hz); IR (thin film)  $\nu$  1568, 1472, 1386, 1265, 1046, 926, 824, 718  $\text{cm}^{-1}$ ; MS (ESI):  $m/z$  273  $[\text{M}+\text{H}]^+$ ; HRMS (ESI)  $m/z$ :  $[\text{M}+\text{H}]^+$  Calcd. for  $\text{C}_{11}\text{H}_8\text{ClF}_2\text{N}_2\text{S}$  273.0059; Found 273.0057.

### 6-(((4-Chlorophenyl)thio)difluoromethyl)phenanthridine (5kc)

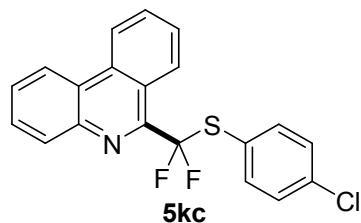

The product mixture was purified by silica gel column chromatography (hexane/EtOAc = 15:1) to afford **5kc** (140.2 mg, 63%) as a white solid. m.p. 124-126  $^{\circ}\text{C}$ ;  $^1\text{H}$  NMR (400 MHz,  $\text{CDCl}_3$ )  $\delta$  ppm 8.61 (d,  $J = 8.3$  Hz, 1H), 8.53-8.50 (m, 2H), 8.25 (d,  $J = 7.5$  Hz, 1H), 7.85-7.81 (m, 1H), 7.77-7.65 (m, 5H), 7.40 (d,  $J = 8.3$  Hz, 2H);  $^{19}\text{F}$  NMR (377 MHz,  $\text{CDCl}_3$ )  $\delta$  ppm -65.59 (s, 2F);  $^{13}\text{C}$  NMR (101 MHz,  $\text{CDCl}_3$ )  $\delta$  ppm 150.8 (t,  $J = 28.3$  Hz), 141.6, 138.4, 136.6, 134.0, 131.2, 130.8, 129.7 (t,  $J = 280.1$  Hz), 129.3, 129.2, 128.9, 127.7, 126.8 (t,  $J = 5.4$  Hz), 126.0, 125.0, 122.5, 122.1, 121.8; IR (thin film)  $\nu$  1571, 1474, 1363, 1133, 1048, 874, 824, 778, 724  $\text{cm}^{-1}$ ; MS (ESI):  $m/z$  372  $[\text{M}+\text{H}]^+$ ; HRMS (ESI)  $m/z$ :  $[\text{M}+\text{H}]^+$  Calcd. for  $\text{C}_{20}\text{H}_{13}\text{ClF}_2\text{NS}$  372.0420; Found 372.0416.

### 9-(Difluoro(phenylthio)methyl)acridine (**5p**)

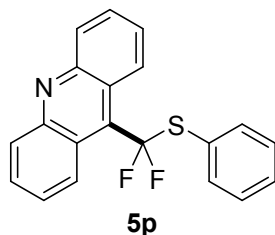

The product mixture was purified by silica gel column chromatography (hexane/EtOAc = 6:1) to afford **5p** (117.3 mg, 58%) as a yellow solid. m.p. 169-171 °C; **<sup>1</sup>H NMR** (400 MHz, CDCl<sub>3</sub>) δ ppm 8.53 (d, *J* = 8.2 Hz, 2H), 8.16 (d, *J* = 8.3 Hz, 2H), 7.70-7.64 (m, 4H), 7.51-7.48 (m, 2H), 7.37-7.31 (m, 3H); **<sup>19</sup>F NMR** (377 MHz, CDCl<sub>3</sub>) δ ppm -59.30 (s, 2F); **<sup>13</sup>C NMR** (101 MHz, CDCl<sub>3</sub>) δ ppm 149.0, 136.8, 135.7 (t, *J* = 23.4 Hz), 130.5, 130.4, 129.7, 129.3, 129.1 (t, *J* = 283.2 Hz), 127.0, 126.4, 125.6 (t, *J* = 8.4 Hz), 122.8; **IR** (thin film) ν 1521, 1439, 1344, 1128, 1037, 981, 864, 749, 687 cm<sup>-1</sup>; **MS** (ESI): *m/z* 338 [M+H]<sup>+</sup>; **HRMS** (ESI) *m/z*: [M+H]<sup>+</sup> Calcd. for C<sub>20</sub>H<sub>14</sub>F<sub>2</sub>NS 338.0810; Found 338.0808.

### Ethyl 2-(difluoro((4-fluorophenyl)thio)methyl)isonicotinate (**5ab**)

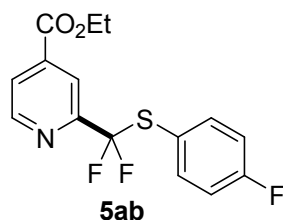

The product mixture was purified by silica gel column chromatography (hexane/EtOAc = 10:1) to afford **5ab** (153 mg, 78%) as a yellowish liquid. **<sup>1</sup>H NMR** (400 MHz, CDCl<sub>3</sub>) δ ppm 8.86 (d, *J* = 4.9 Hz, 1H), 8.13 (s, 1H), 7.98 (d, *J* = 4.9 Hz, 1H), 7.67-7.63 (m, 2H), 7.11-7.07 (m, 2H), 4.45 (q, *J* = 7.1 Hz, 2H), 1.43 (t, *J* = 7.1 Hz, 3H); **<sup>19</sup>F NMR** (377 MHz, CDCl<sub>3</sub>) δ ppm -75.06 (s, 2F), -109.92—110.00 (m, 1F); **<sup>13</sup>C NMR** (101 MHz, CDCl<sub>3</sub>) δ ppm 164.2 (d, *J* = 251.5 Hz), 164.1, 154.2 (t, *J* = 28.2 Hz), 150.4, 139.2, 139.0 (d, *J* = 8.8 Hz), 126.0 (t, *J* = 279.8 Hz), 124.8, 121.5, 119.6 (t, *J* = 3.3 Hz), 116.4 (d, *J* = 22.1 Hz), 62.3, 14.2; **IR** (thin film) ν 1727, 1589, 1490, 1307, 1223, 1060, 960, 833, 718 cm<sup>-1</sup>; **MS** (ESI): *m/z* 328 [M+H]<sup>+</sup>; **HRMS** (ESI) *m/z*: [M+H]<sup>+</sup> Calcd. for C<sub>15</sub>H<sub>13</sub>F<sub>3</sub>NO<sub>2</sub>S 328.0614; Found 328.0611.

### Ethyl 2-(((4-chlorophenyl)thio)difluoromethyl)isonicotinate (**5ac**)

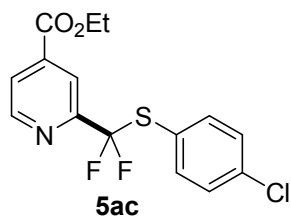

The product mixture was purified by silica gel column chromatography (hexane/EtOAc = 10:1) to afford **5ac** (154.4 mg, 75%) as a white solid. m.p. 44-46 °C; **<sup>1</sup>H NMR** (600 MHz, CDCl<sub>3</sub>) δ ppm 8.86 (d, *J* = 4.9 Hz, 1H), 8.14 (s, 1H), 7.98 (d, *J* = 4.9 Hz, 1H), 7.60 (d, *J* = 8.4 Hz, 2H), 7.37 (d, *J* = 8.4 Hz, 2H), 4.45 (q, *J* = 7.1 Hz, 2H), 1.43 (t, *J* = 7.1 Hz, 3H); **<sup>19</sup>F NMR** (377 MHz, CDCl<sub>3</sub>) δ ppm -74.48 (s, 2F); **<sup>13</sup>C NMR** (101 MHz, CDCl<sub>3</sub>) δ ppm 164.1, 154.1 (t, *J* = 28.1 Hz), 150.4, 139.2, 138.0, 136.9, 129.4, 126.0 (t, *J* = 280.1 Hz), 124.9, 124.8, 119.6 (t, *J* = 3.3 Hz), 62.3, 14.2; **IR** (thin film) ν 1724, 1567, 1477, 1368, 1302, 1225, 1093, 996, 824, 760 cm<sup>-1</sup>; **MS** (ESI): *m/z* 344 [M+H]<sup>+</sup>; **HRMS** (ESI) *m/z*: [M+H]<sup>+</sup> Calcd. for C<sub>15</sub>H<sub>13</sub>ClF<sub>2</sub>NO<sub>2</sub>S 344.0318; Found 324.0317.

#### Ethyl 2-(((4-bromophenyl)thio)difluoromethyl)isonicotinate (**5ad**)

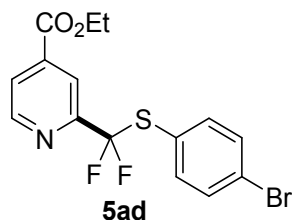

The product mixture was purified by silica gel column chromatography (hexane/EtOAc = 10:1) to afford **5ad** (150.9 mg, 65%) as a white solid. m.p. 58-60 °C; **<sup>1</sup>H NMR** (400 MHz, CDCl<sub>3</sub>) δ ppm 8.85 (d, *J* = 4.9 Hz, 1H), 8.14 (s, 1H), 7.98 (d, *J* = 4.9 Hz, 1H), 7.59-7.52 (m, 4H), 4.45 (q, *J* = 7.1 Hz, 2H), 1.43 (t, *J* = 7.1 Hz, 3H); **<sup>19</sup>F NMR** (377 MHz, CDCl<sub>3</sub>) δ ppm -74.37 (s, 2F); **<sup>13</sup>C NMR** (101 MHz, CDCl<sub>3</sub>) δ ppm 164.1, 154.1 (t, *J* = 28.0 Hz), 150.4, 139.3, 138.2, 132.4, 126.0 (t, *J* = 280.2 Hz), 125.4, 125.2, 124.9, 119.6 (t, *J* = 3.3 Hz), 62.3, 14.2; **IR** (thin film) ν 1724, 1561, 1474, 1369, 1303, 1262, 1065, 819, 760, 718 cm<sup>-1</sup>; **MS** (ESI): *m/z* 388 [M+H]<sup>+</sup>; **HRMS** (ESI) *m/z*: [M+H]<sup>+</sup> Calcd. for C<sub>15</sub>H<sub>13</sub>BrF<sub>2</sub>NO<sub>2</sub>S 387.9813; Found 387.9809.

#### Ethyl 2-(difluoro(*m*-tolylthio)methyl)isonicotinate (**5ae**)

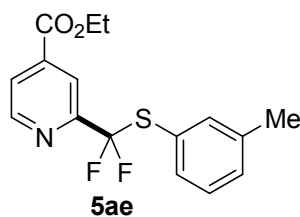

The product mixture was purified by silica gel column chromatography (hexane/EtOAc = 10:1) to afford **5ae** (139.5 mg, 72%) as a yellowish liquid. **<sup>1</sup>H NMR** (400 MHz, CDCl<sub>3</sub>) δ ppm 8.76 (d, *J* = 4.9 Hz, 1H), 8.04 (s, 1H), 7.87 (d, *J* = 4.9 Hz, 1H), 7.39-7.36 (m, 2H), 7.20-7.14 (m, 2H), 4.34 (q, *J* = 7.1 Hz, 2H), 2.27 (s, 3H), 1.32 (t, *J* = 7.1 Hz, 3H); **<sup>19</sup>F NMR** (377 MHz, CDCl<sub>3</sub>) δ ppm -74.87 (s, 2F); **<sup>13</sup>C NMR** (101 MHz, CDCl<sub>3</sub>) δ ppm 164.2, 154.5 (t, *J* = 28.2 Hz), 150.3, 139.1, 139.0, 137.3, 133.7, 131.0, 128.9, 126.2 (t, *J* = 279.7 Hz), 126.0, 124.6, 119.6 (t, *J* = 3.3 Hz), 62.2, 21.2, 14.2; **IR** (thin film) ν 1728, 1565, 1475, 1368, 1289, 1224, 1060, 960, 866, 762 cm<sup>-1</sup>; **MS** (ESI): *m/z* 324 [M+H]<sup>+</sup>; **HRMS** (ESI) *m/z*: [M+H]<sup>+</sup> Calcd. for C<sub>16</sub>H<sub>16</sub>F<sub>2</sub>NO<sub>2</sub>S 324.0864; Found 324.0863.

#### Ethyl 2-(((2-chlorophenyl)thio)difluoromethyl)isonicotinate (**5af**)

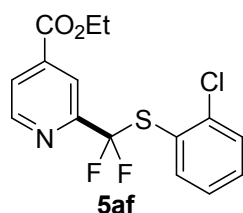

The product mixture was purified by silica gel column chromatography (hexane/EtOAc = 10:1) to afford **5af** (127.6 mg, 62%) as a yellow liquid. **<sup>1</sup>H NMR** (400 MHz, CDCl<sub>3</sub>) δ ppm 8.85 (d, *J* = 4.9 Hz, 1H), 8.15 (s, 1H), 7.98 (d, *J* = 4.9 Hz, 1H), 7.84 (dd, *J* = 7.7, 1.5 Hz, 1H), 7.49 (dd, *J* = 8.0, 1.4 Hz, 1H), 7.40-7.36 (m, 1H), 7.33-7.28 (m, 1H), 4.44 (q, *J* = 7.1 Hz, 2H), 1.42 (t, *J* = 7.1 Hz, 3H); **<sup>19</sup>F NMR** (377 MHz, CDCl<sub>3</sub>) δ ppm -74.14 (s, 2F); **<sup>13</sup>C NMR** (101 MHz, CDCl<sub>3</sub>) δ ppm 164.1, 154.1 (t, *J* = 27.9 Hz), 150.3, 140.2, 139.2, 139.1, 131.6, 130.3, 127.3, 126.2 (t, *J* = 281.4 Hz), 126.0, 124.8, 119.5 (t, *J* = 3.4 Hz), 62.3, 14.2; **IR** (thin film) ν 1727, 1565, 1452, 1289, 1224, 1063, 959, 815, 754 cm<sup>-1</sup>; **MS** (ESI): *m/z* 344 [M+H]<sup>+</sup>; **HRMS** (ESI) *m/z*: [M+H]<sup>+</sup> Calcd. for C<sub>15</sub>H<sub>13</sub>ClF<sub>2</sub>NO<sub>2</sub>S 344.0318; Found 344.0315.

## 6. Scale-up Experiments

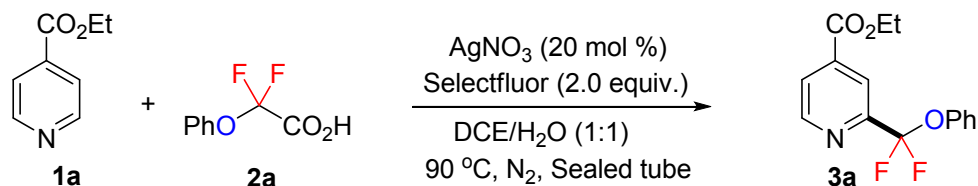

To a sealed tube equipped with a stir bar were added **1a** (181.2 mg, 1.2 mmol, 1.0 equiv),  $\text{AgNO}_3$  (40.8 mg, 0.24 mmol, 20 mol %), and selectfluor (850.2 mg, 2.4 mmol, 2.0 equiv). The tube was evacuated and backfilled with pure  $\text{N}_2$  for three times. Then phenoxydifluoroacetic acid **2a** (677.2 mg, 3.6 mmol, 3.0 equiv) in DCE/ $\text{H}_2\text{O}$  (6.0/6.0 mL) were added. The tube was sealed and the mixture was heated at  $90^\circ\text{C}$  in an oil bath for 20 h. After the reaction was complete, saturated  $\text{NaHCO}_3$  solution was added. The resulting mixture was extracted with ethyl acetate for three times. The combined organic layer was washed with brine, dried over anhydrous  $\text{Na}_2\text{SO}_4$ , and concentrated under reduced pressure. The resulting residue was purified by silica gel flash column chromatography (hexane/ $\text{EtOAc}$  = 10:1) to give **3a** (204.8 mg, 58%) as a yellowish liquid.

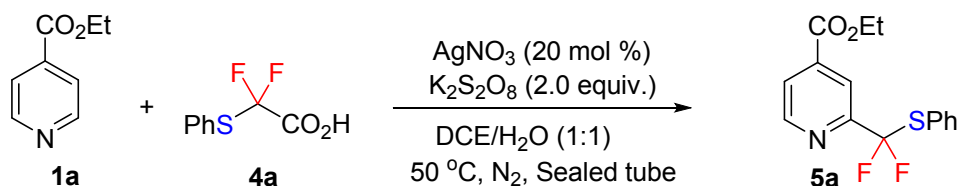

To a sealed tube equipped with a stir bar were added **1a** (181.2 mg, 1.2 mmol, 1.0 equiv),  $\text{AgNO}_3$  (40.8 mg, 0.24 mmol, 20 mol %), and  $\text{K}_2\text{S}_2\text{O}_8$  (648.7 mg, 2.4 mmol, 2.0 equiv). The tube was evacuated and backfilled with pure  $\text{N}_2$  for three times. Then phenylthiodifluoroacetic acid **4a** (735.1 mg, 3.6 mmol, 3.0 equiv) in DCE/ $\text{H}_2\text{O}$  (6.0/6.0 mL) were added. The tube was sealed and the mixture was heated at  $50^\circ\text{C}$  in an oil bath for 20 h. After the reaction was complete, saturated  $\text{NaHCO}_3$  solution was added. The resulting mixture was extracted with ethyl acetate for three times. The combined organic layer was washed with brine, dried over anhydrous  $\text{Na}_2\text{SO}_4$ , and concentrated under reduced pressure. The resulting residue was purified by silica gel flash column chromatography (hexane/ $\text{EtOAc}$  = 10:1) to give **5a** (273.9 mg, 74%) as a yellowish liquid.

## 7. Competition Experiments

*Under AgNO<sub>3</sub>/selectfluor reaction system*

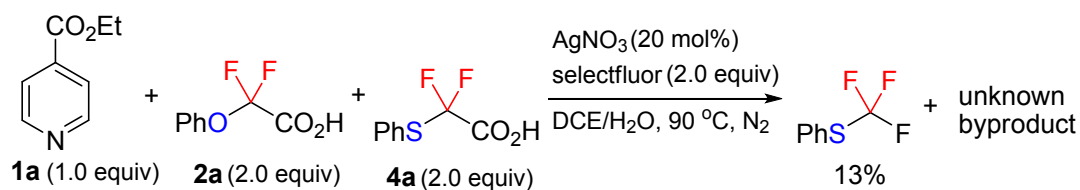

To a sealed tube equipped with a stir bar were added **1a** (90.7 mg, 0.6 mmol, 1.0 equiv), AgNO<sub>3</sub> (20.4 mg, 0.12 mmol, 20 mol%), and selectfluor (425.1 mg, 1.2 mmol, 2.0 equiv). The tube was evacuated and backfilled with pure N<sub>2</sub> for three times. Then phenoxydifluoroacetic acid **2a** (225.7 mg, 1.2 mmol, 2.0 equiv) and phenylthiodifluoroacetic acid **4a** (245.0 mg, 1.2 mmol, 2.0 equiv) in DCE/H<sub>2</sub>O (3.0/3.0 mL) were added. The tube was sealed and the mixture was heated at 90 °C in an oil bath for 20 h. The internal standard PhCF<sub>3</sub> (73.7 μL, 0.6 mmol, 1.0 equiv) was added, and the solution was then analyzed by <sup>19</sup>F NMR spectroscopy. The <sup>19</sup>F NMR spectroscopy indicated the formation of PhSCF<sub>3</sub> (13%) and an unknown byproduct.

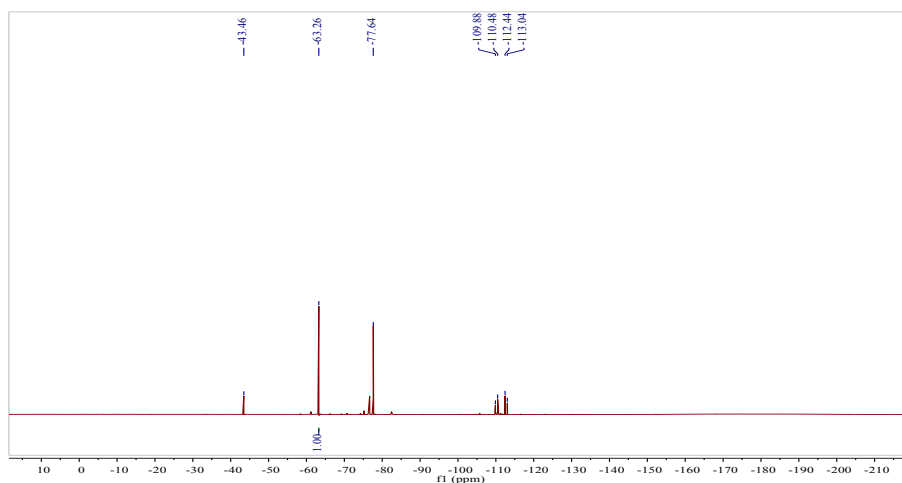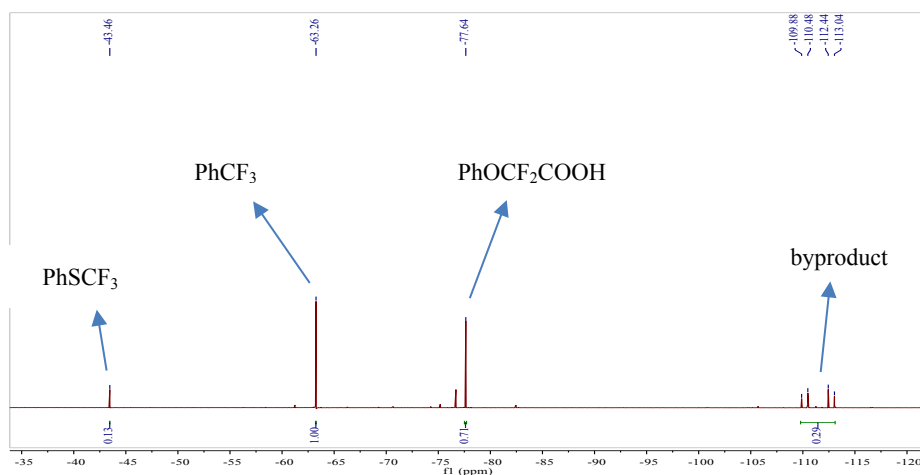

Under  $\text{AgNO}_3/\text{K}_2\text{S}_2\text{O}_8$  reaction system

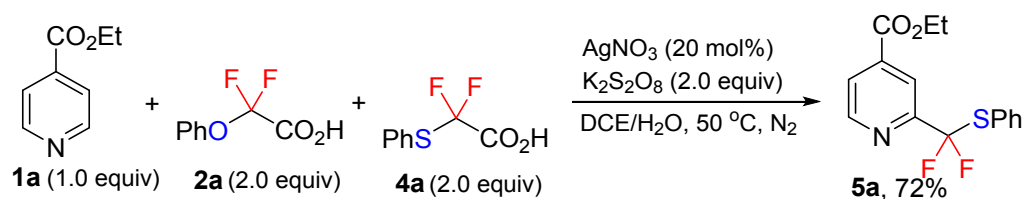

To a sealed tube equipped with a stir bar were added **1a** (90.7 mg, 0.6 mmol, 1.0 equiv),  $\text{AgNO}_3$  (20.4 mg, 0.12 mmol, 20 mol %), and  $\text{K}_2\text{S}_2\text{O}_8$  (324.4 mg, 1.2 mmol, 2.0 equiv). The tube was evacuated and backfilled with pure  $\text{N}_2$  for three times. Then phenoxydifluoroacetic acid **2a** (225.7 mg, 1.2 mmol, 2.0 equiv) and phenylthiodifluoroacetic acid **4a** (245.0 mg, 1.2 mmol, 2.0 equiv) in  $\text{DCE}/\text{H}_2\text{O}$  (3.0/3.0 mL) were added. The tube was sealed and the mixture was heated at 50  $^\circ\text{C}$  in an oil bath for 20 h. The internal standard  $\text{PhCF}_3$  (73.7  $\mu\text{L}$ , 0.6 mmol, 1.0 equiv) was added, and the solution was then analyzed by  $^{19}\text{F}$  NMR spectroscopy. The  $^{19}\text{F}$  NMR spectroscopy indicated the formation of **5a** (72%).

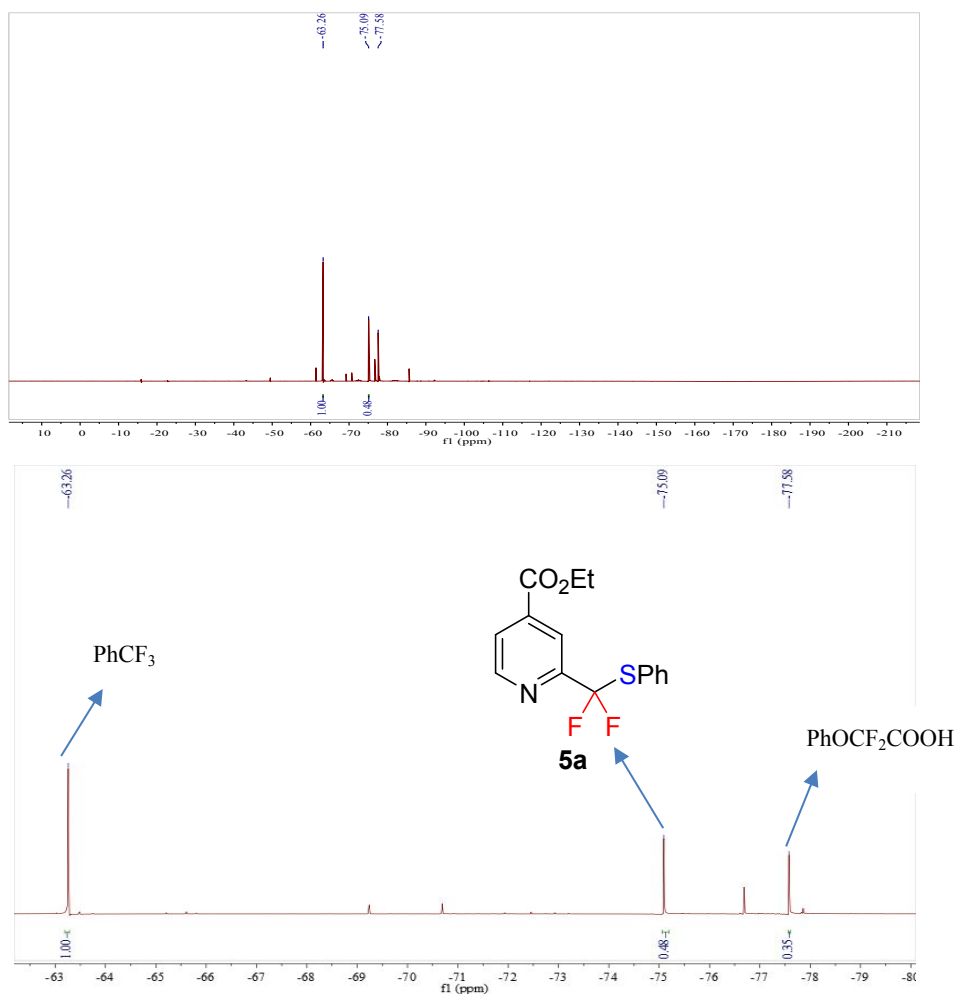



## 8. Radical Inhibition Experiments

### *Aryloxydifluoromethylation in the presence of TEMPO*

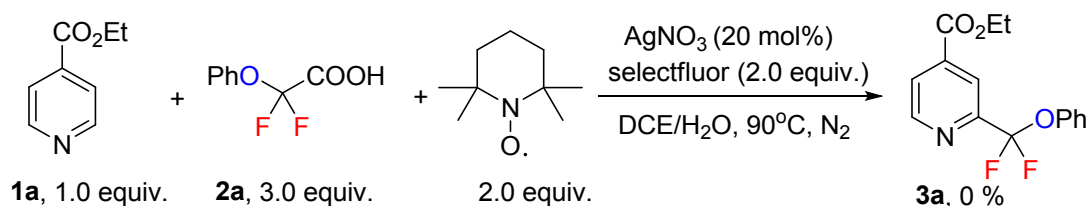

To a sealed tube equipped with a stir bar were added **1a** (30.2 mg, 0.2 mmol, 1.0 equiv), TEMPO (62.5 mg, 0.4 mmol, 2.0 equiv),  $\text{AgNO}_3$  (6.8 mg, 0.04 mmol, 20 mol%), and selectfluor (141.7 mg, 0.4 mmol, 2.0 equiv). The tube was evacuated and backfilled with pure  $\text{N}_2$  for three times. Then phenoxydifluoroacetic acid **2a** (112.8 mg, 0.6 mmol, 3.0 equiv) in  $\text{DCE}/\text{H}_2\text{O}$  (1.0/1.0 mL) were added. The tube was sealed and the mixture was heated at  $90^\circ\text{C}$  in an oil bath for 20 h. The internal standard  $\text{PhCF}_3$  (24.6  $\mu\text{L}$ , 0.2 mmol, 1.0 equiv) was added, and the solution was then analyzed by  $^{19}\text{F}$  NMR spectroscopy. The  $^{19}\text{F}$  NMR spectroscopy indicated that the desired product **3a** was completely inhibited in the presence of 2.0 equiv. of TEMPO.

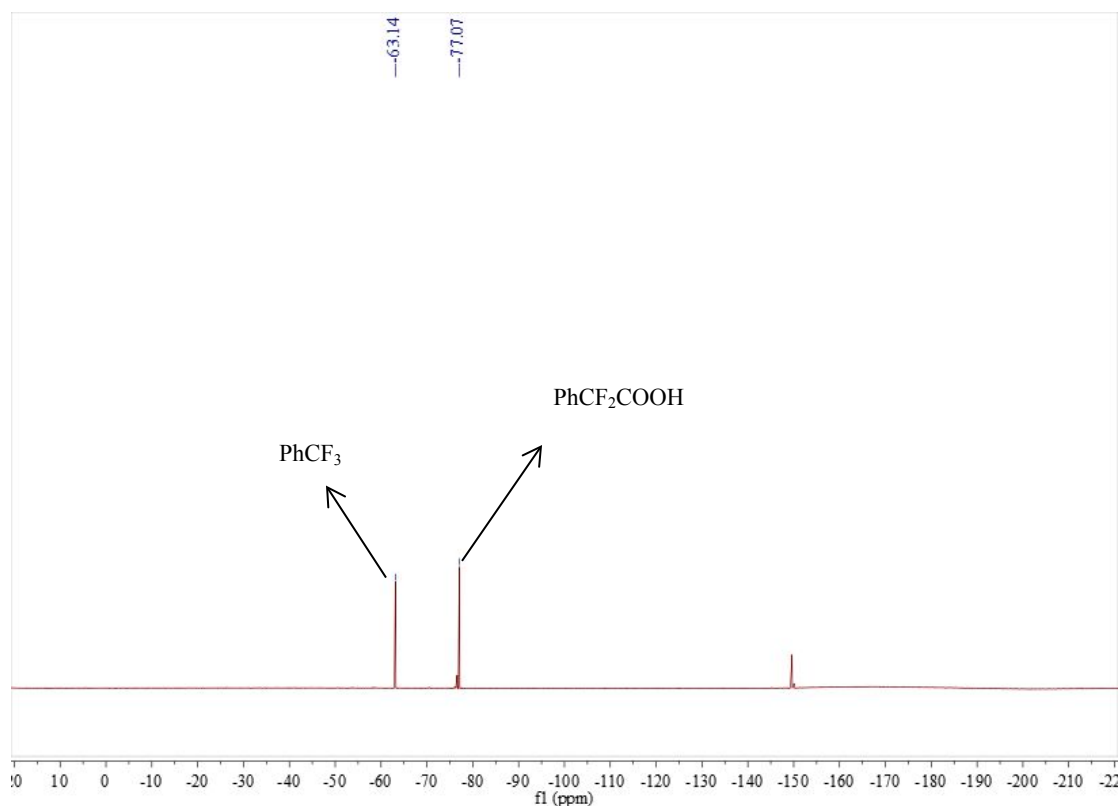

*Arylthiodifluoromethylation in the presence of TEMPO*

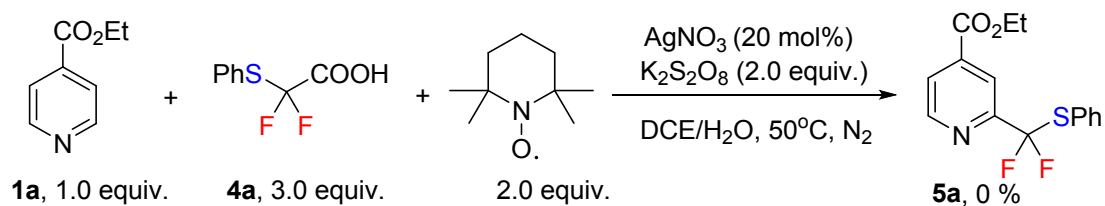

To a sealed tube equipped with a stir bar were added **1a** (30.2 mg, 0.2 mmol, 1.0 equiv), TEMPO (62.5 mg, 0.4 mmol, 2.0 equiv), AgNO<sub>3</sub> (6.8 mg, 0.04 mmol, 20 mol%), and K<sub>2</sub>S<sub>2</sub>O<sub>8</sub> (108.1 mg, 0.4 mmol, 2.0 equiv). The tube was evacuated and backfilled with pure N<sub>2</sub> for three times. Then phenoxydifluoroacetic acid **4a** (122.4 mg, 0.6 mmol, 3.0 equiv) in DCE/H<sub>2</sub>O (1.0/1.0 mL) were added. The tube was sealed and the mixture was heated at 50 °C in an oil bath for 20 h. The internal standard PhCF<sub>3</sub> (24.6 μL, 0.2 mmol, 1.0 equiv) was added, and the solution was then analyzed by <sup>19</sup>F NMR spectroscopy. The <sup>19</sup>F NMR spectroscopy indicated that the desired product **5a** was completely inhibited in the presence of 2.0 equiv. of TEMPO.

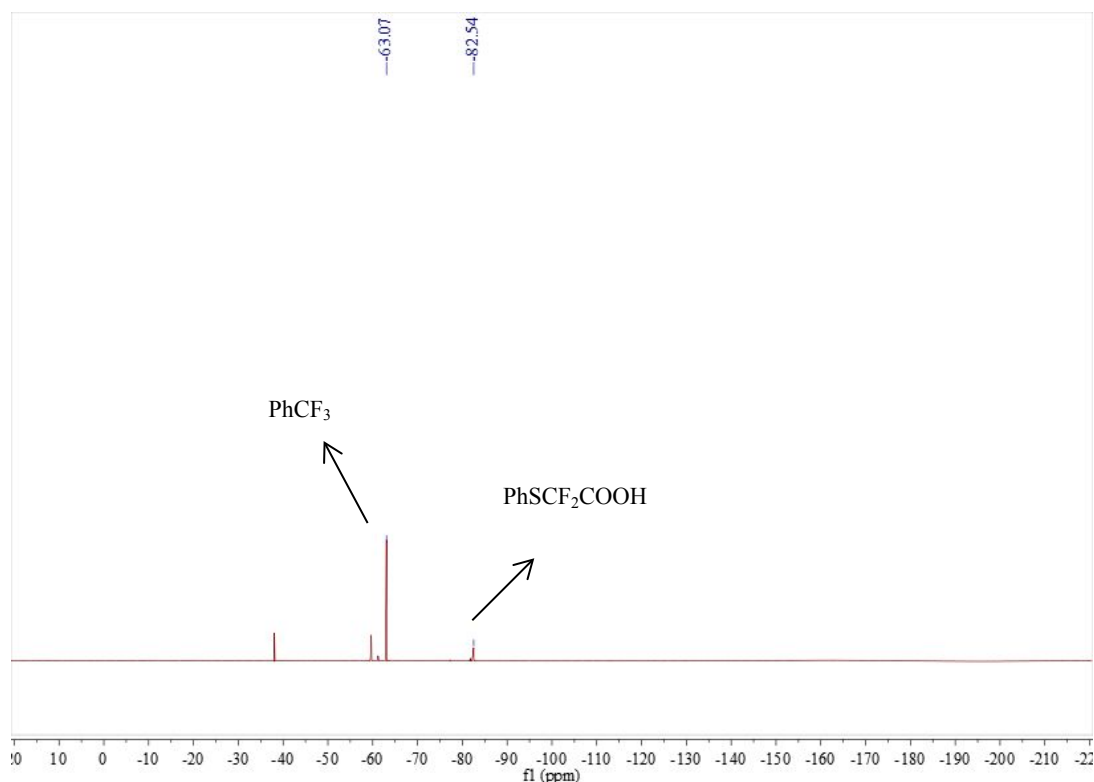

## 9. ORTEP Drawing of the X-Ray Crystallographic Structure of Product 5kc

The crystals were obtained from a solution of dichloromethane and hexane upon slow volatilization. The X-ray intensity data were measured at 293(2) K, on a Rigaku AFC7R diffractometer.

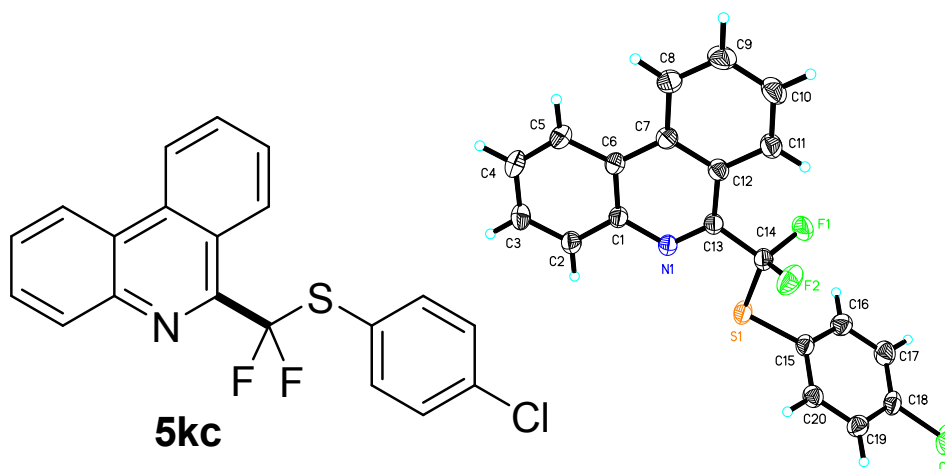

The crystal structure has been deposited at the Cambridge Crystallographic Data Center and allocated the deposition number CCDC 2001370. The thermal ellipsoids are shown at the 30% probability level. This data can be obtained free of charge from the Cambridge Crystallographic Data Center via [www.ccdc.cam.ac.uk/data\\_request/cif](http://www.ccdc.cam.ac.uk/data_request/cif)

## Crystal data and structure refinement for 5kc

|                                   |                                                       |                              |
|-----------------------------------|-------------------------------------------------------|------------------------------|
| Identification code               | <b>5kc</b>                                            |                              |
| Empirical formula                 | C <sub>20</sub> H <sub>12</sub> Cl F <sub>2</sub> N S |                              |
| Formula weight                    | 371.82                                                |                              |
| Temperature                       | 293(2) K                                              |                              |
| Wavelength                        | 0.71073 Å                                             |                              |
| Crystal system                    | Triclinic                                             |                              |
| Space group                       | P -1                                                  |                              |
| Unit cell dimensions              | a = 8.2778(12) Å                                      | $\alpha = 71.910(4)^\circ$ . |
|                                   | b = 9.4259(13) Å                                      | $\beta = 80.287(4)^\circ$ .  |
|                                   | c = 11.5784(17) Å                                     | $\gamma = 85.508(4)^\circ$ . |
| Volume                            | 846.1(2) Å <sup>3</sup>                               |                              |
| Z                                 | 2                                                     |                              |
| Density (calculated)              | 1.459 Mg/m <sup>3</sup>                               |                              |
| Absorption coefficient            | 0.371 mm <sup>-1</sup>                                |                              |
| F(000)                            | 380                                                   |                              |
| Crystal size                      | 0.200 x 0.160 x 0.130 mm <sup>3</sup>                 |                              |
| Theta range for data collection   | 2.884 to 25.998°.                                     |                              |
| Index ranges                      | -10 ≤ h ≤ 10, -11 ≤ k ≤ 11, -14 ≤ l ≤ 14              |                              |
| Reflections collected             | 20622                                                 |                              |
| Independent reflections           | 3286 [R(int) = 0.0320]                                |                              |
| Completeness to theta = 25.242°   | 98.7 %                                                |                              |
| Absorption correction             | Semi-empirical from equivalents                       |                              |
| Max. and min. transmission        | 0.7456 and 0.6652                                     |                              |
| Refinement method                 | Full-matrix least-squares on F <sup>2</sup>           |                              |
| Data / restraints / parameters    | 3286 / 0 / 227                                        |                              |
| Goodness-of-fit on F <sup>2</sup> | 1.048                                                 |                              |
| Final R indices [I > 2sigma(I)]   | R1 = 0.0350, wR2 = 0.0870                             |                              |
| R indices (all data)              | R1 = 0.0402, wR2 = 0.0907                             |                              |
| Extinction coefficient            | 0.025(8)                                              |                              |
| Largest diff. peak and hole       | 0.233 and -0.253 e.Å <sup>-3</sup>                    |                              |

## 10. Copies of $^1\text{H}$ , $^{19}\text{F}$ , and $^{13}\text{C}$ NMR Spectra for the Products

$^1\text{H}$  NMR (400 MHz,  $\text{CDCl}_3$ )

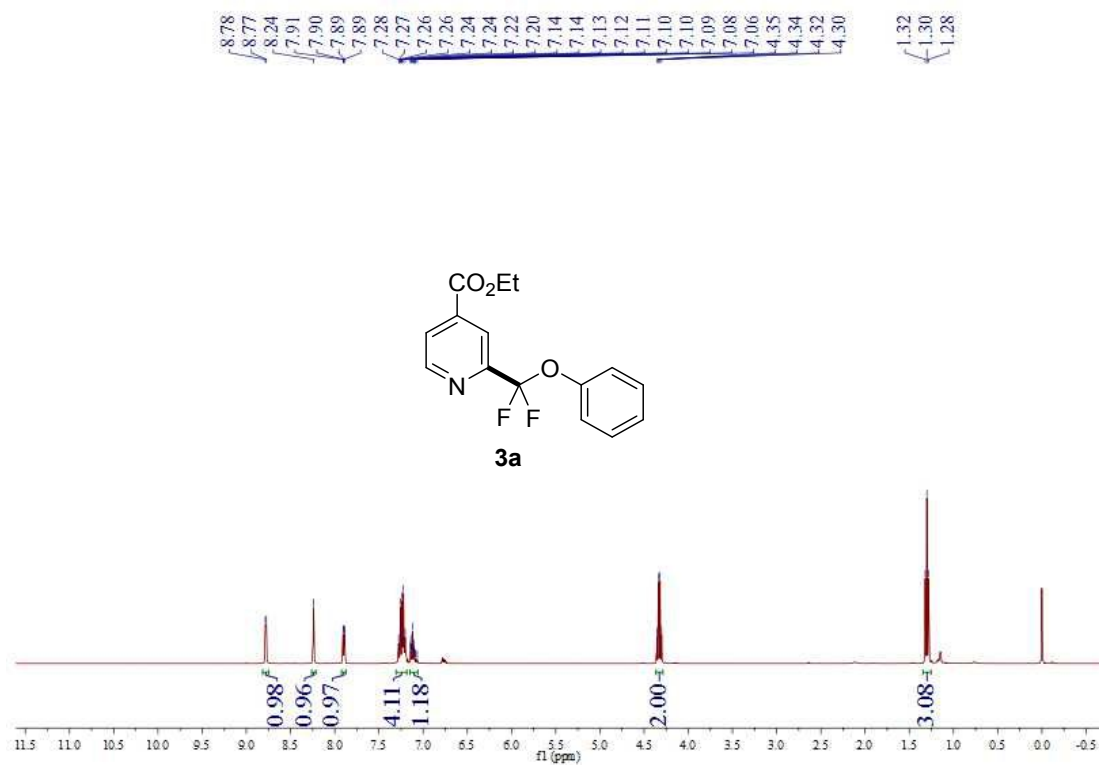

$^{13}\text{C}$  NMR (101 MHz,  $\text{CDCl}_3$ )

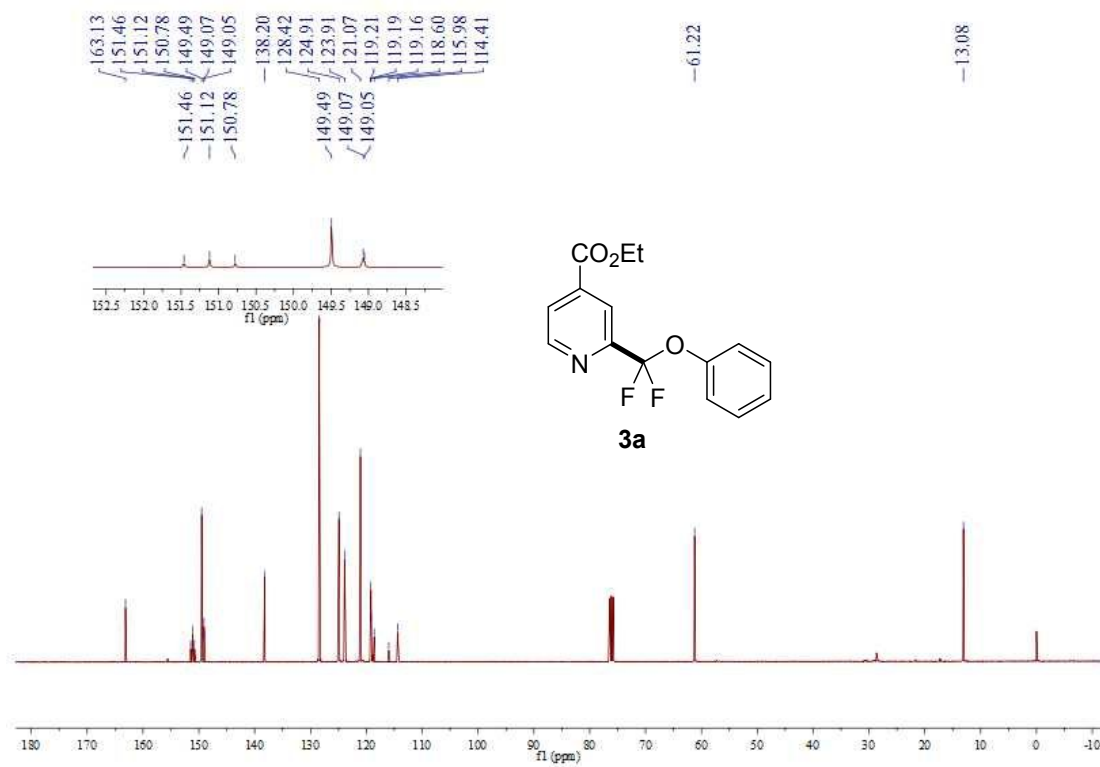

$^{19}\text{F}$  NMR (377 MHz,  $\text{CDCl}_3$ )

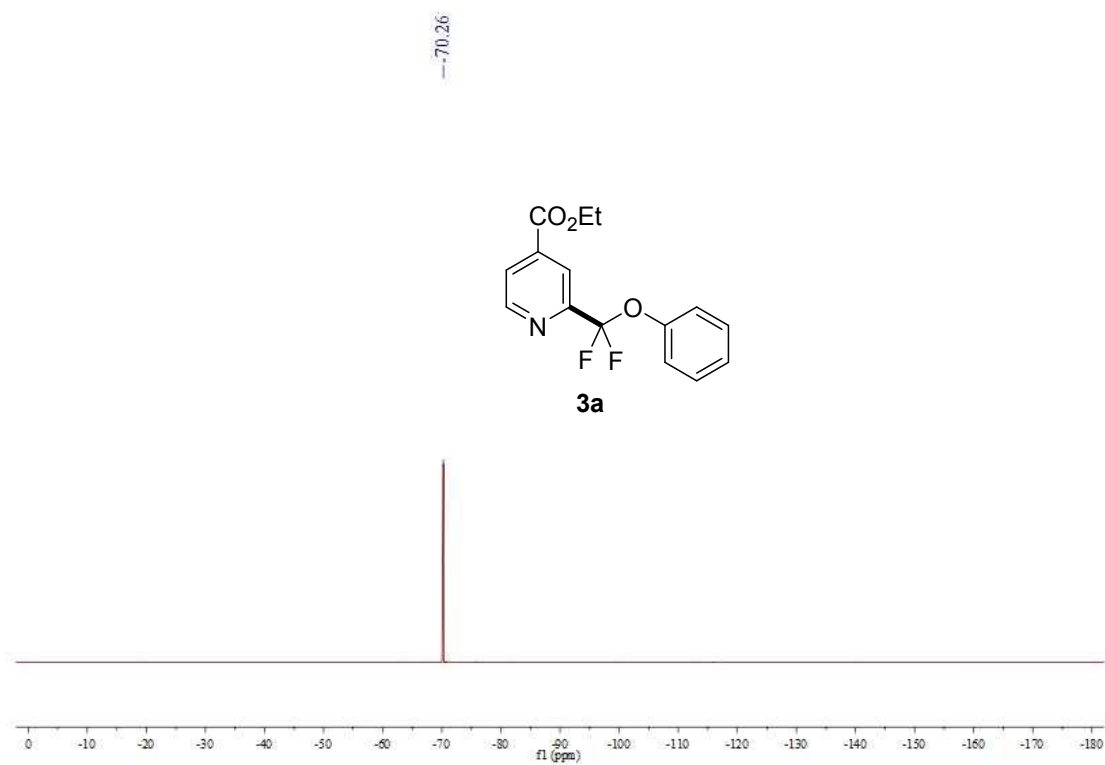

$^1\text{H}$  NMR (400 MHz,  $\text{CDCl}_3$ )

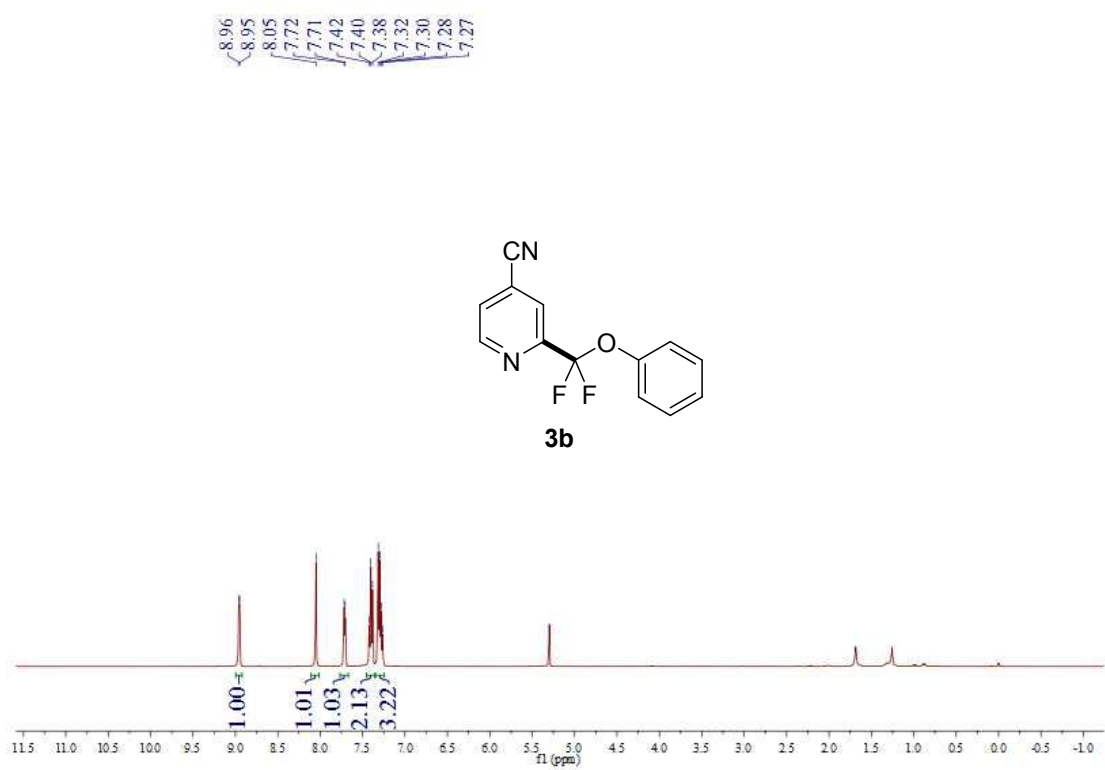

$^{13}\text{C}$  NMR (101 MHz,  $\text{CDCl}_3$ )

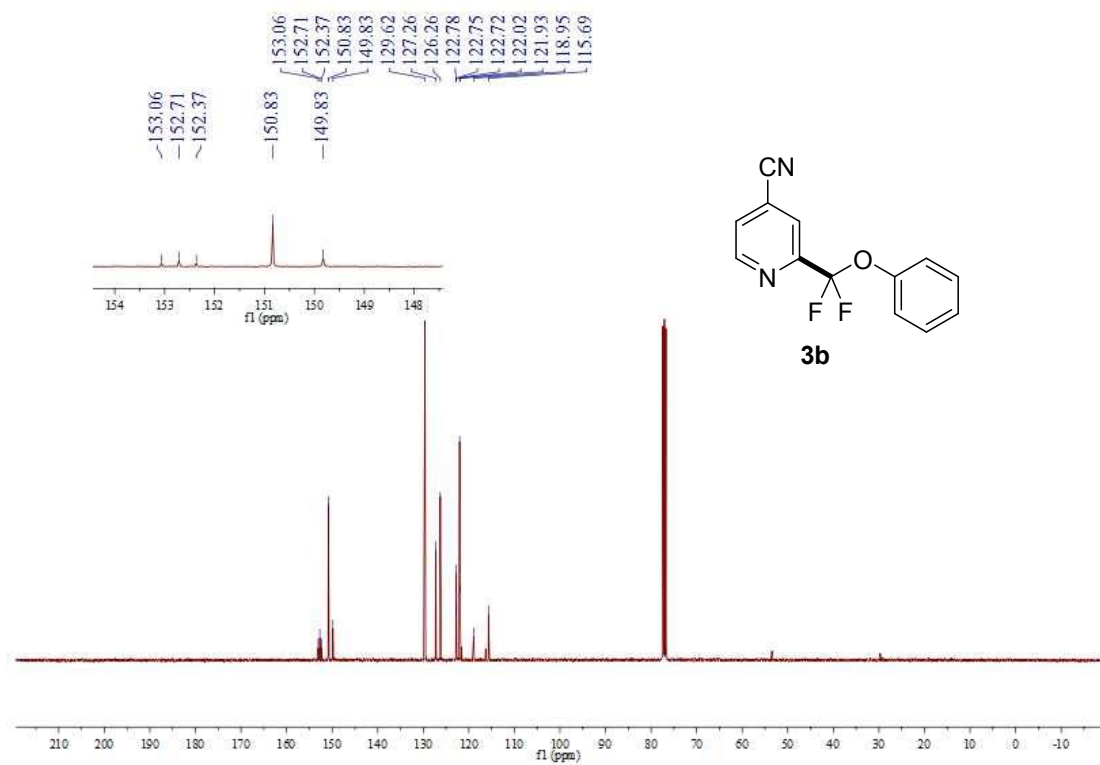

$^{19}\text{F}$  NMR (377 MHz,  $\text{CDCl}_3$ )

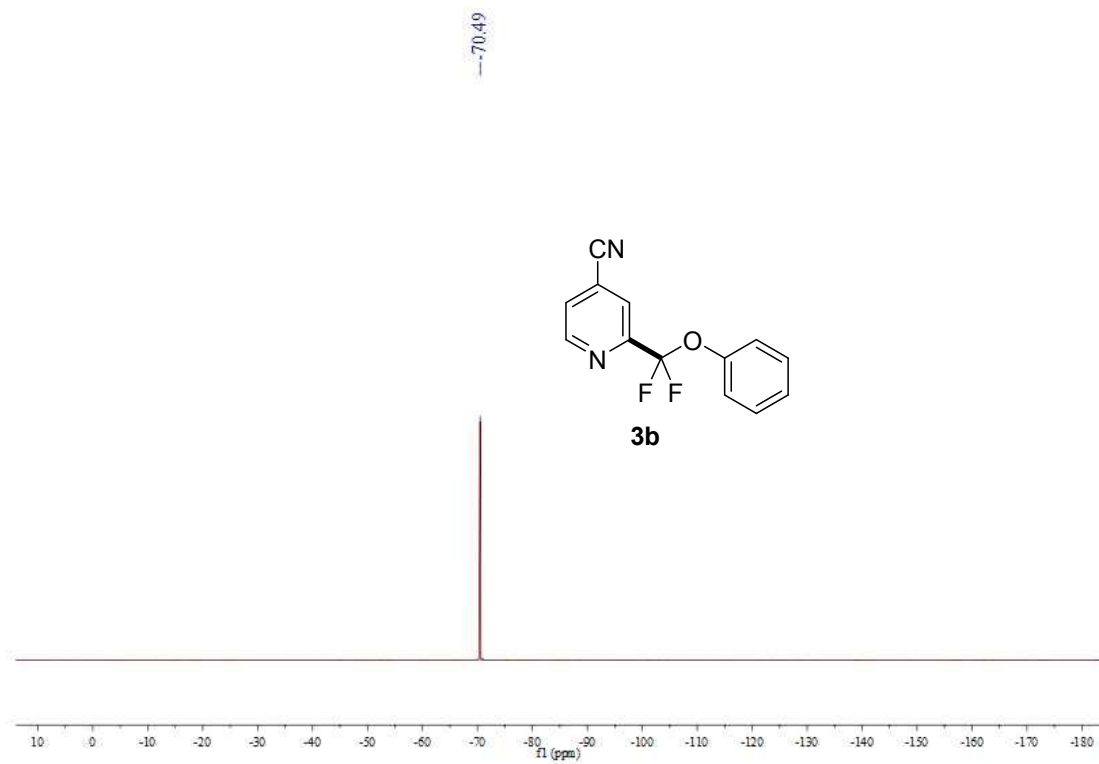

$^1\text{H}$  NMR (400 MHz,  $\text{CDCl}_3$ )

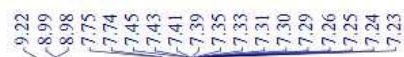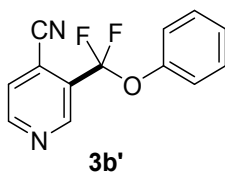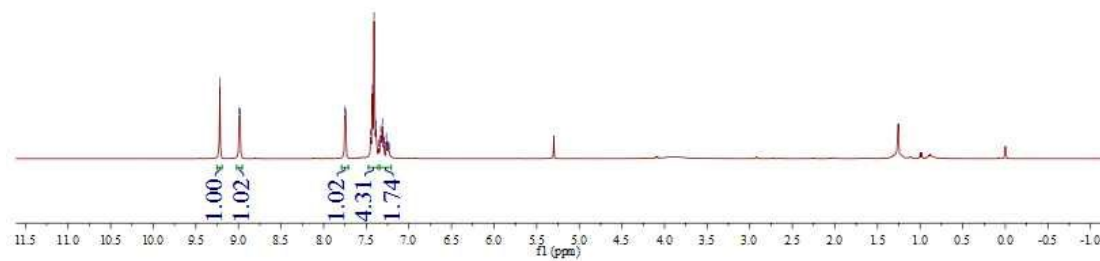

$^{13}\text{C}$  NMR (101 MHz,  $\text{CDCl}_3$ )

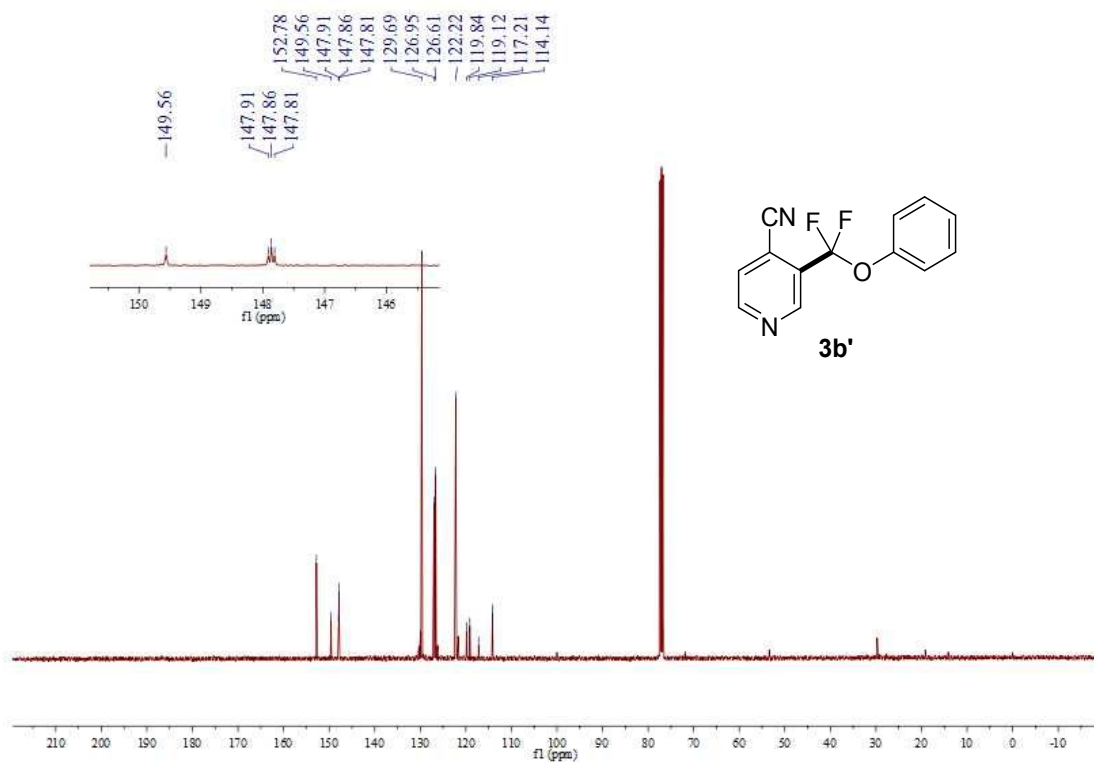



$^{19}\text{F}$  NMR (377 MHz,  $\text{CDCl}_3$ )

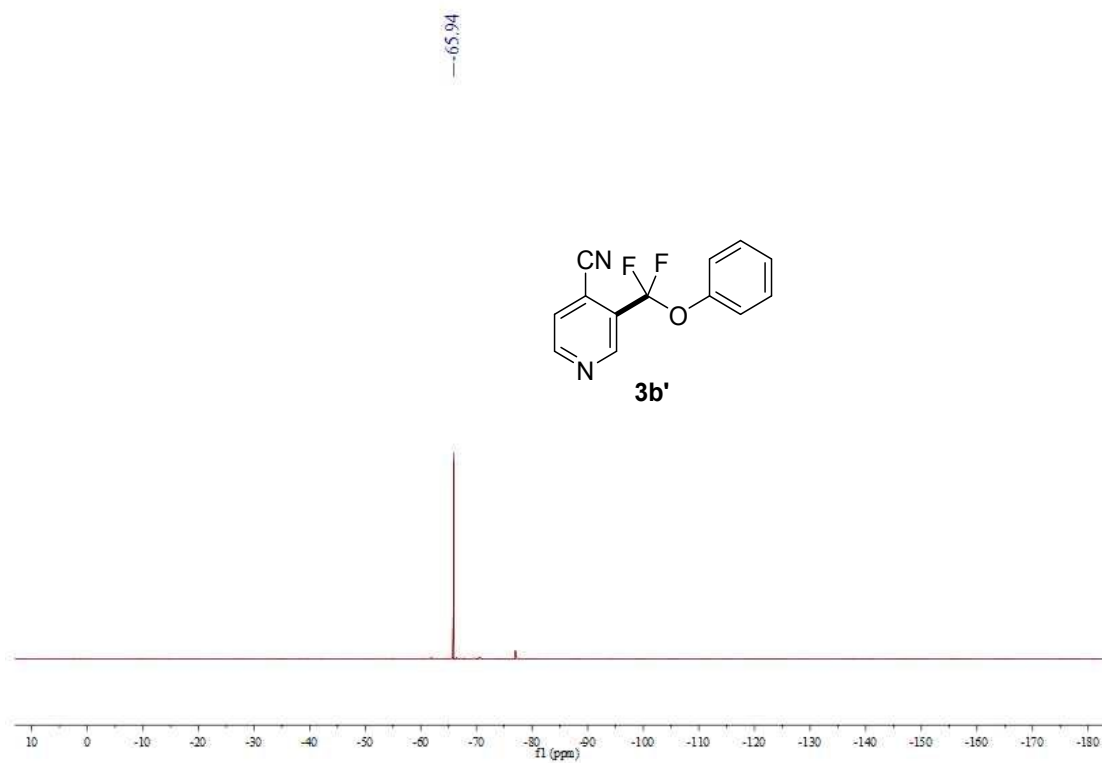

$^1\text{H}$  NMR (400 MHz,  $\text{CDCl}_3$ )

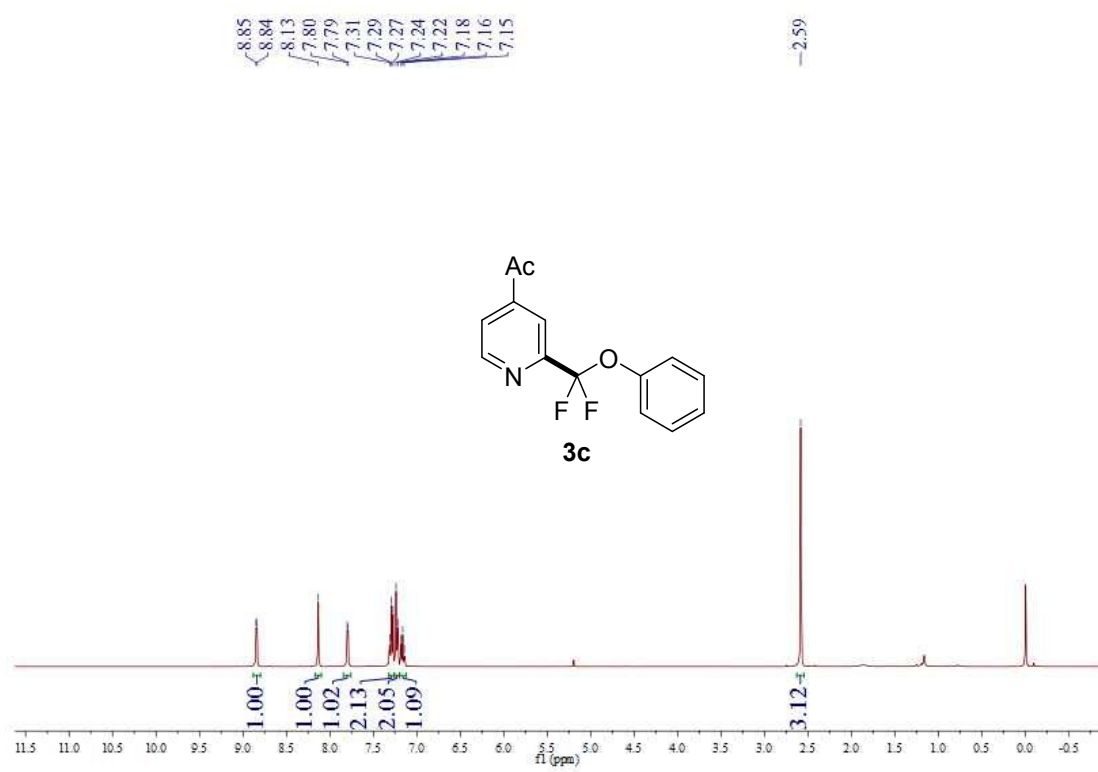

$^{13}\text{C}$  NMR (101 MHz,  $\text{CDCl}_3$ )

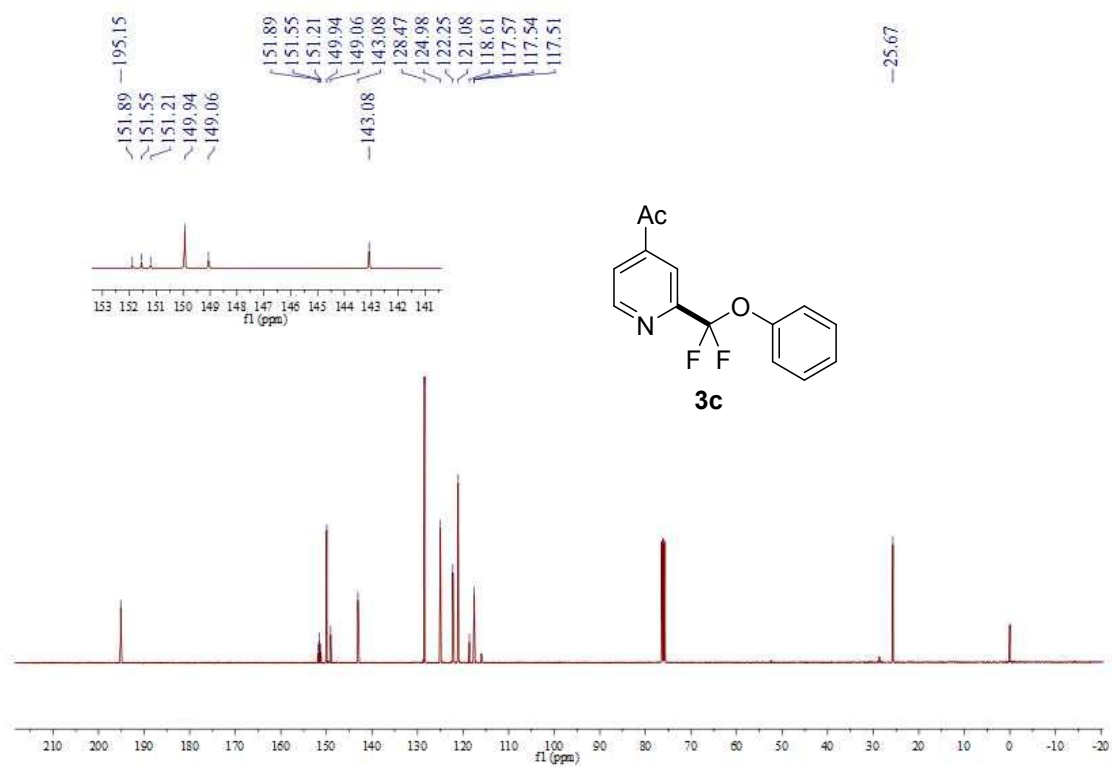

$^{19}\text{F}$  NMR (377 MHz,  $\text{CDCl}_3$ )

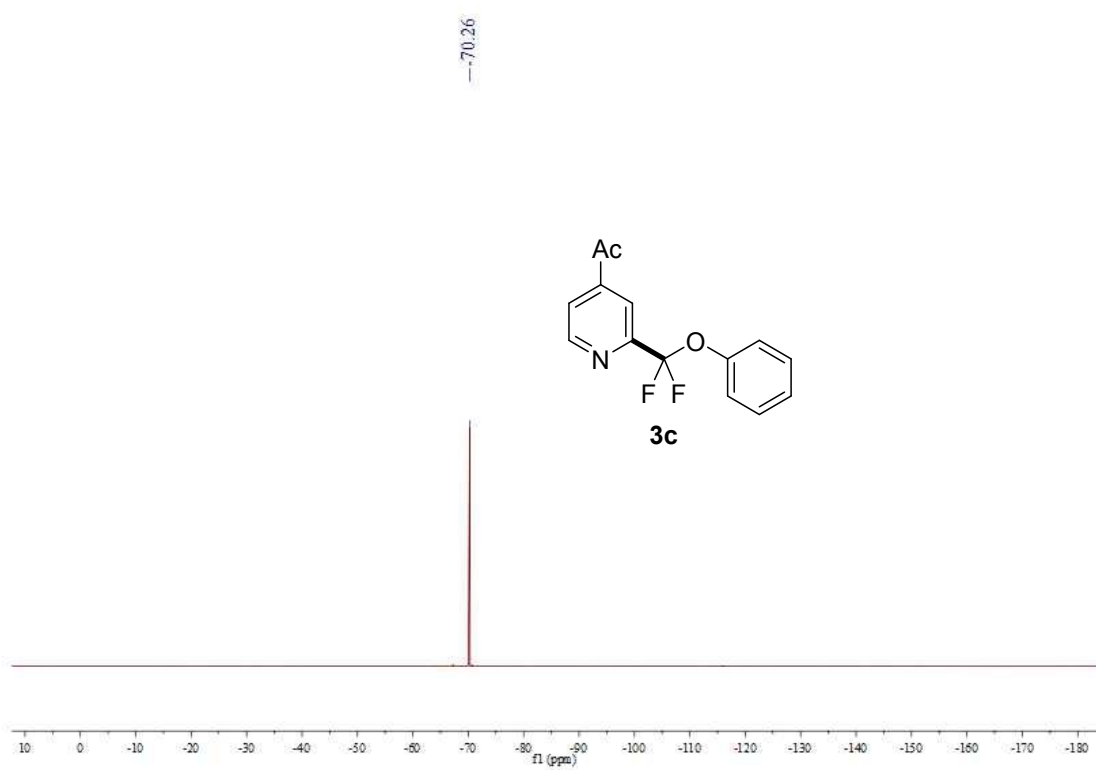

$^1\text{H}$  NMR (400 MHz,  $\text{CDCl}_3$ )

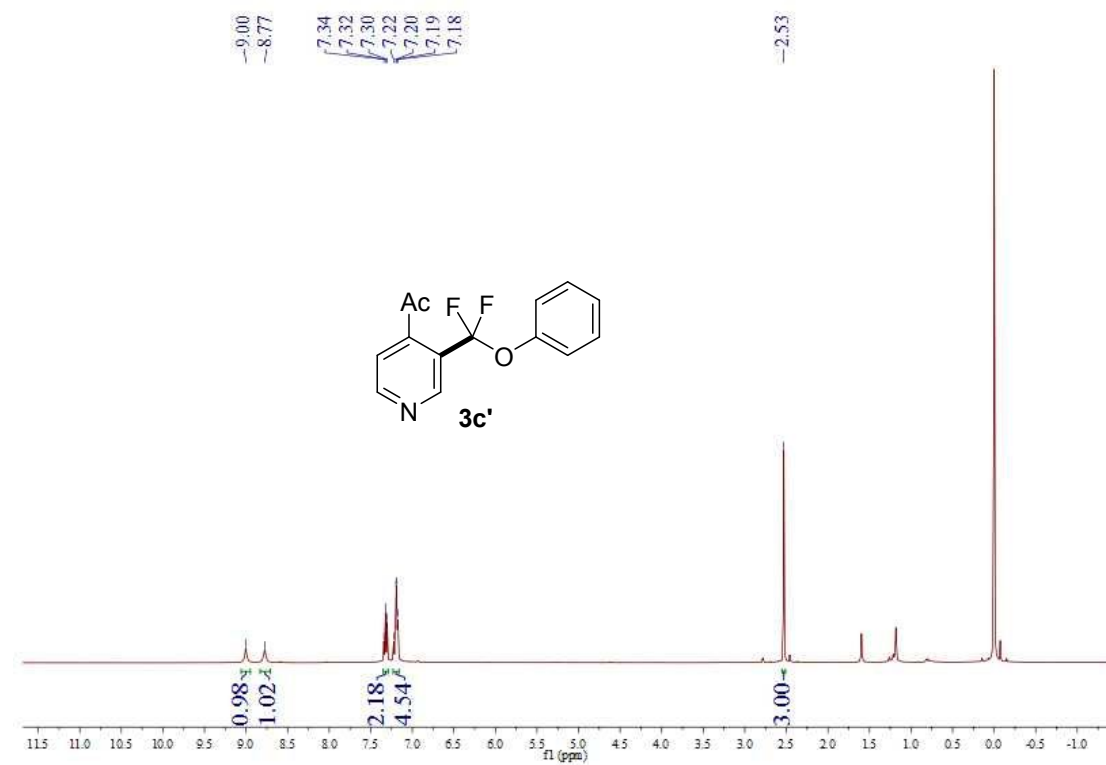

$^{13}\text{C}$  NMR (101 MHz,  $\text{CDCl}_3$ )

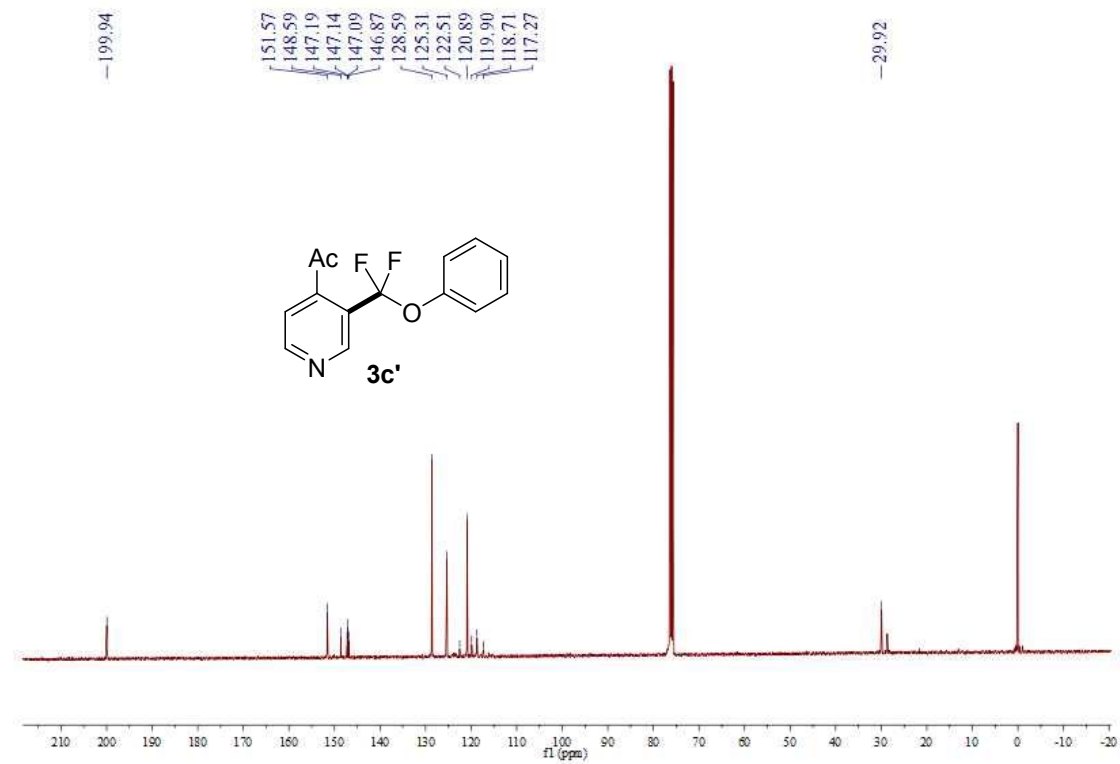

$^{19}\text{F}$  NMR (377 MHz,  $\text{CDCl}_3$ )

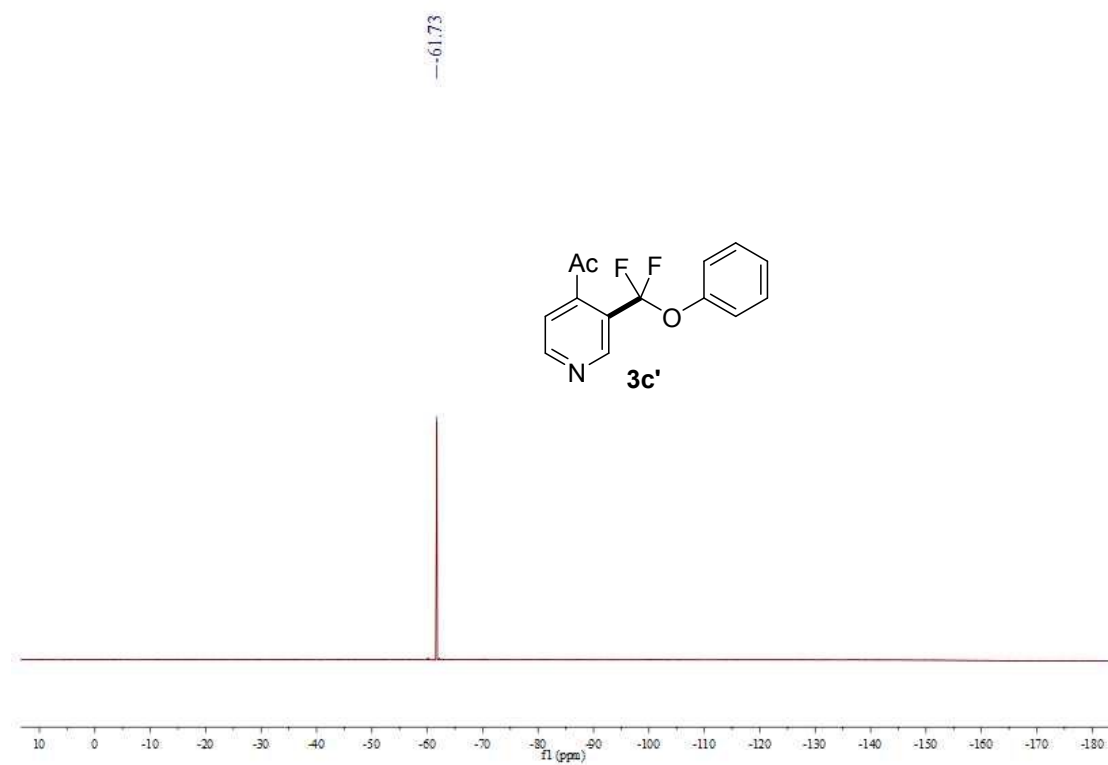

$^1\text{H}$  NMR (400 MHz,  $\text{CDCl}_3$ )

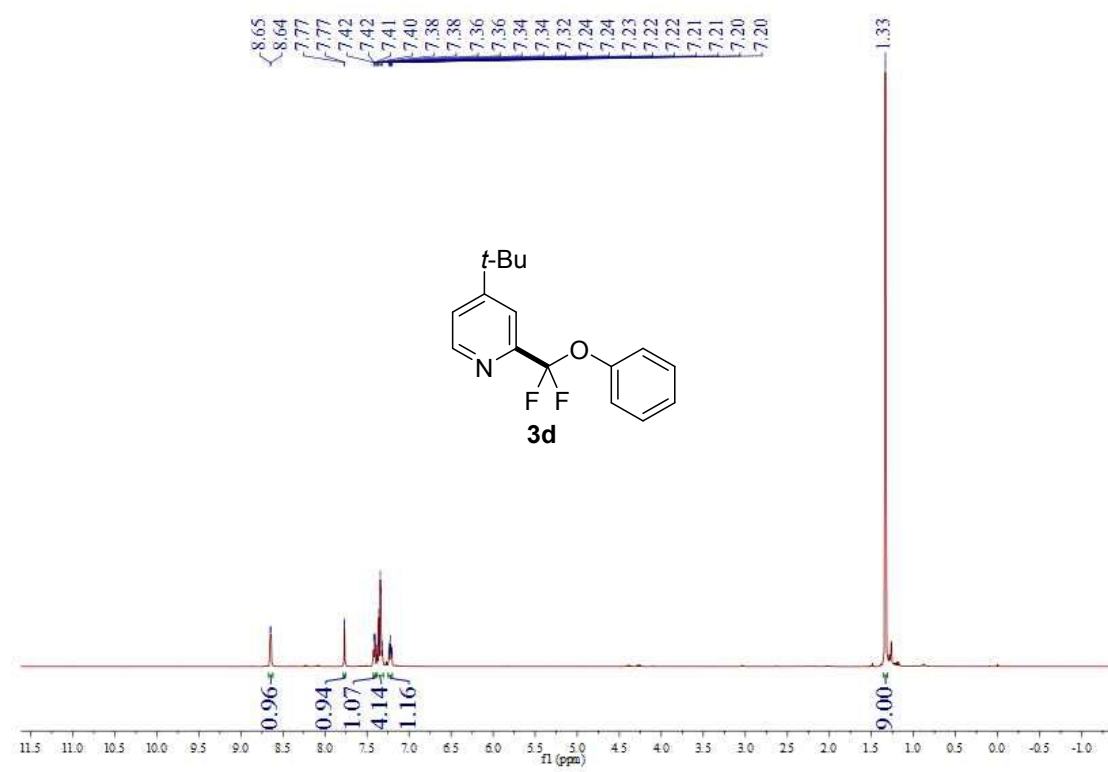

$^{13}\text{C}$  NMR (101 MHz,  $\text{CDCl}_3$ )

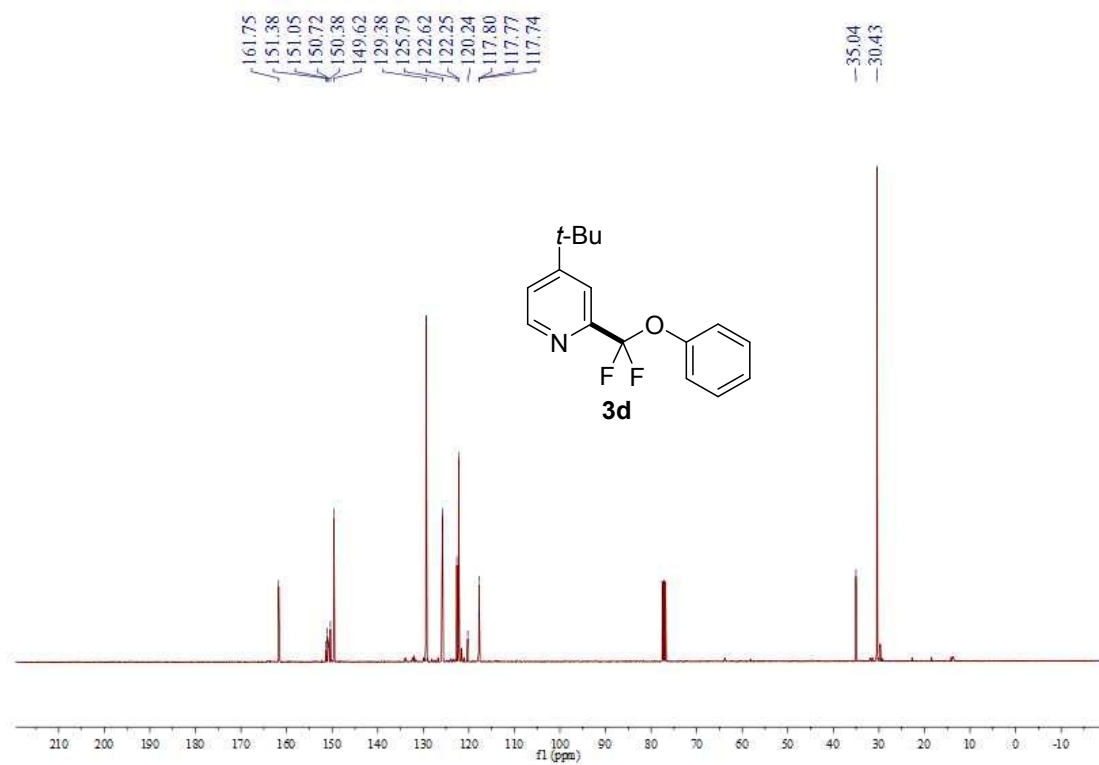

$^{19}\text{F}$  NMR (377 MHz,  $\text{CDCl}_3$ )

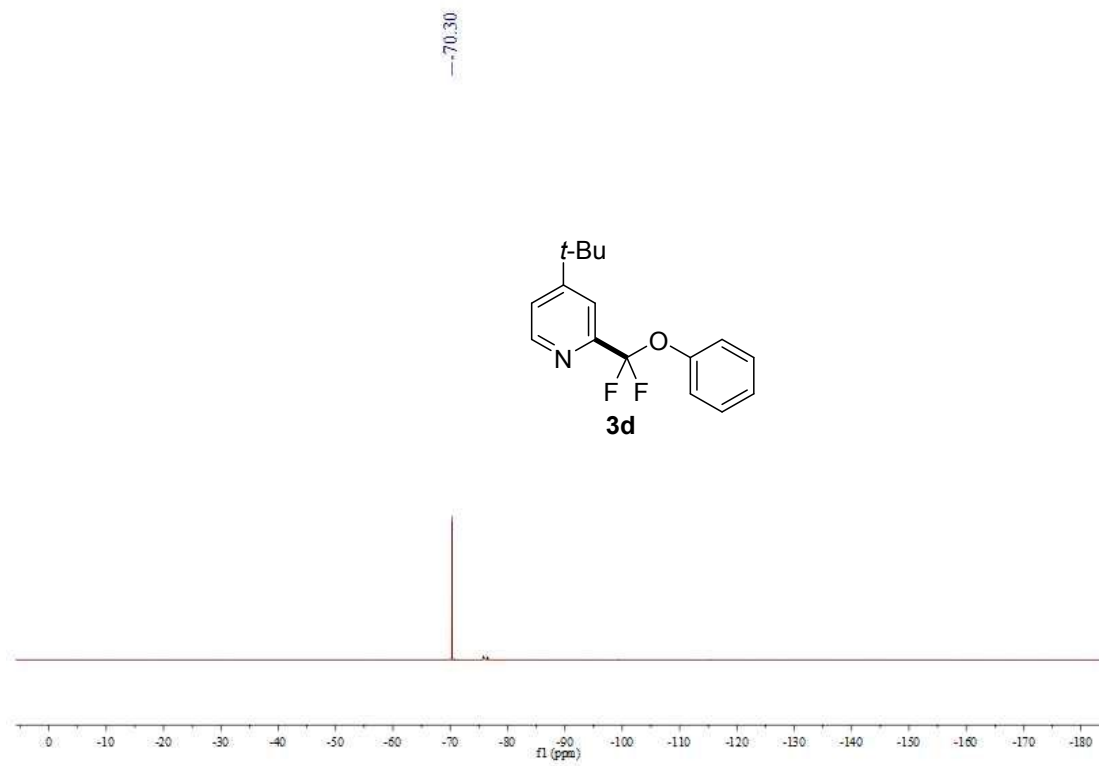

$^1\text{H}$  NMR (400 MHz,  $\text{CDCl}_3$ )

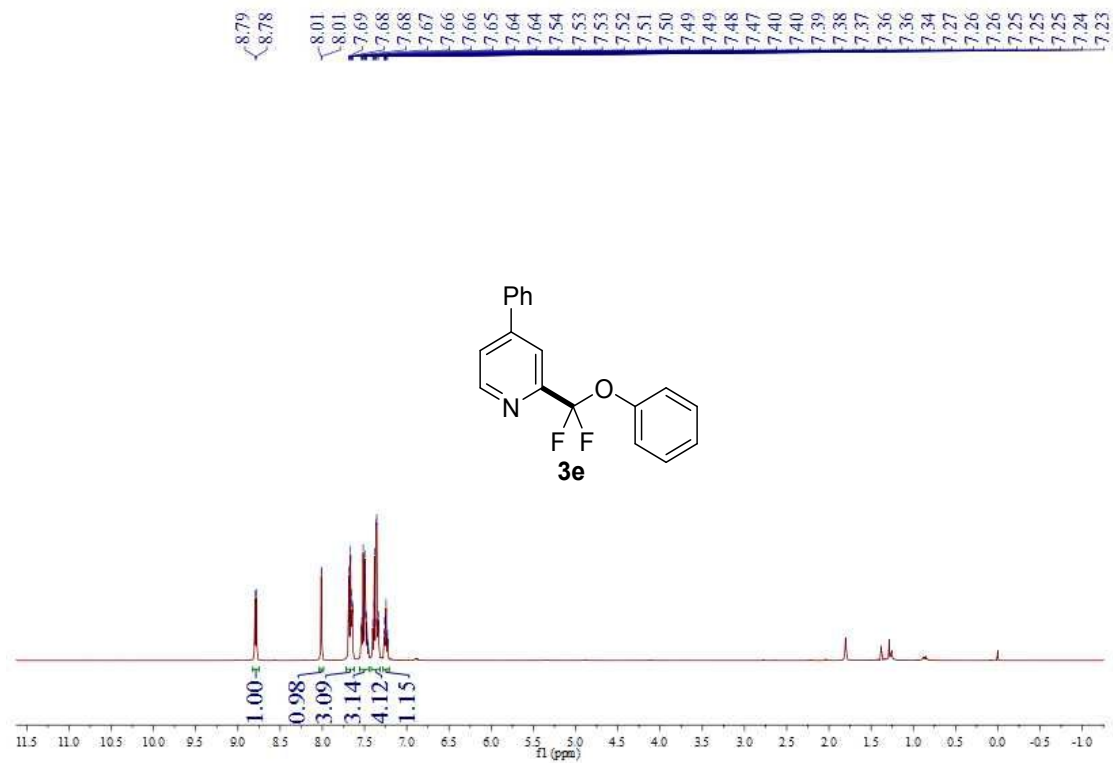

$^{13}\text{C}$  NMR (101 MHz,  $\text{CDCl}_3$ )

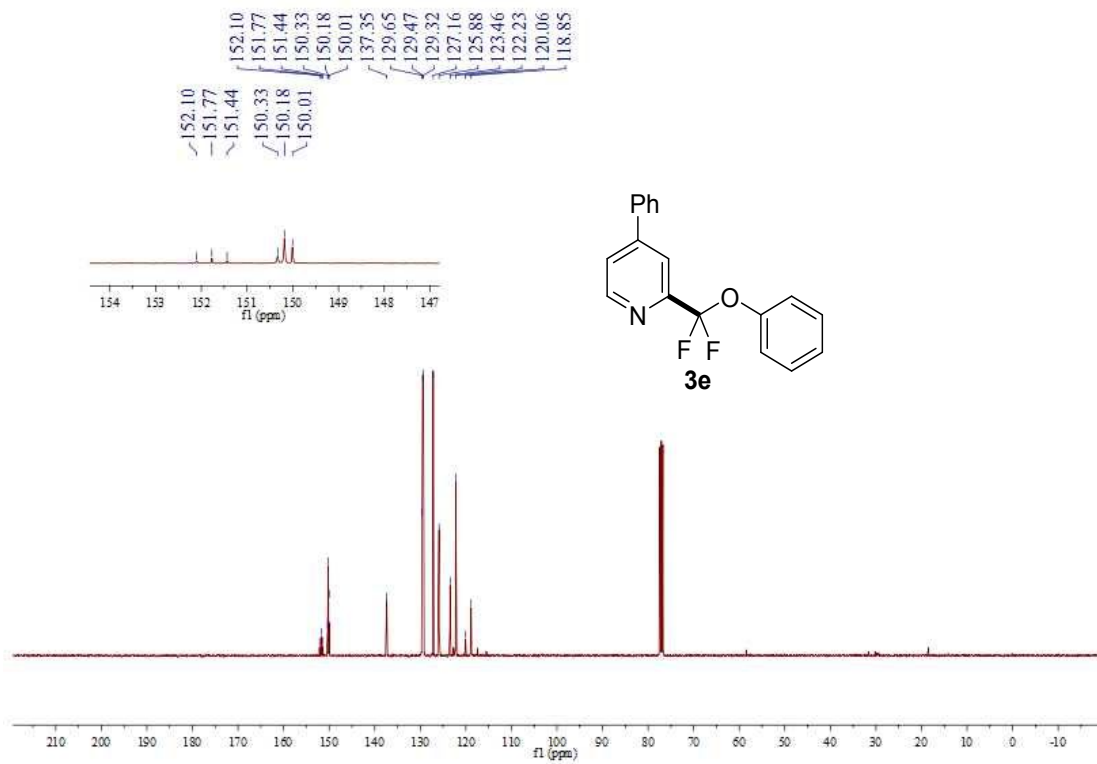

$^{19}\text{F}$  NMR (377 MHz,  $\text{CDCl}_3$ )

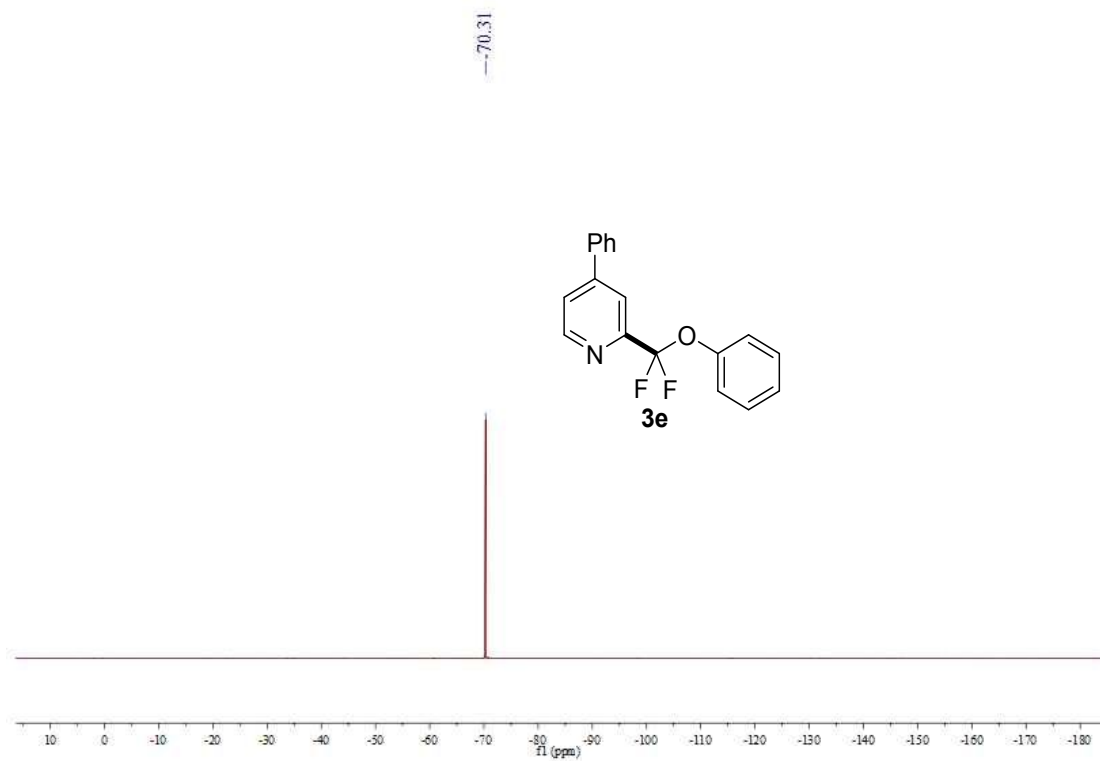

$^1\text{H}$  NMR (400 MHz,  $\text{CDCl}_3$ )

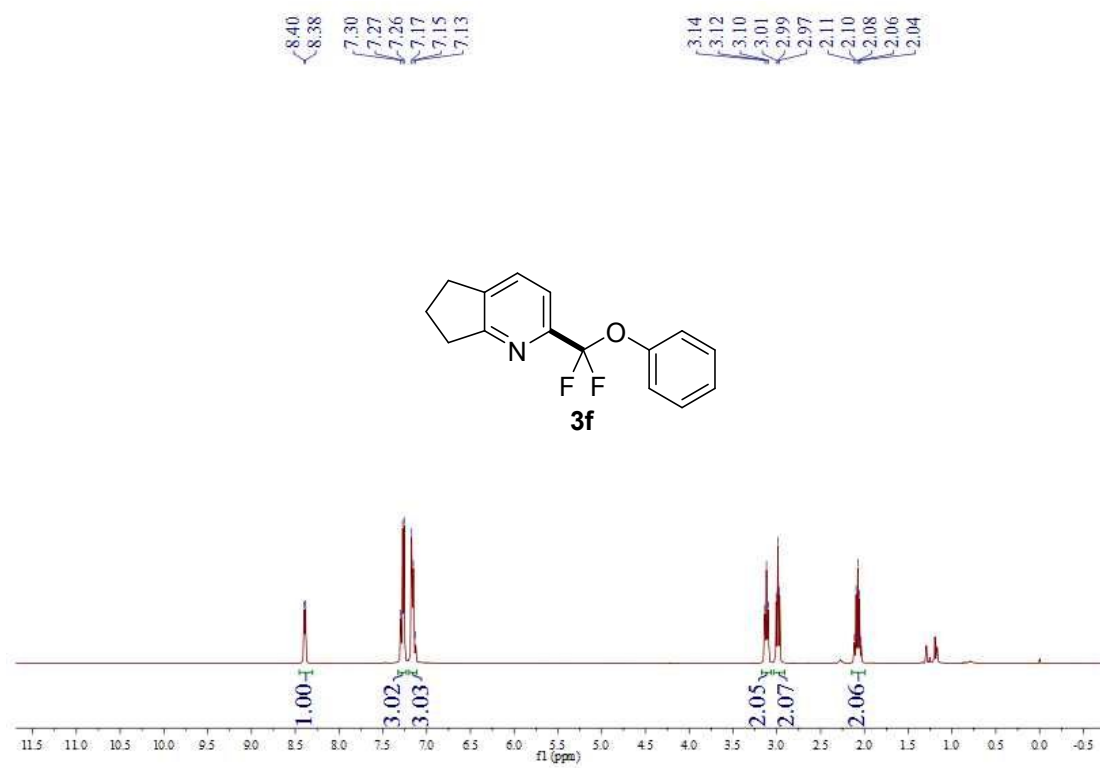

$^{13}\text{C}$  NMR (101 MHz,  $\text{CDCl}_3$ )

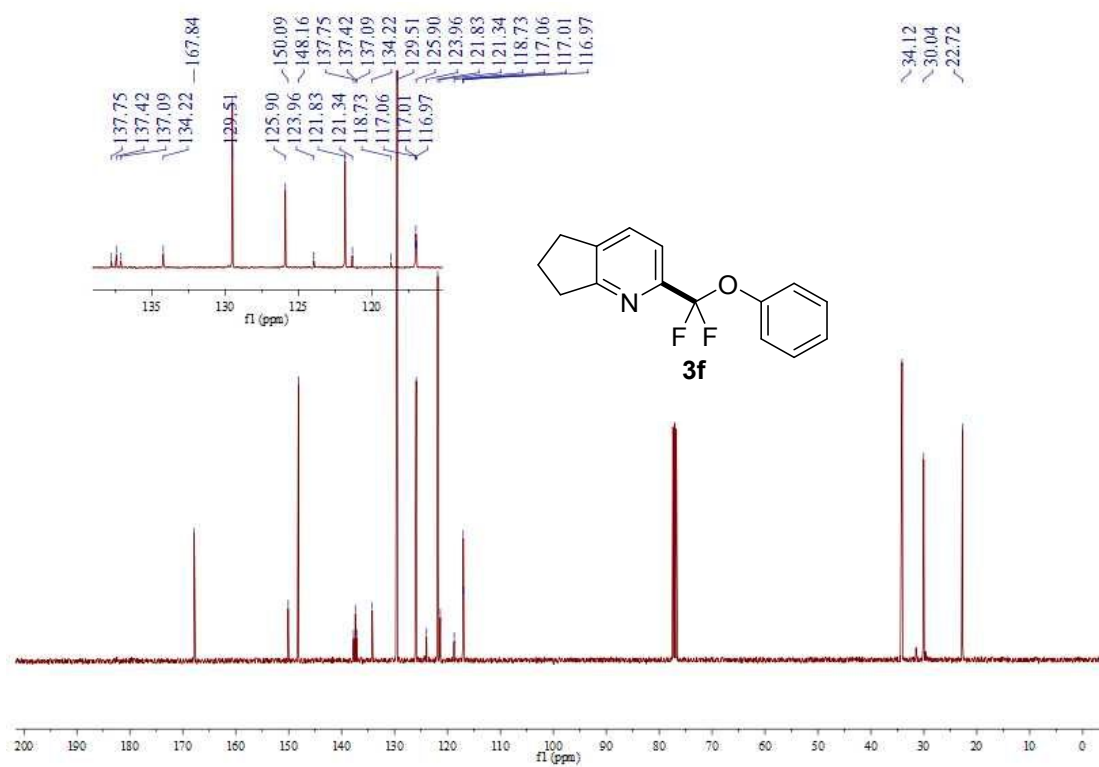

$^{19}\text{F}$  NMR (377 MHz,  $\text{CDCl}_3$ )

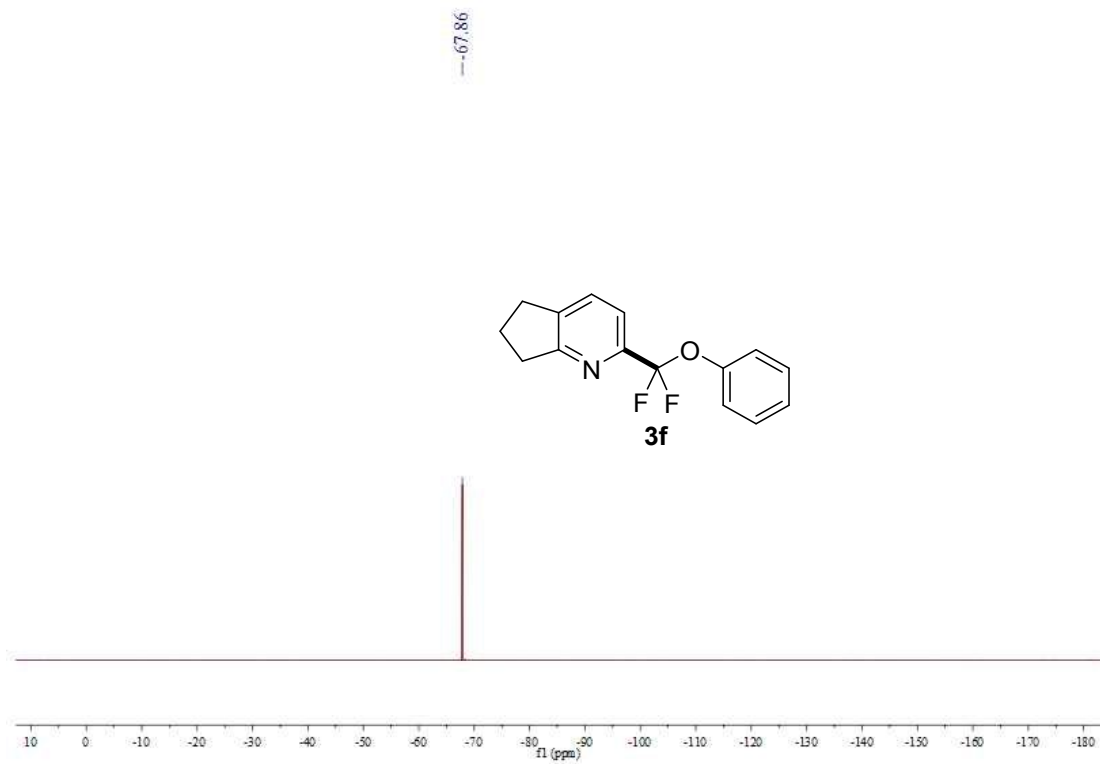



$^1\text{H}$  NMR (400 MHz,  $\text{CDCl}_3$ )

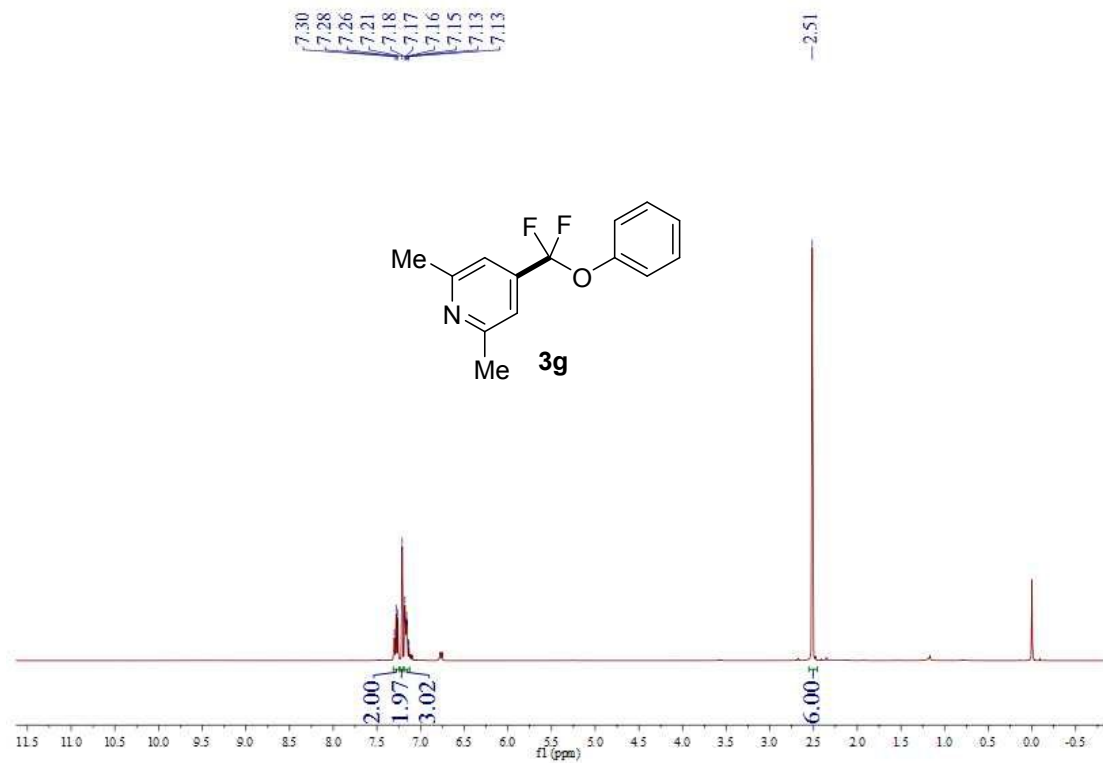

$^{13}\text{C}$  NMR (101 MHz,  $\text{CDCl}_3$ )

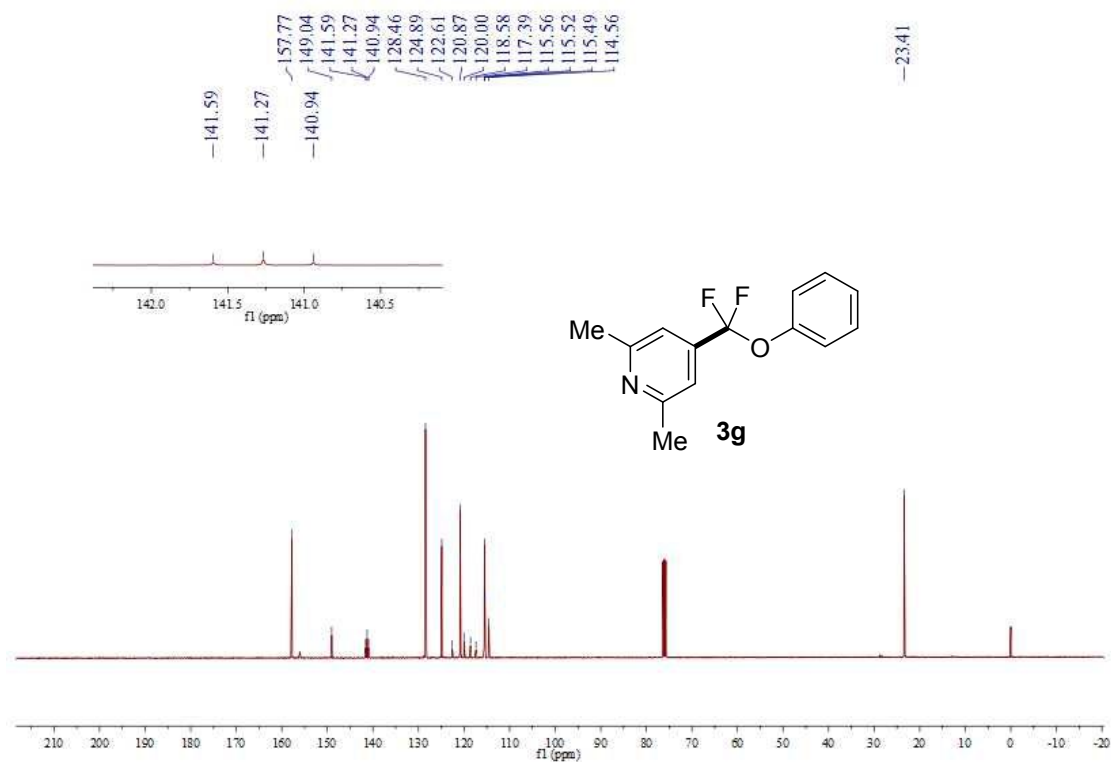

$^{19}\text{F}$  NMR (377 MHz,  $\text{CDCl}_3$ )

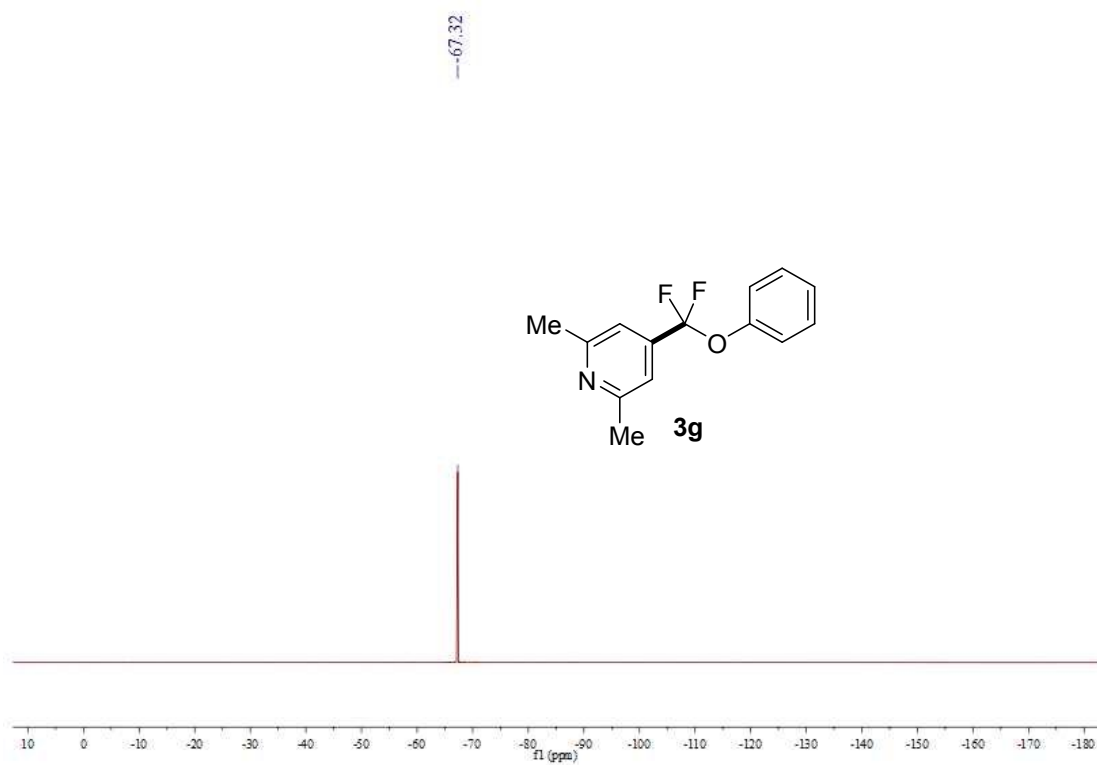

$^1\text{H}$  NMR (400 MHz,  $\text{CDCl}_3$ )

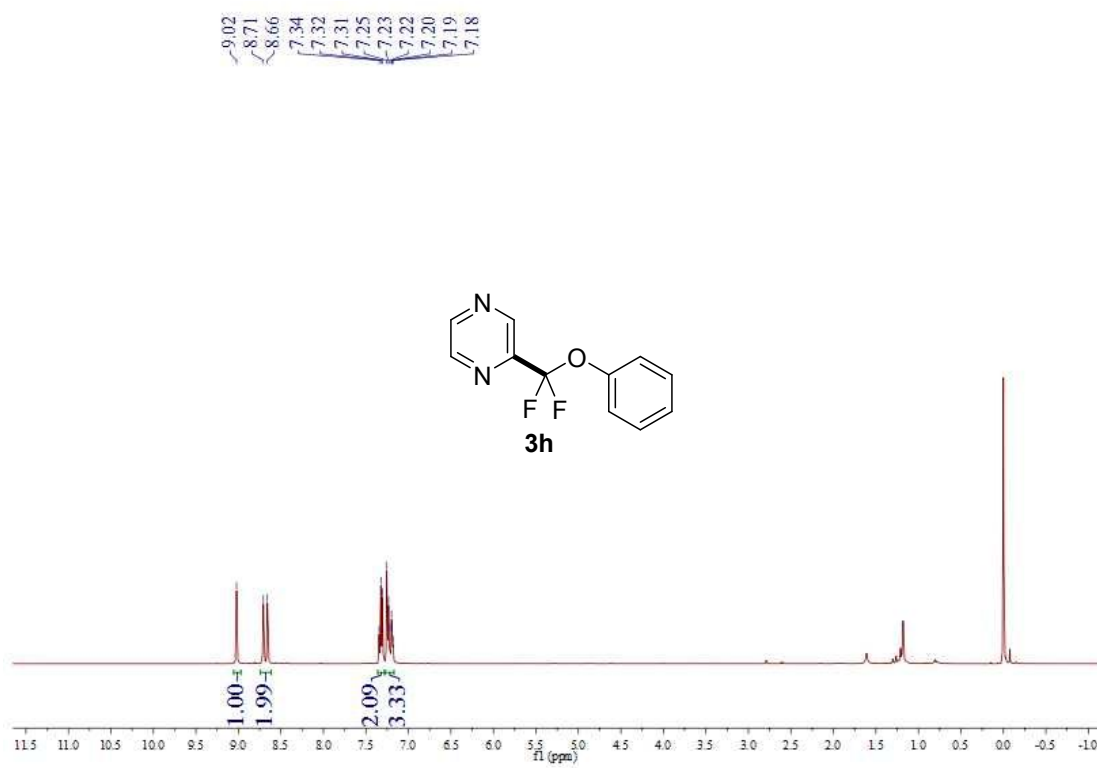

$^{13}\text{C}$  NMR (101 MHz,  $\text{CDCl}_3$ )

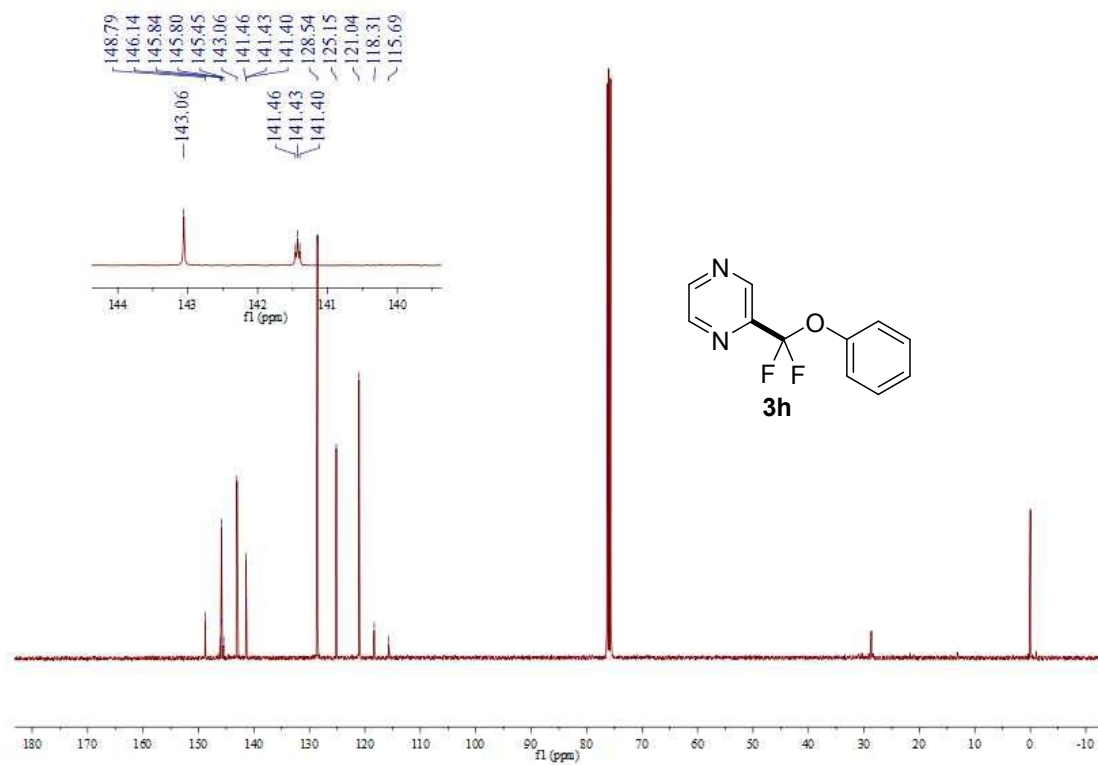

$^{19}\text{F}$  NMR (377 MHz,  $\text{CDCl}_3$ )

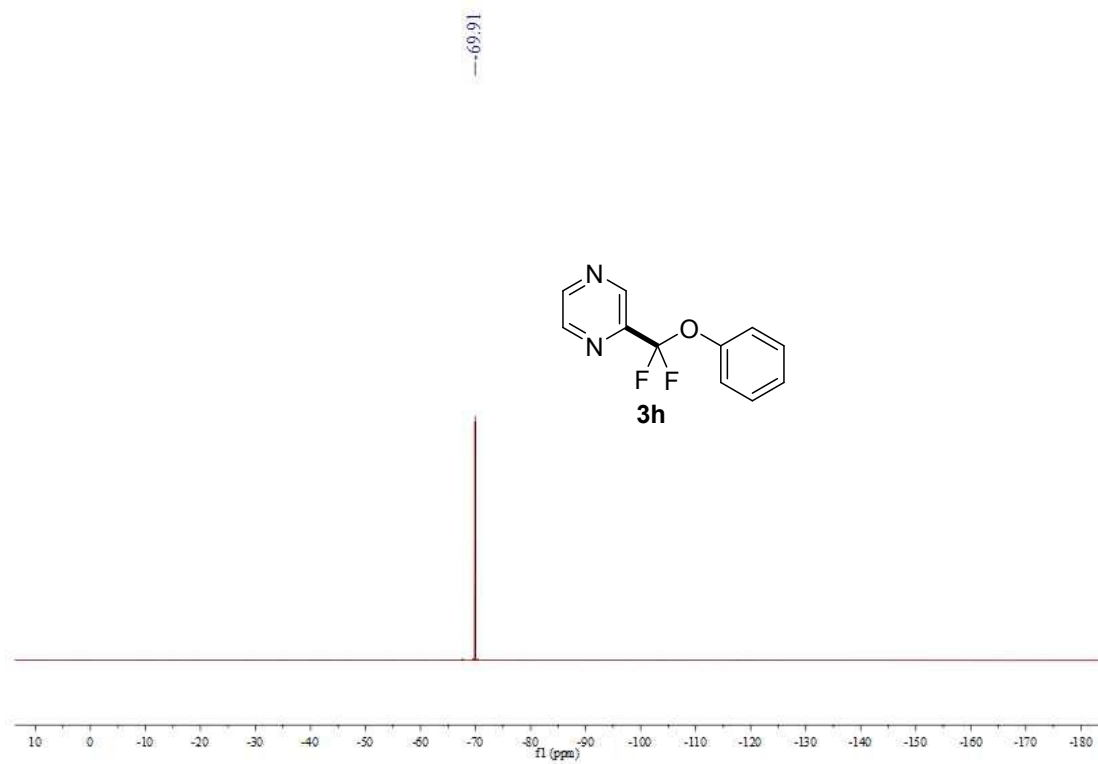

$^1\text{H}$  NMR (400 MHz,  $\text{CDCl}_3$ )

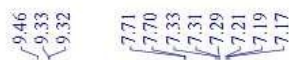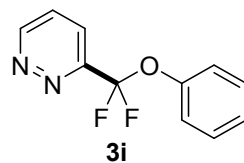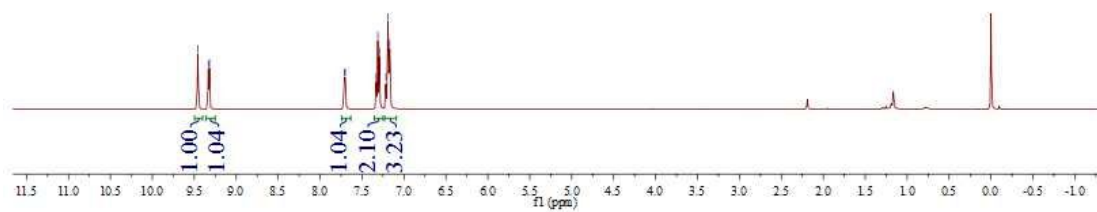

$^{13}\text{C}$  NMR (101 MHz,  $\text{CDCl}_3$ )

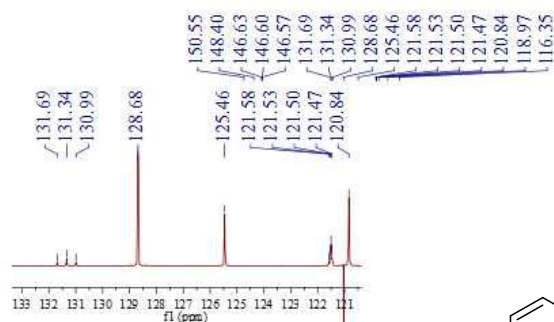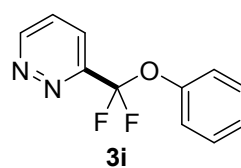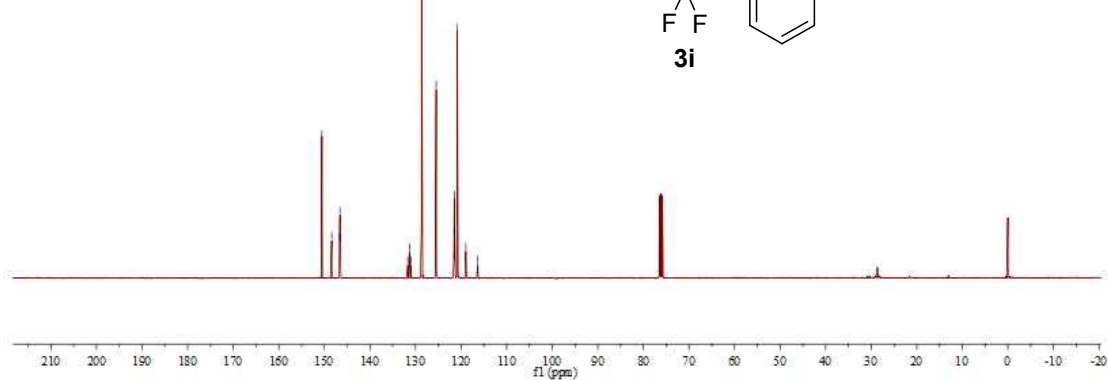

$^{19}\text{F}$  NMR (377 MHz,  $\text{CDCl}_3$ )

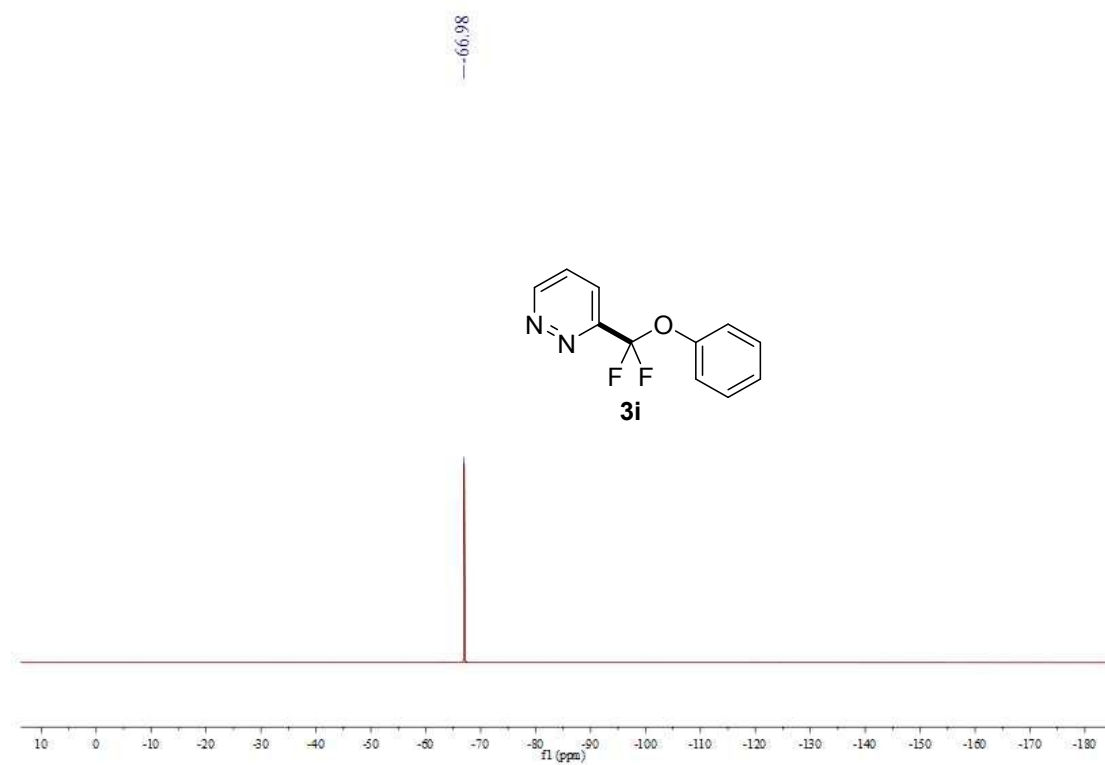

$^1\text{H}$  NMR (400 MHz,  $\text{CDCl}_3$ )

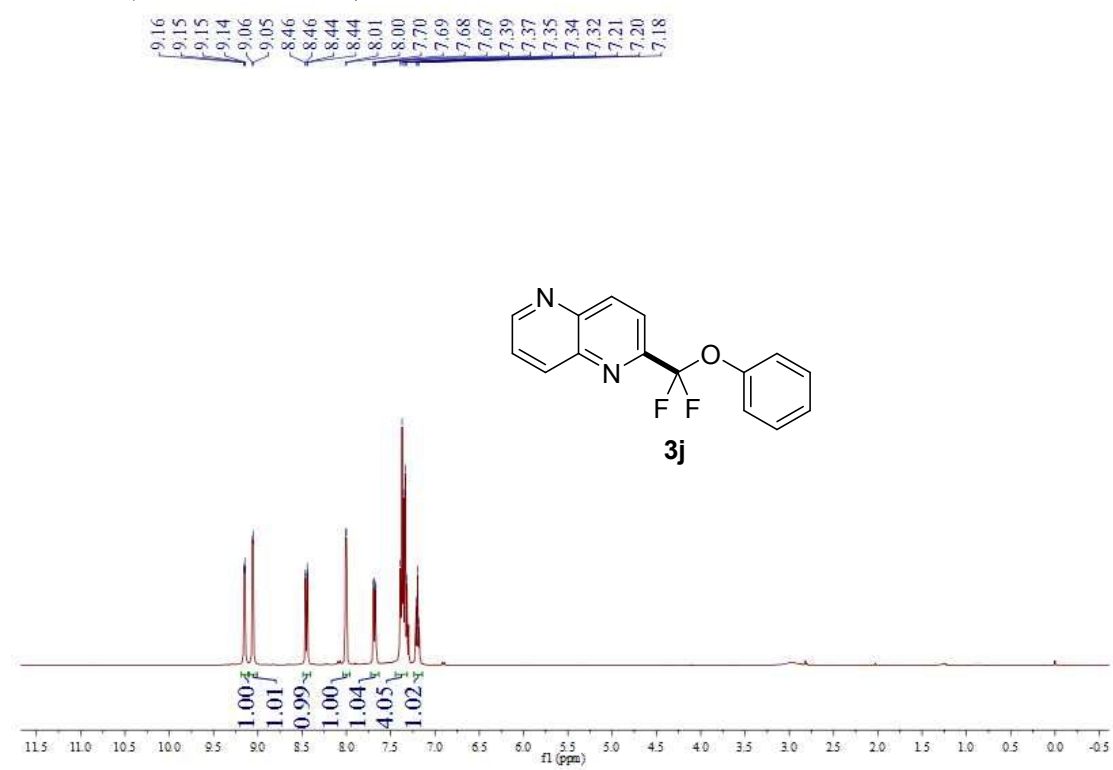

$^{13}\text{C}$  NMR (101 MHz,  $\text{CDCl}_3$ )

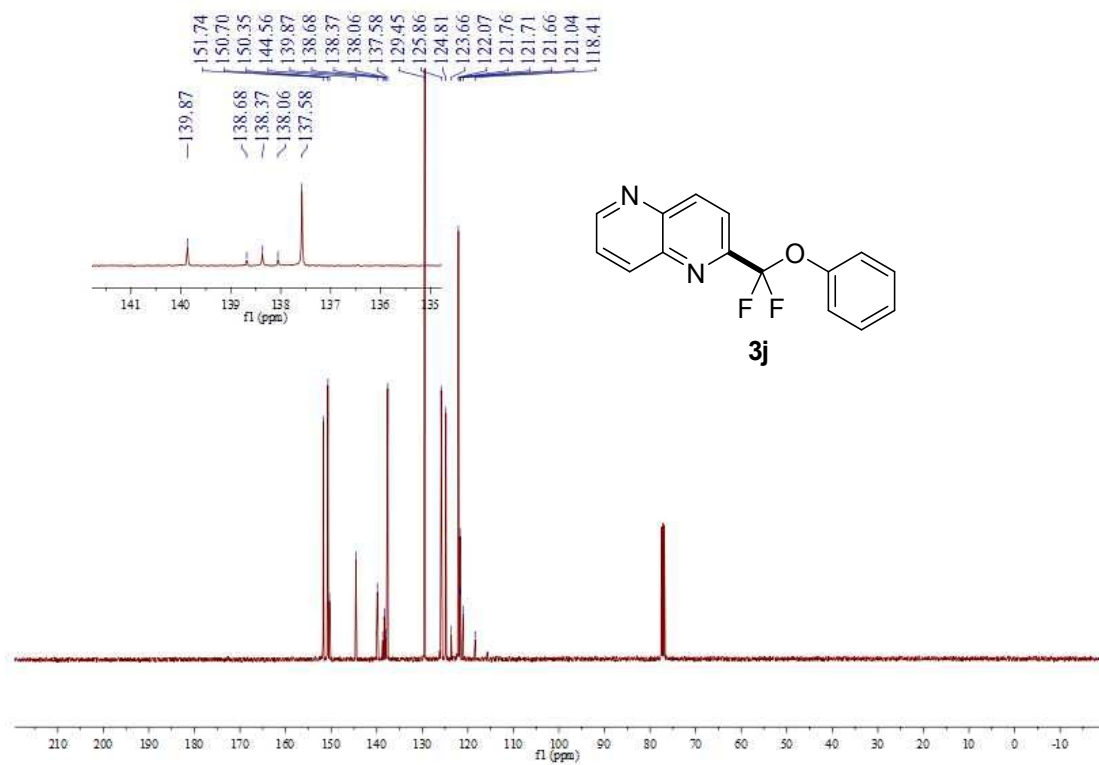

$^{19}\text{F}$  NMR (377 MHz,  $\text{CDCl}_3$ )

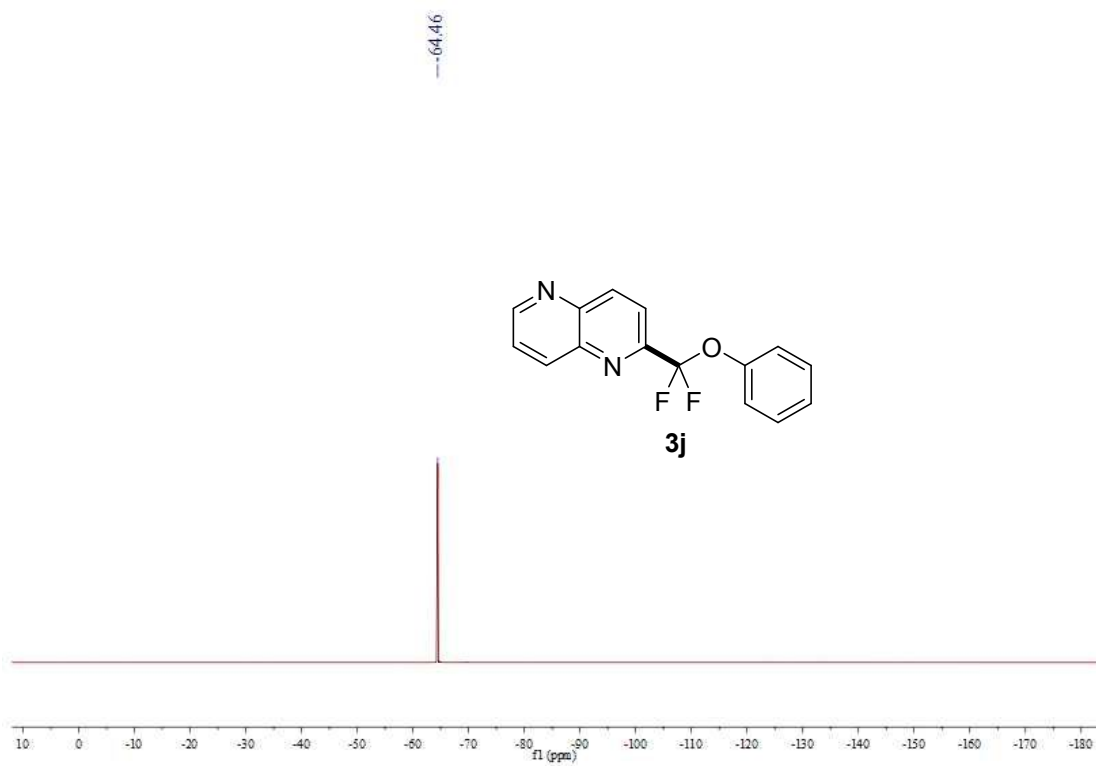

$^1\text{H}$  NMR (400 MHz,  $\text{CDCl}_3$ )

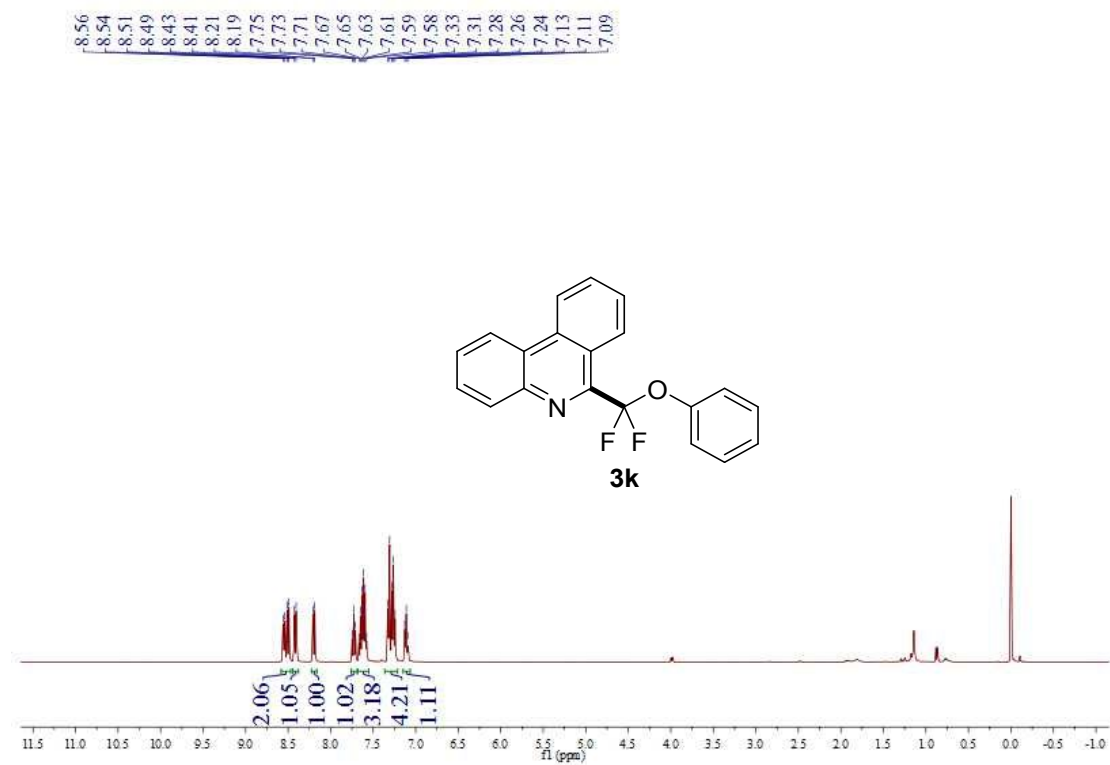

$^{13}\text{C}$  NMR (101 MHz,  $\text{CDCl}_3$ )

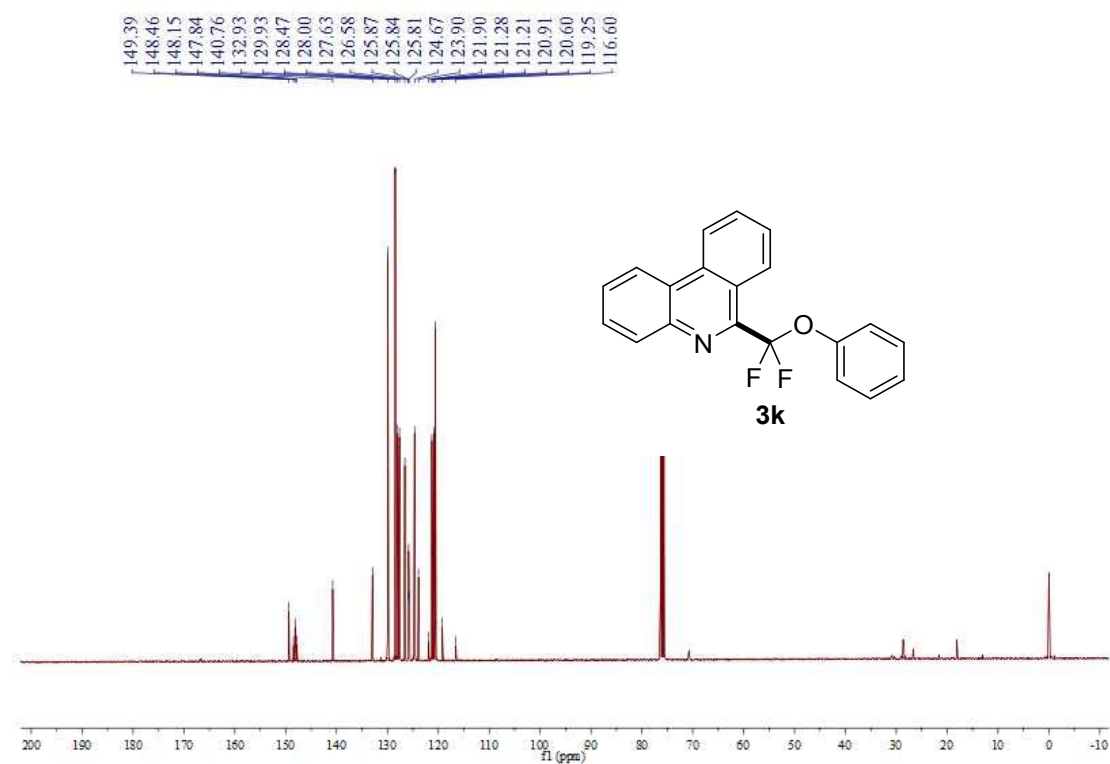

$^{19}\text{F}$  NMR (377 MHz,  $\text{CDCl}_3$ )

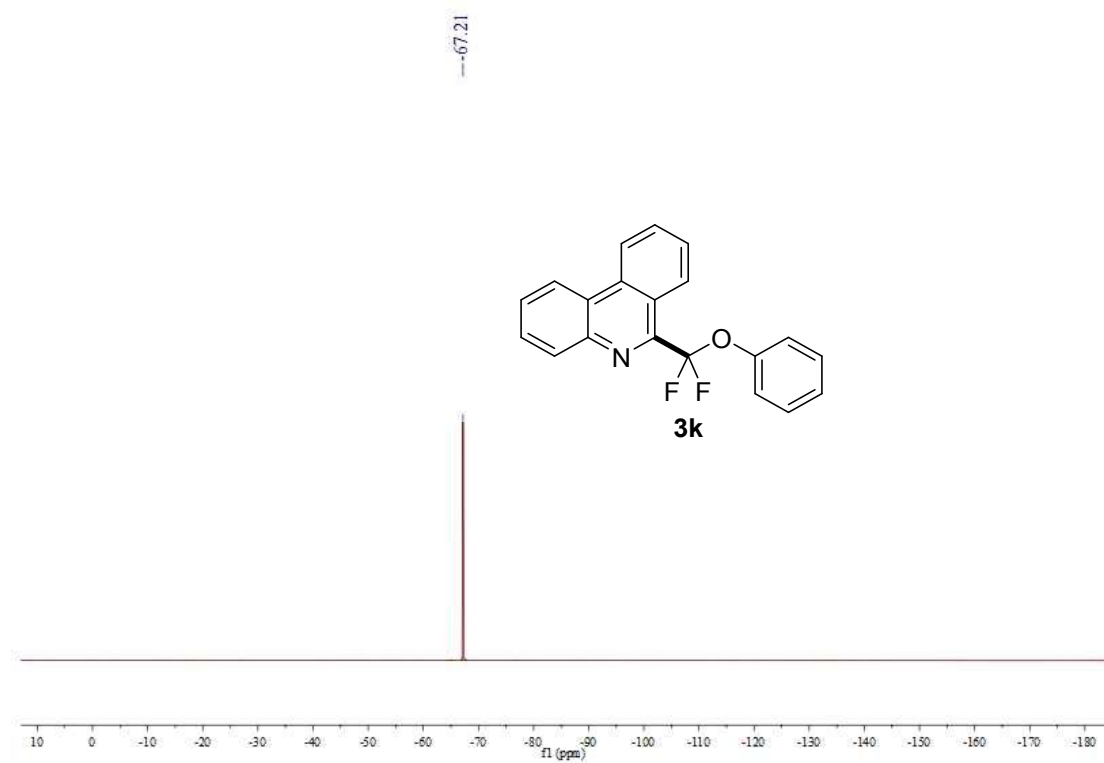

$^1\text{H}$  NMR (600 MHz,  $\text{CDCl}_3$ )

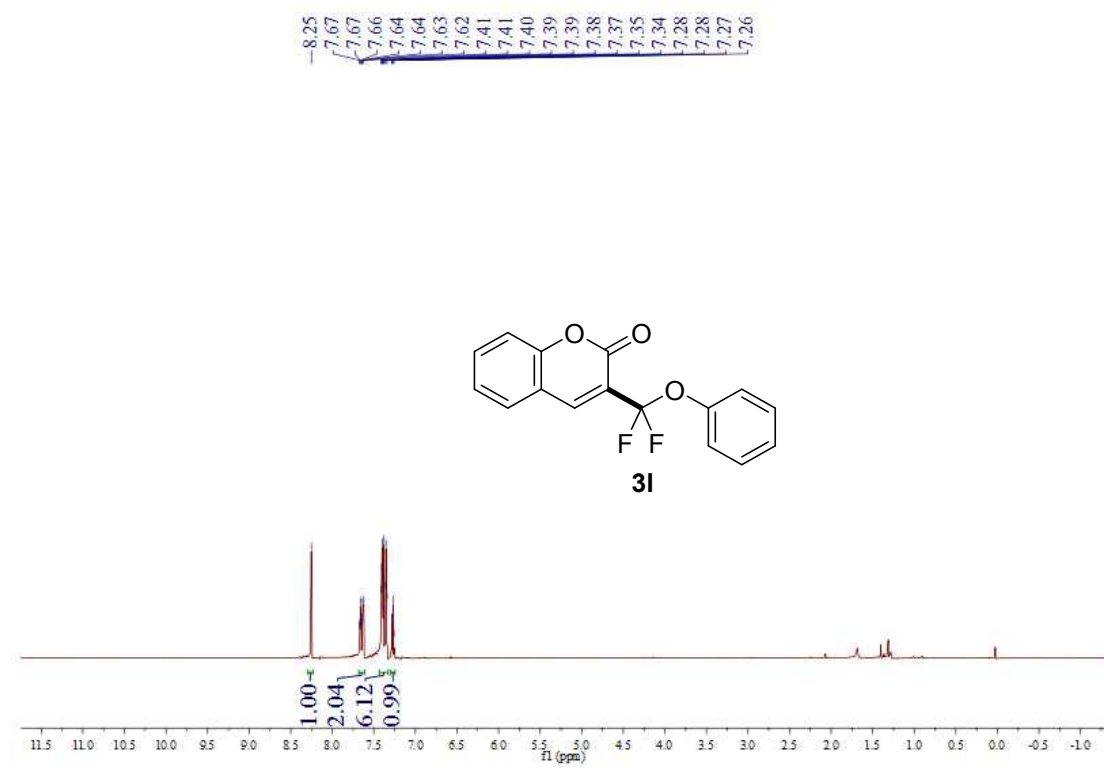



$^{13}\text{C}$  NMR (101 MHz,  $\text{CDCl}_3$ )

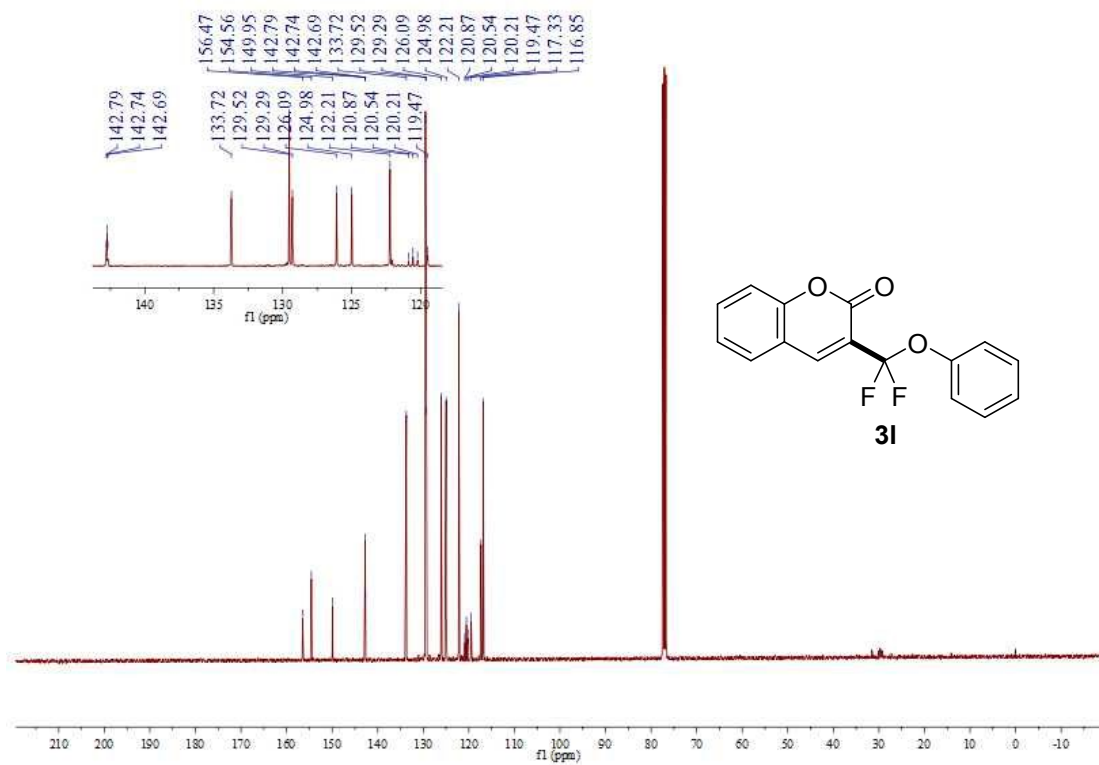

$^{19}\text{F}$  NMR (565 MHz,  $\text{CDCl}_3$ )

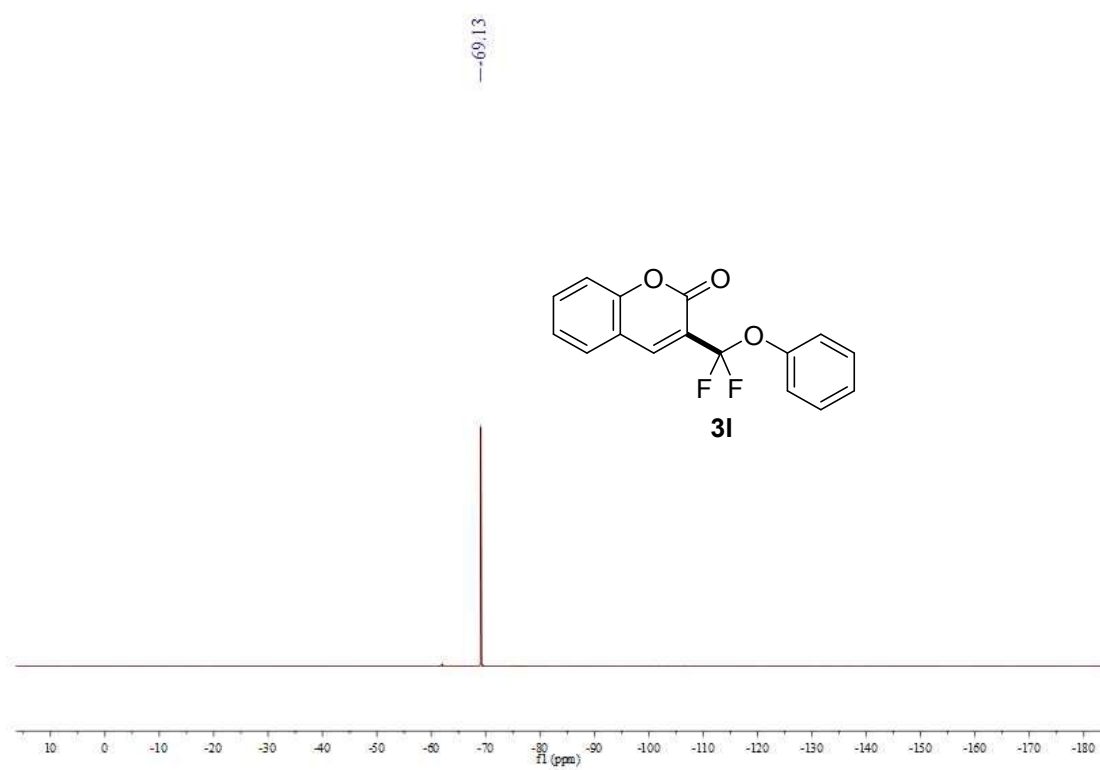

$^1\text{H}$  NMR (400 MHz,  $\text{DMSO}-d_6$ )

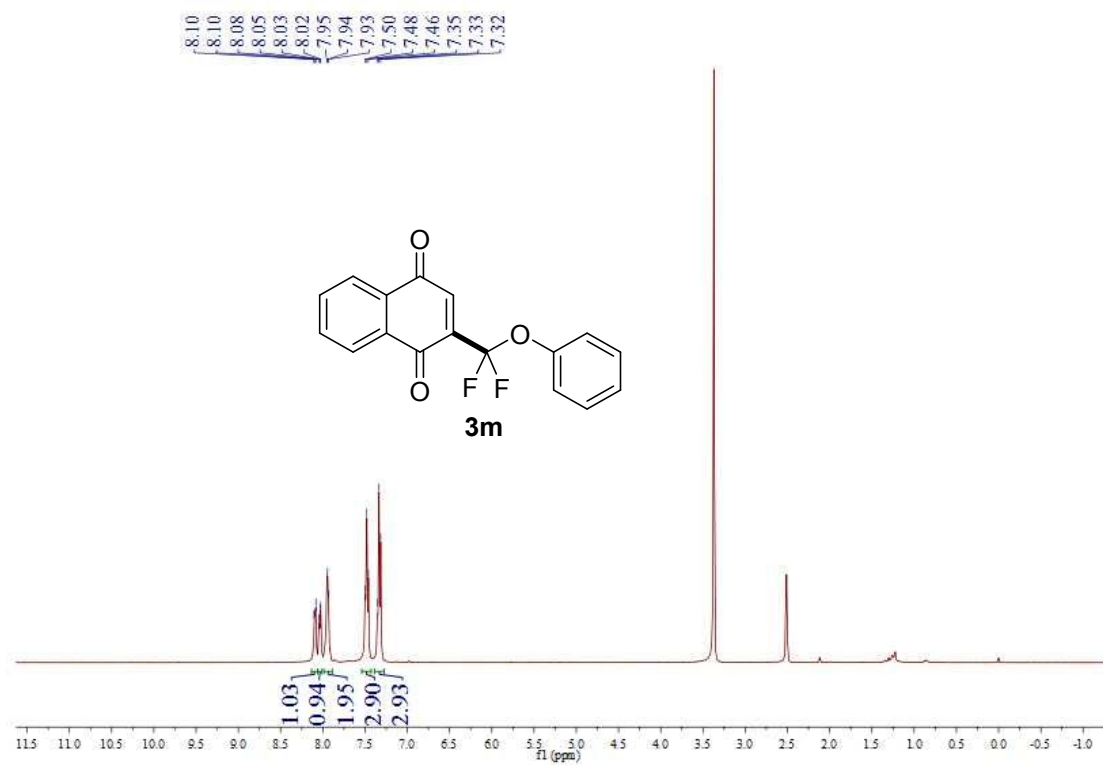

$^{13}\text{C}$  NMR (101 MHz,  $\text{CDCl}_3$ )

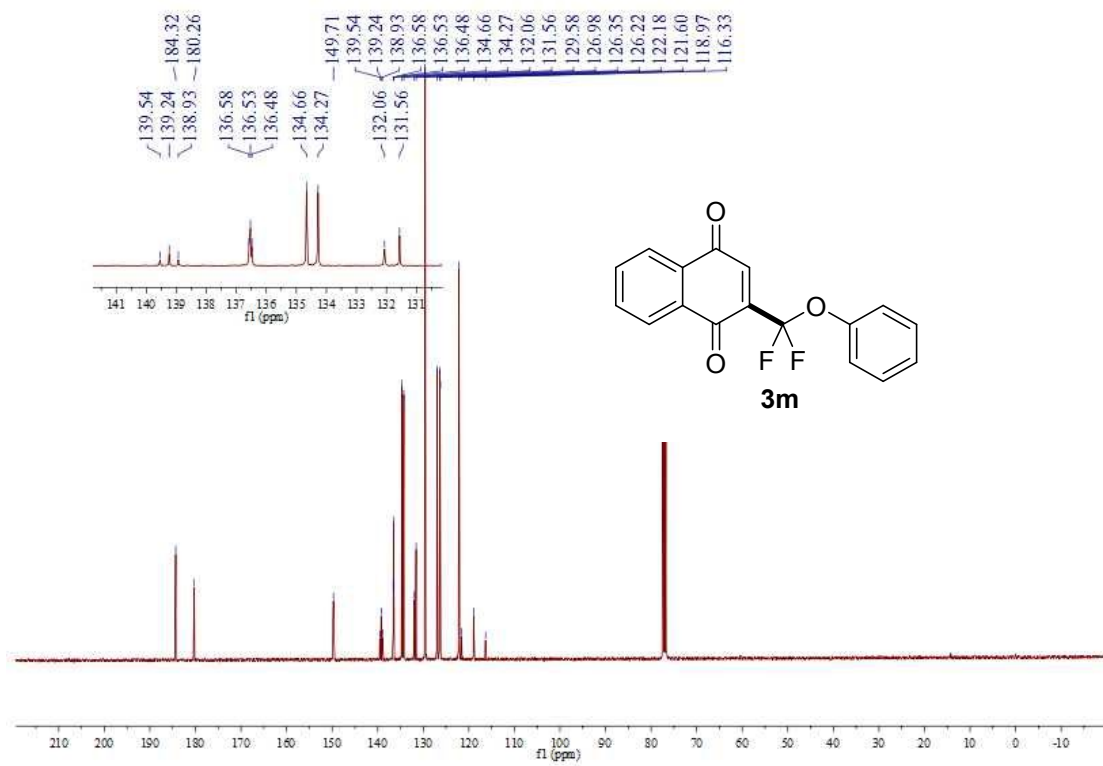

$^{19}\text{F}$  NMR (377 MHz,  $\text{CDCl}_3$ )

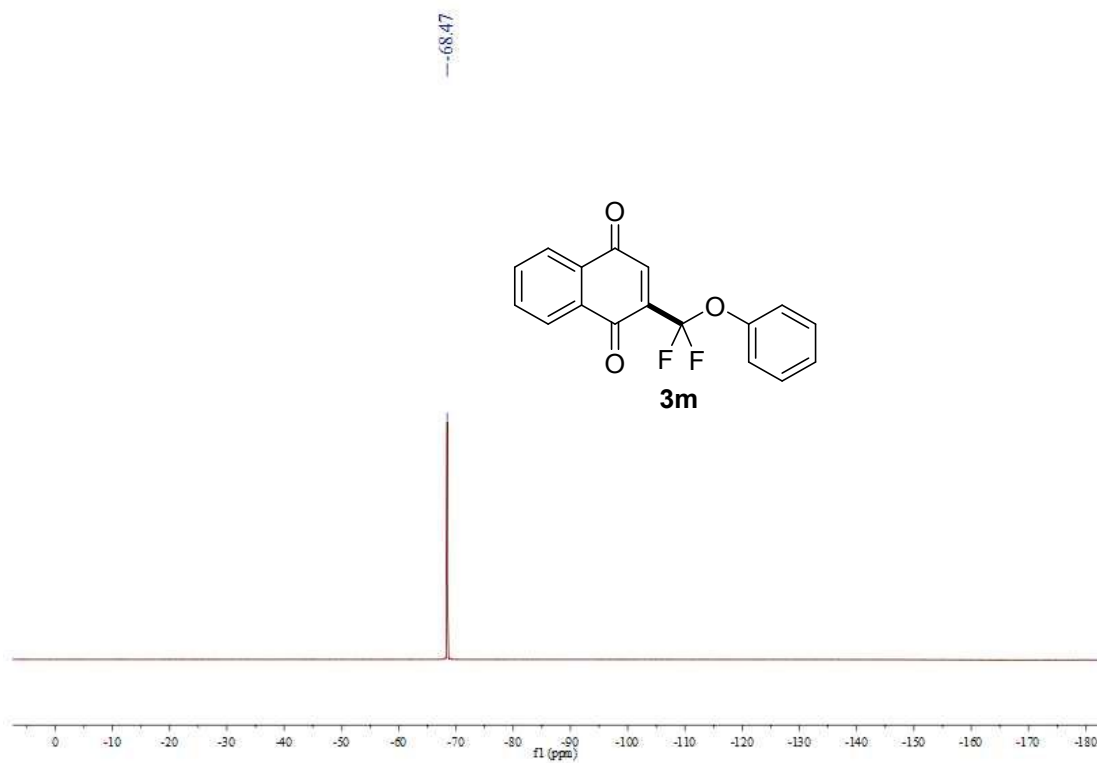

$^1\text{H}$  NMR (400 MHz,  $\text{CDCl}_3$ )

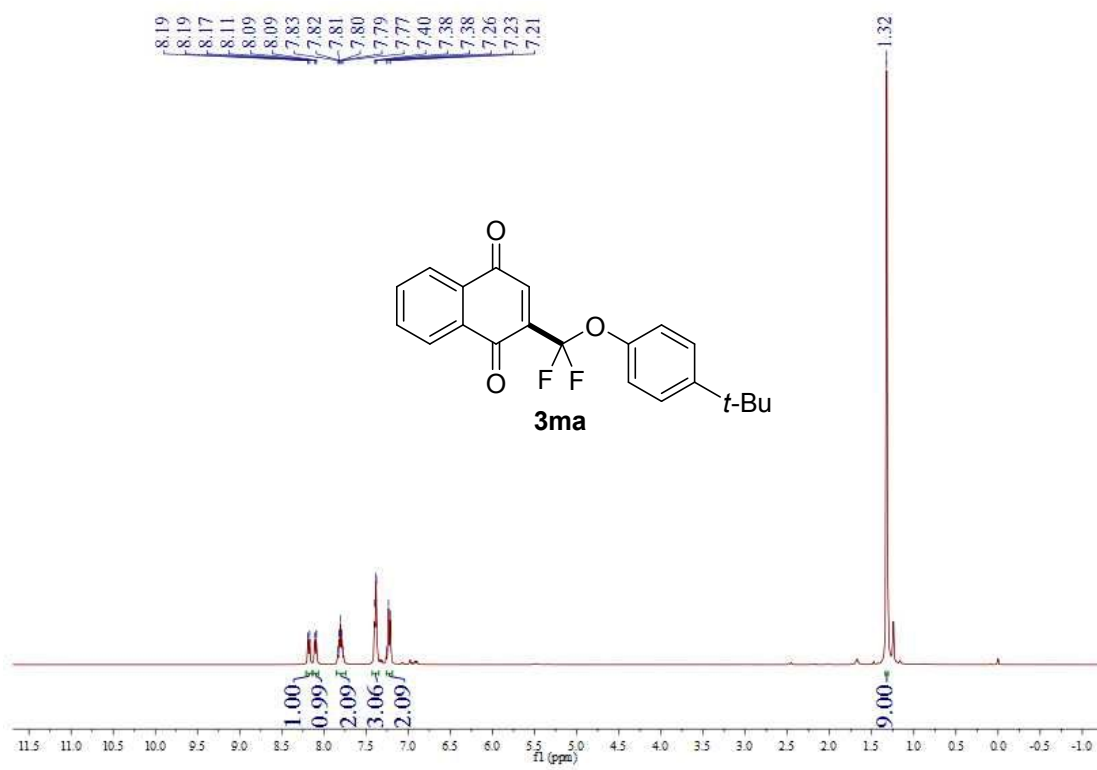

$^{13}\text{C}$  NMR (101 MHz,  $\text{CDCl}_3$ )

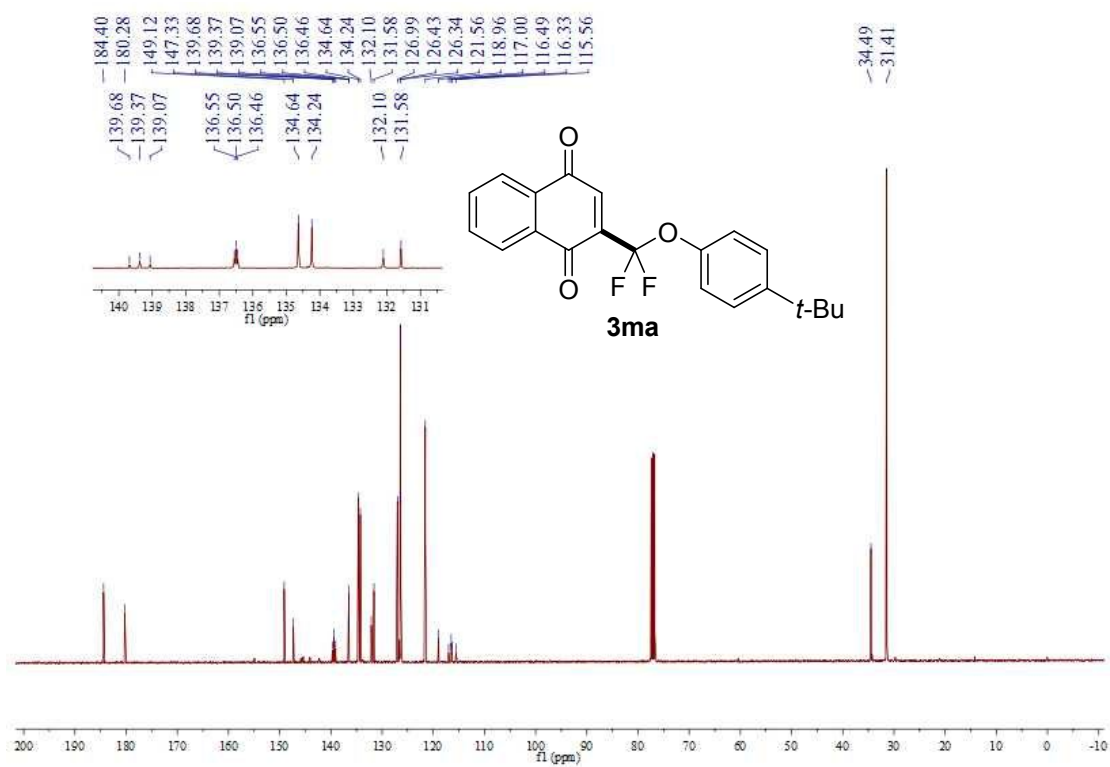

$^{19}\text{F}$  NMR (377 MHz,  $\text{CDCl}_3$ )

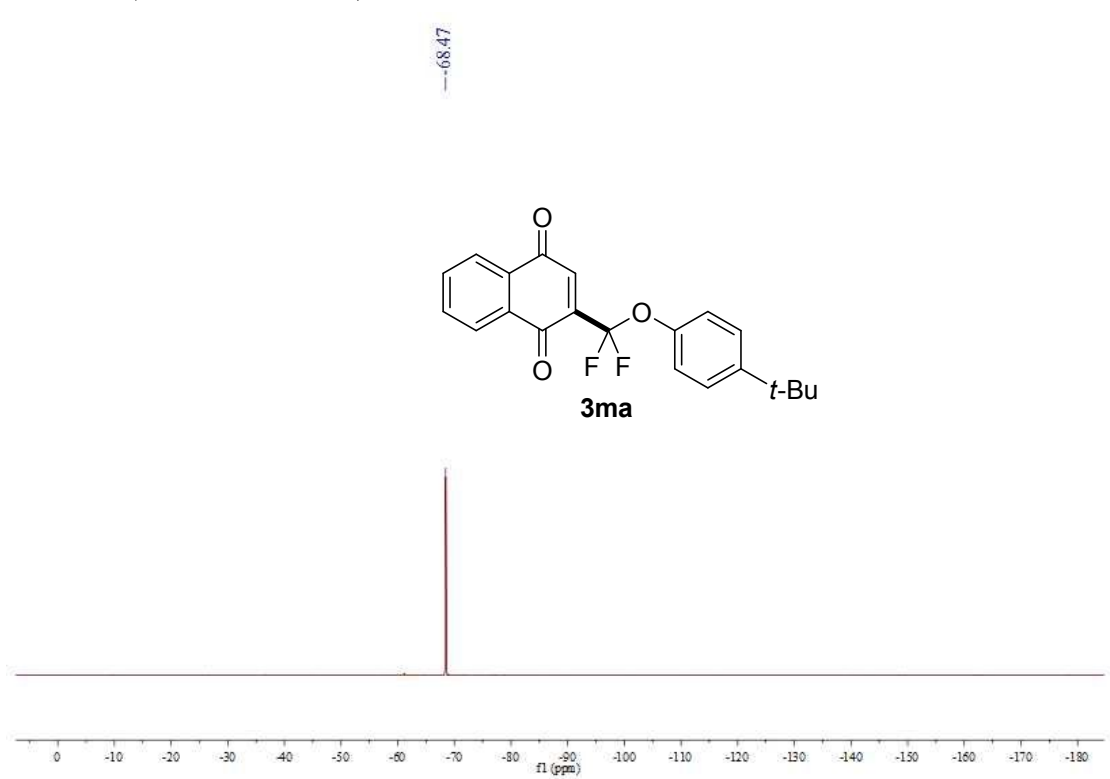

$^1\text{H}$  NMR (400 MHz,  $\text{CD}_3\text{CN}$ )

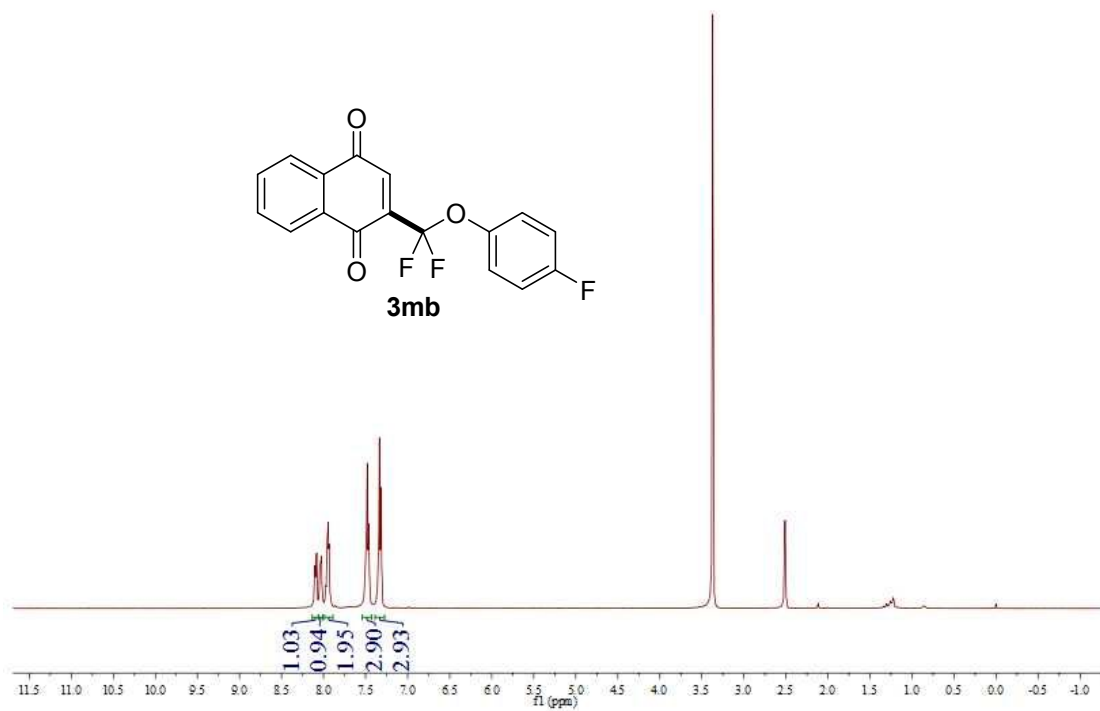

$^{13}\text{C}$  NMR (101 MHz,  $\text{CDCl}_3$ )

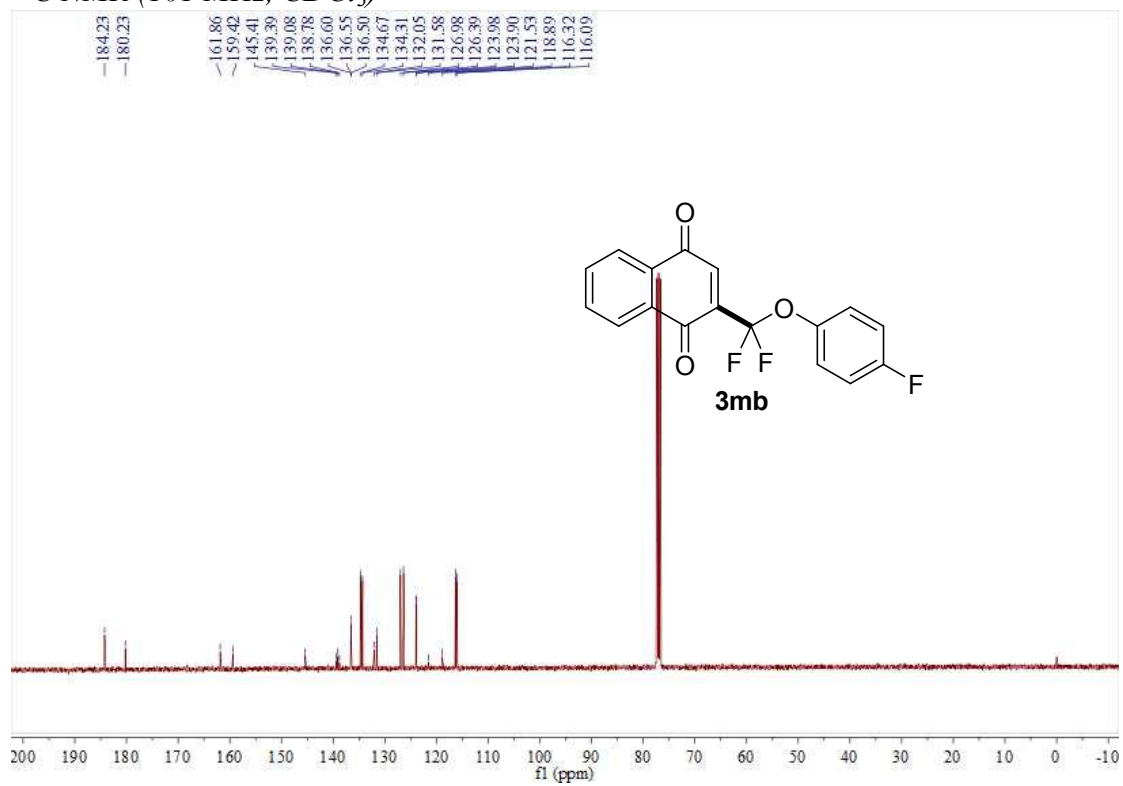

$^{19}\text{F}$  NMR (377 MHz,  $\text{CD}_3\text{CN}$ )

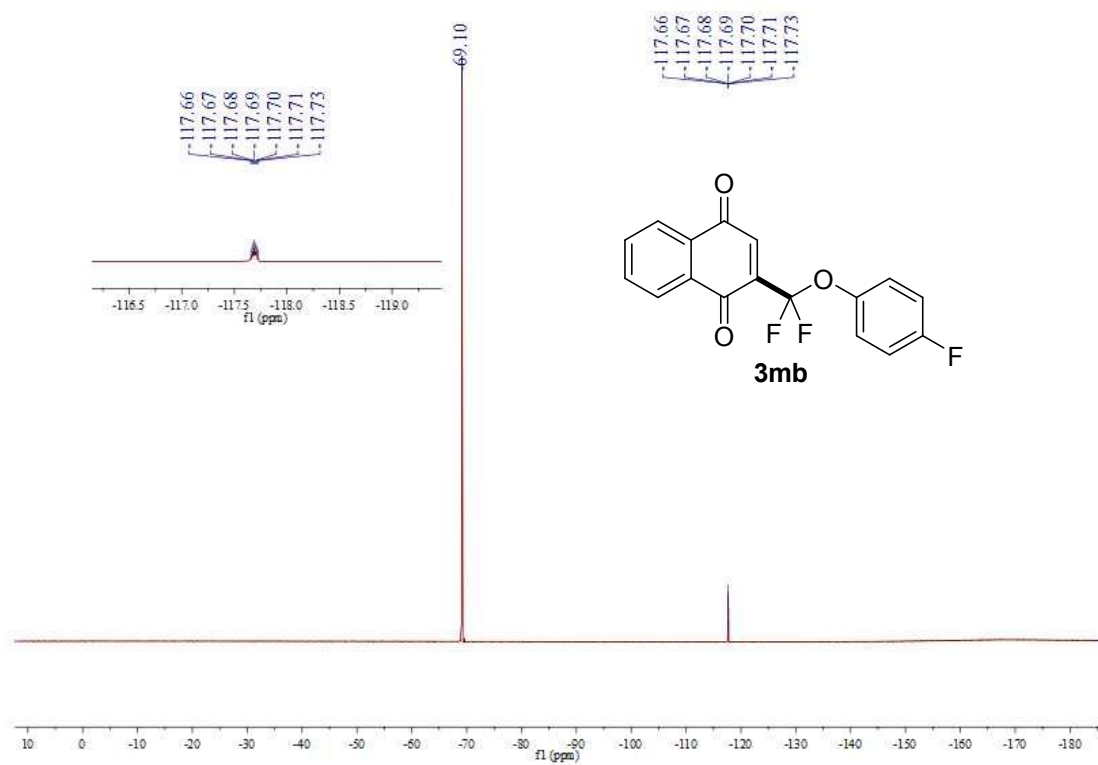

$^1\text{H}$  NMR (400 MHz,  $\text{CD}_3\text{CN}$ )

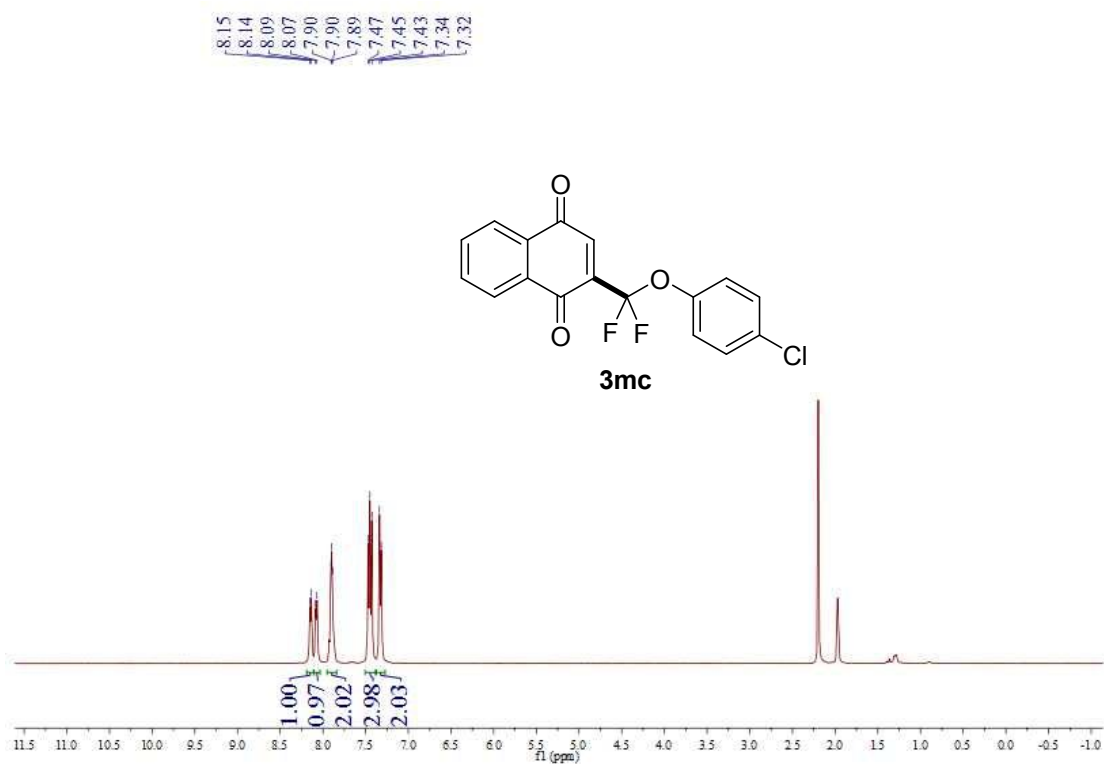

$^{13}\text{C}$  NMR (101 MHz,  $\text{CDCl}_3$ )

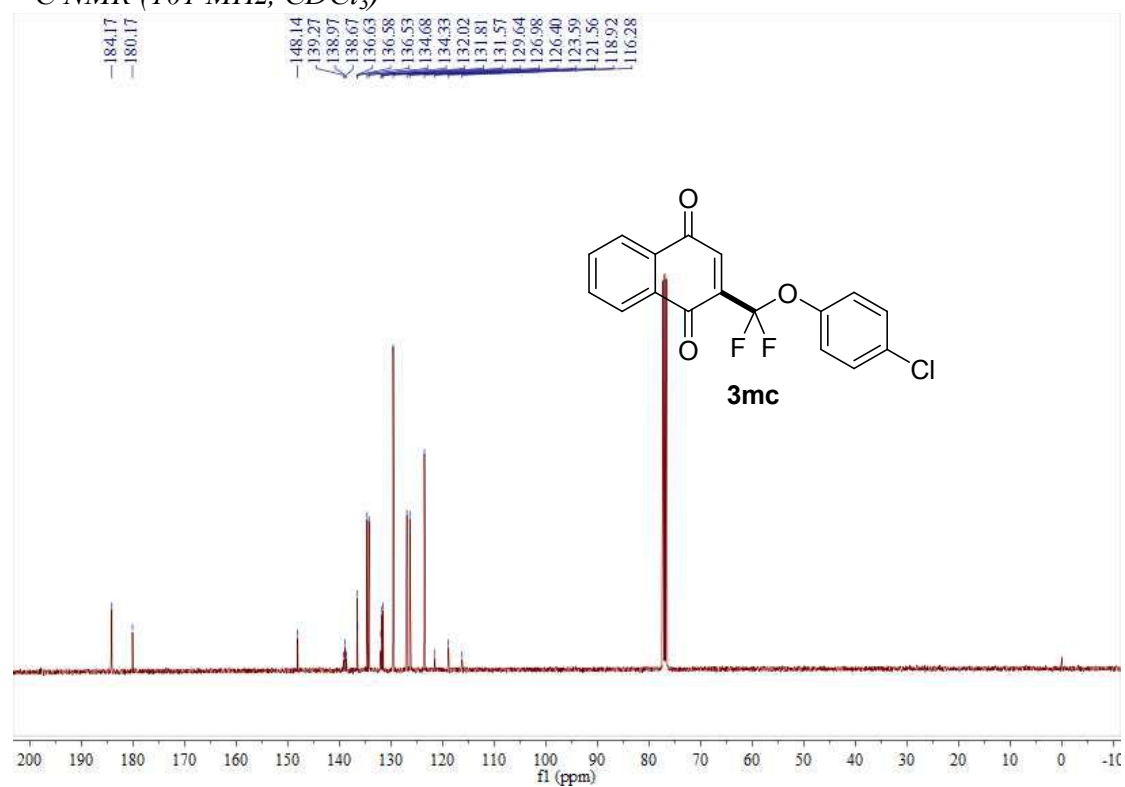

$^{19}\text{F}$  NMR (377 MHz,  $\text{CD}_3\text{CN}$ )

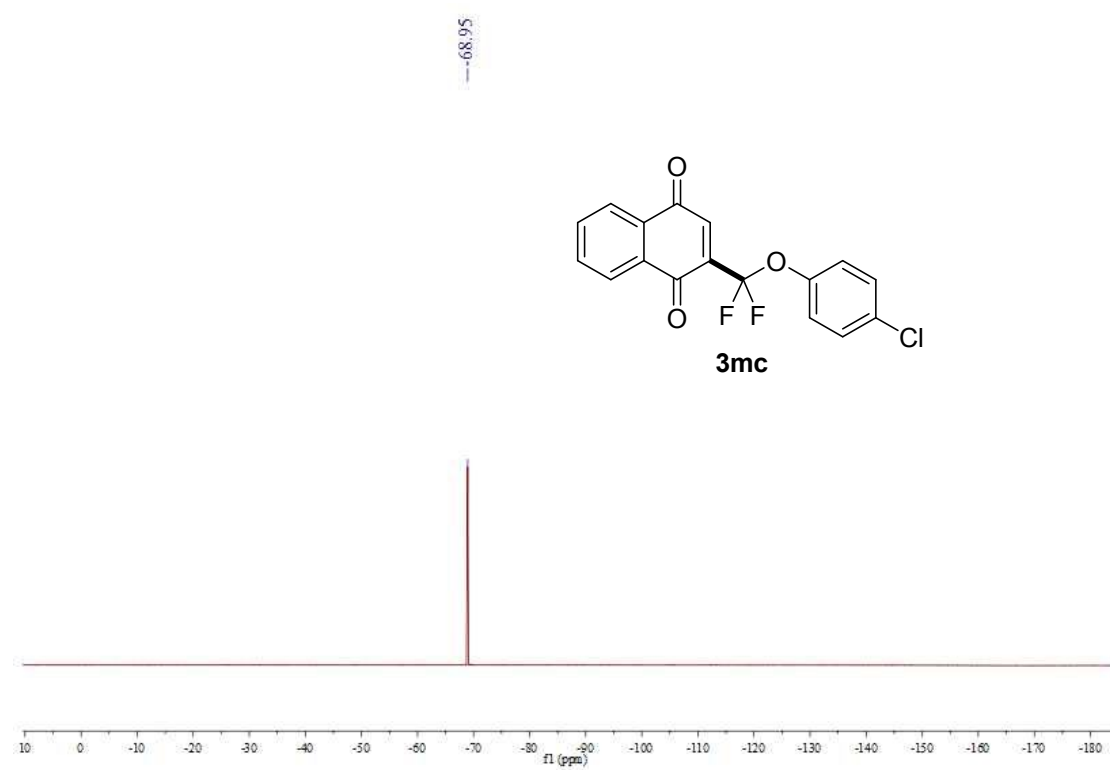

$^1\text{H}$  NMR (400 MHz,  $\text{CDCl}_3$ )

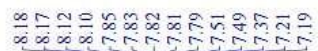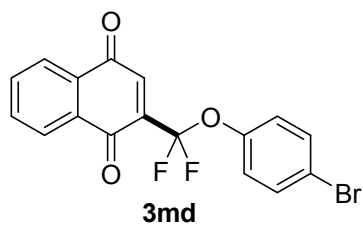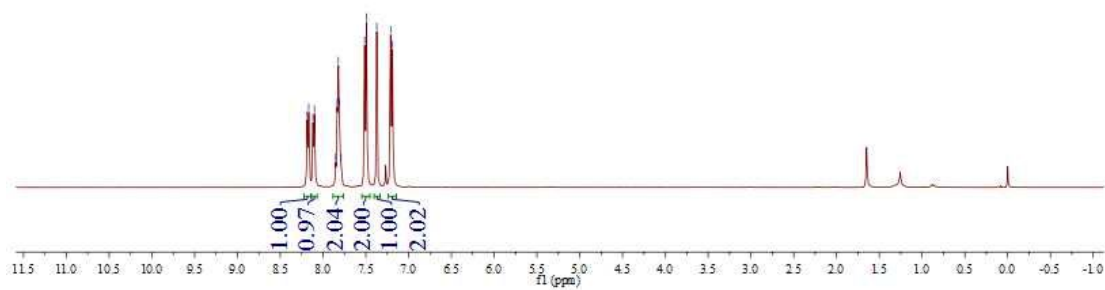

$^{13}\text{C}$  NMR (101 MHz,  $\text{CDCl}_3$ )

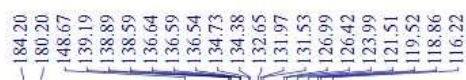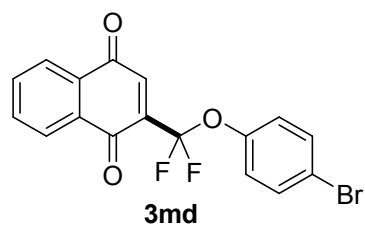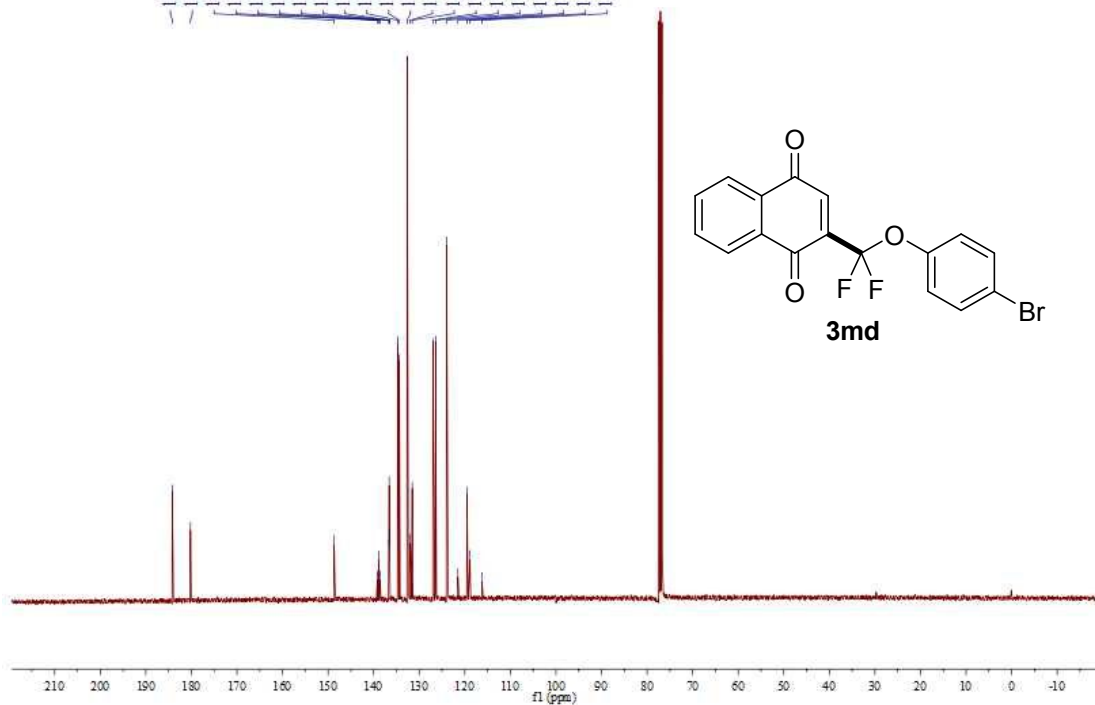



$^{19}\text{F}$  NMR (377 MHz,  $\text{CDCl}_3$ )

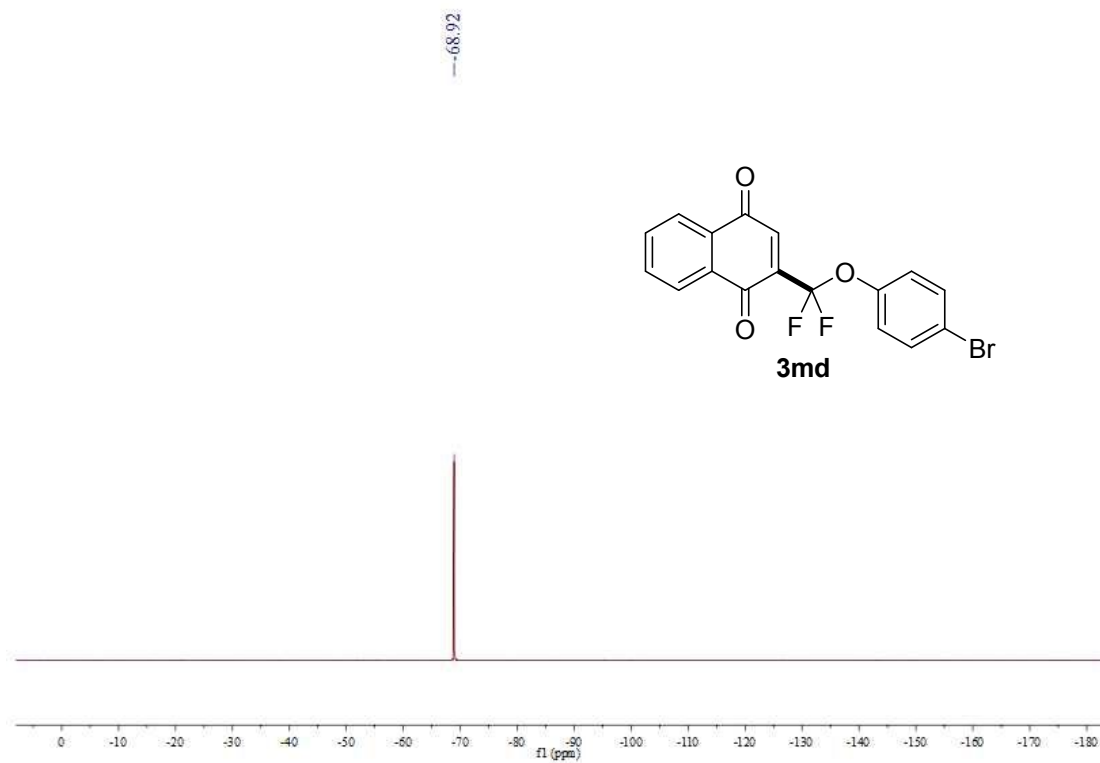

$^1\text{H}$  NMR (600 MHz,  $\text{CDCl}_3$ )

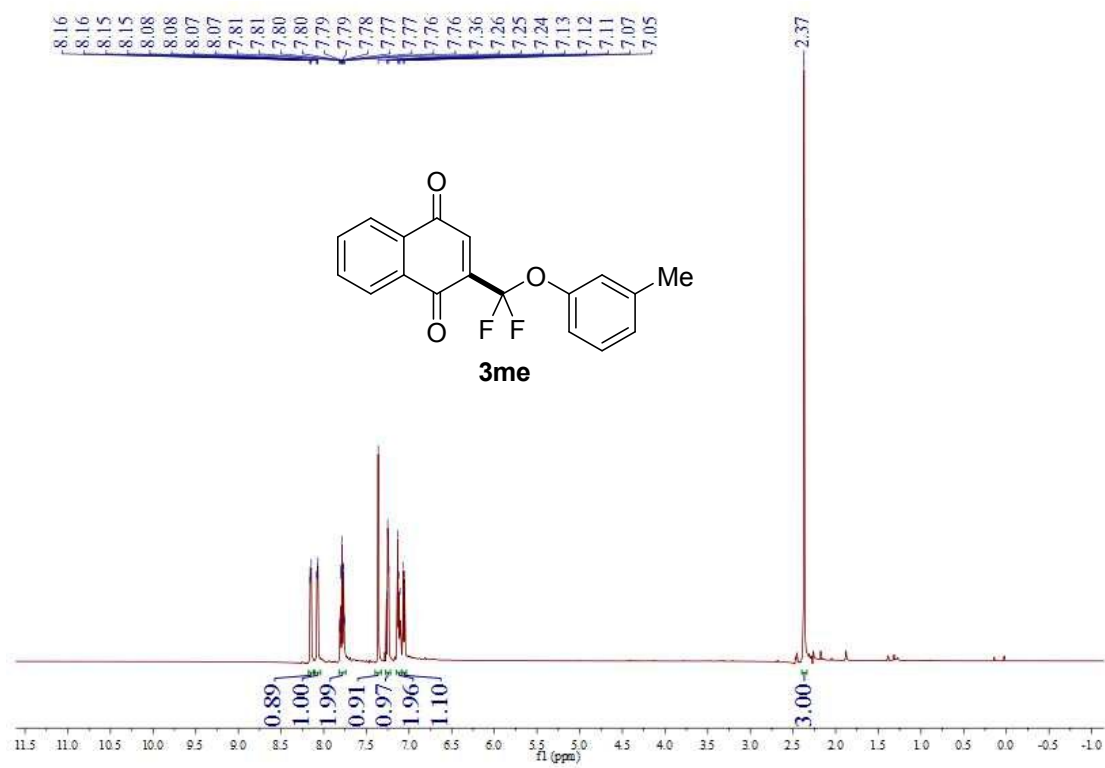

$^{13}\text{C}$  NMR (101 MHz,  $\text{CDCl}_3$ )

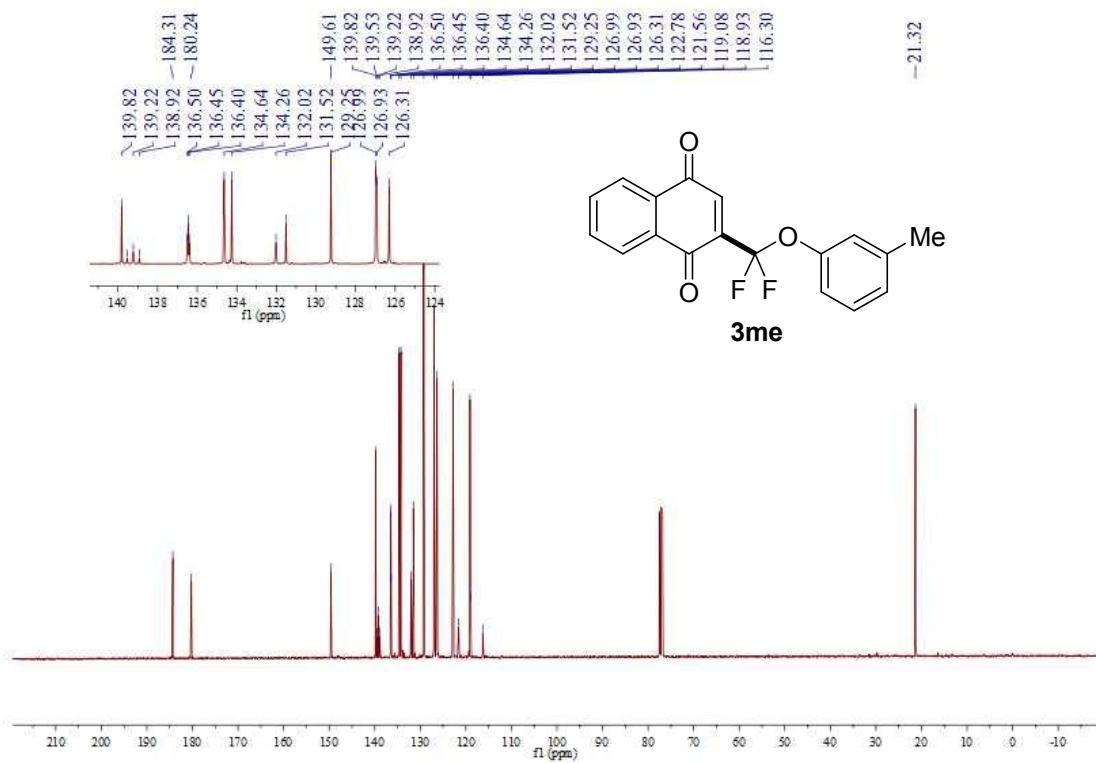

$^{19}\text{F}$  NMR (565 MHz,  $\text{CDCl}_3$ )

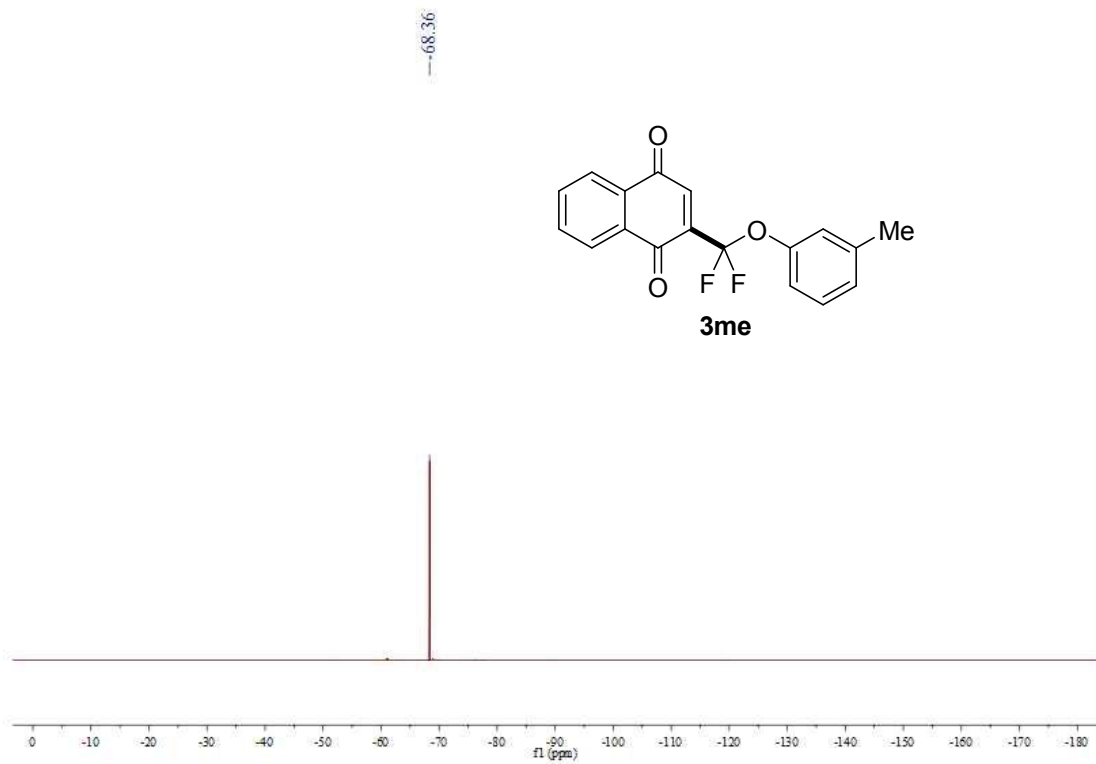

$^1\text{H}$  NMR (400 MHz,  $\text{CDCl}_3$ )

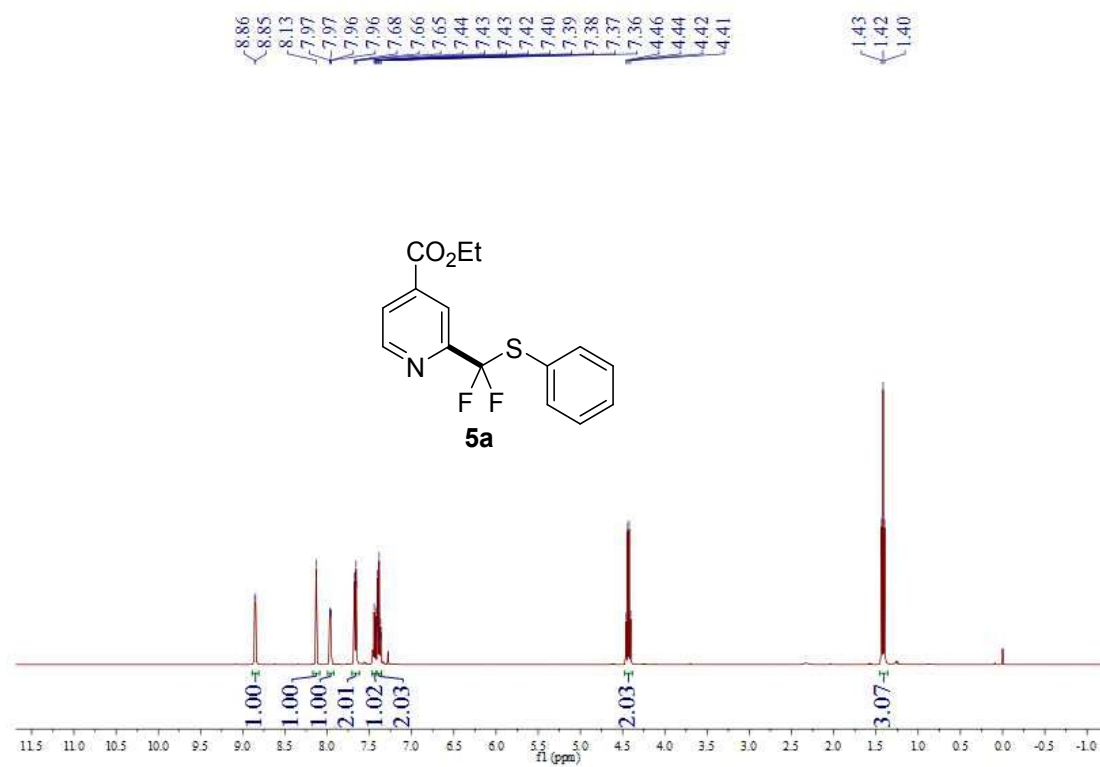

$^{13}\text{C}$  NMR (151 MHz,  $\text{CDCl}_3$ )

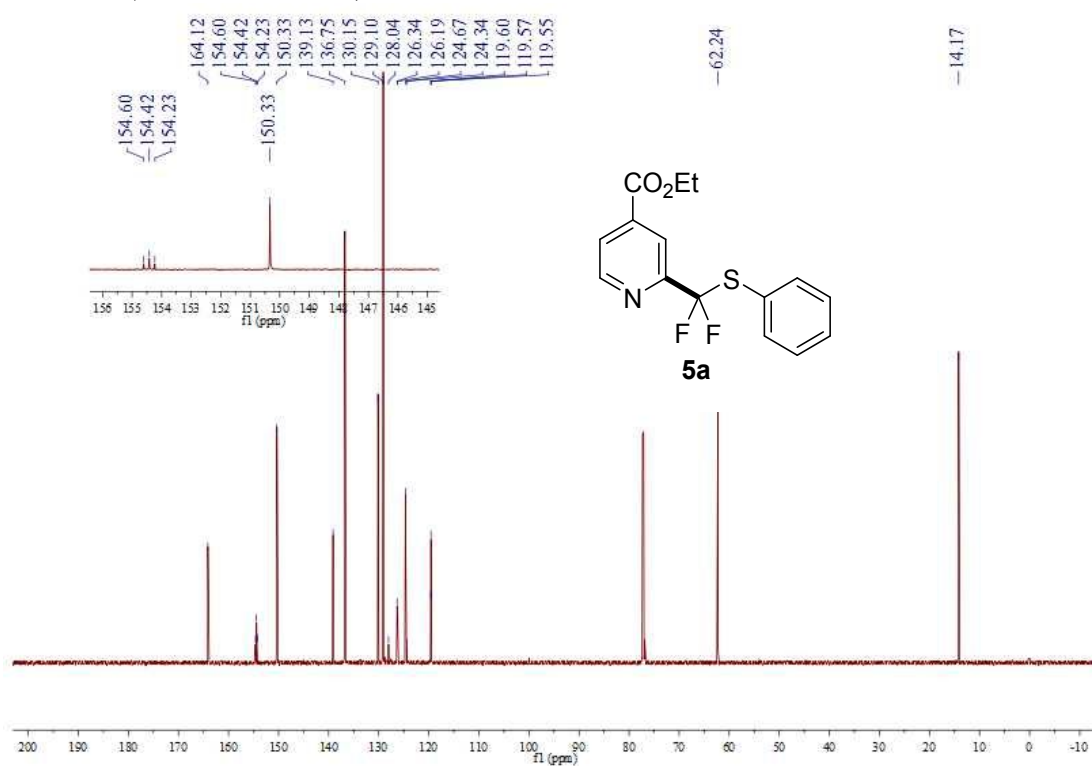

$^{19}\text{F}$  NMR (377 MHz,  $\text{CDCl}_3$ )

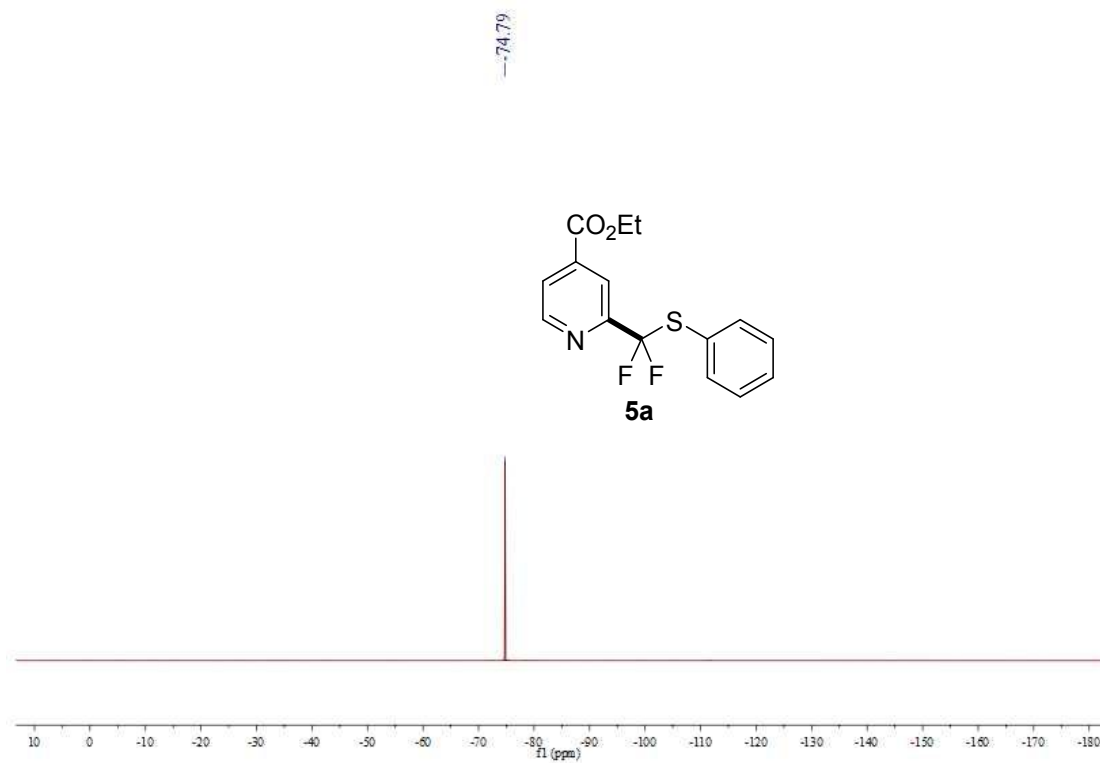

$^1\text{H}$  NMR (400 MHz,  $\text{CDCl}_3$ )

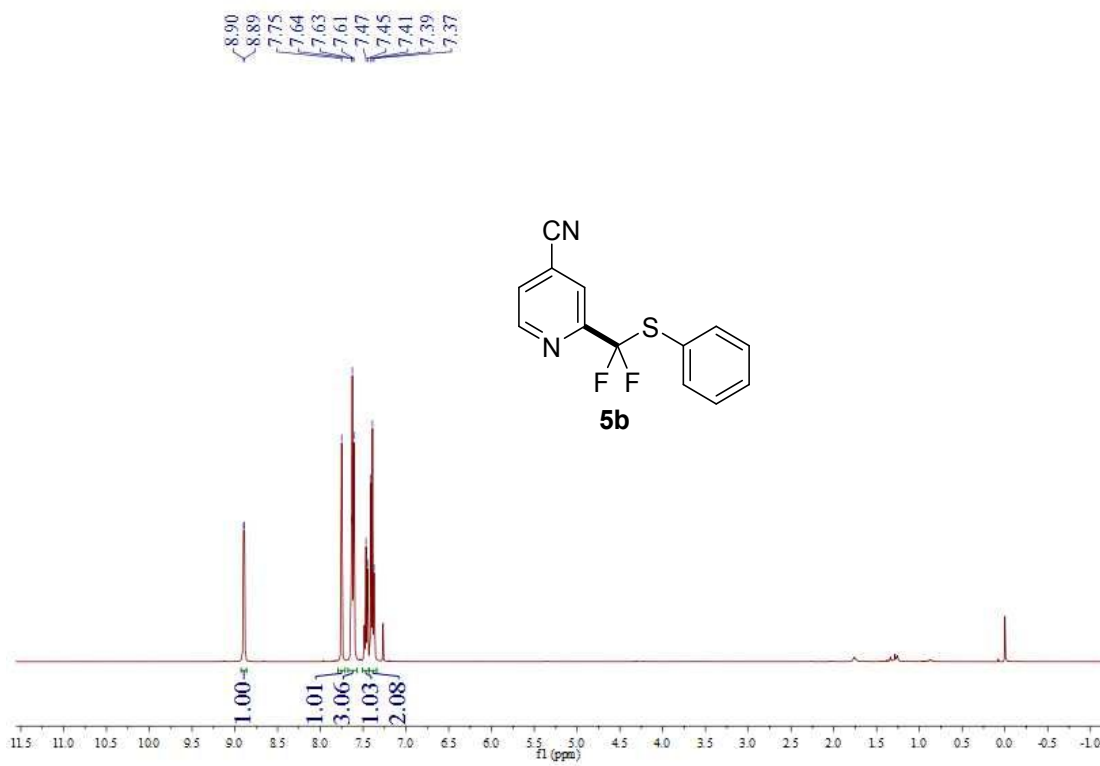

$^{13}\text{C}$  NMR (151 MHz,  $\text{CDCl}_3$ )

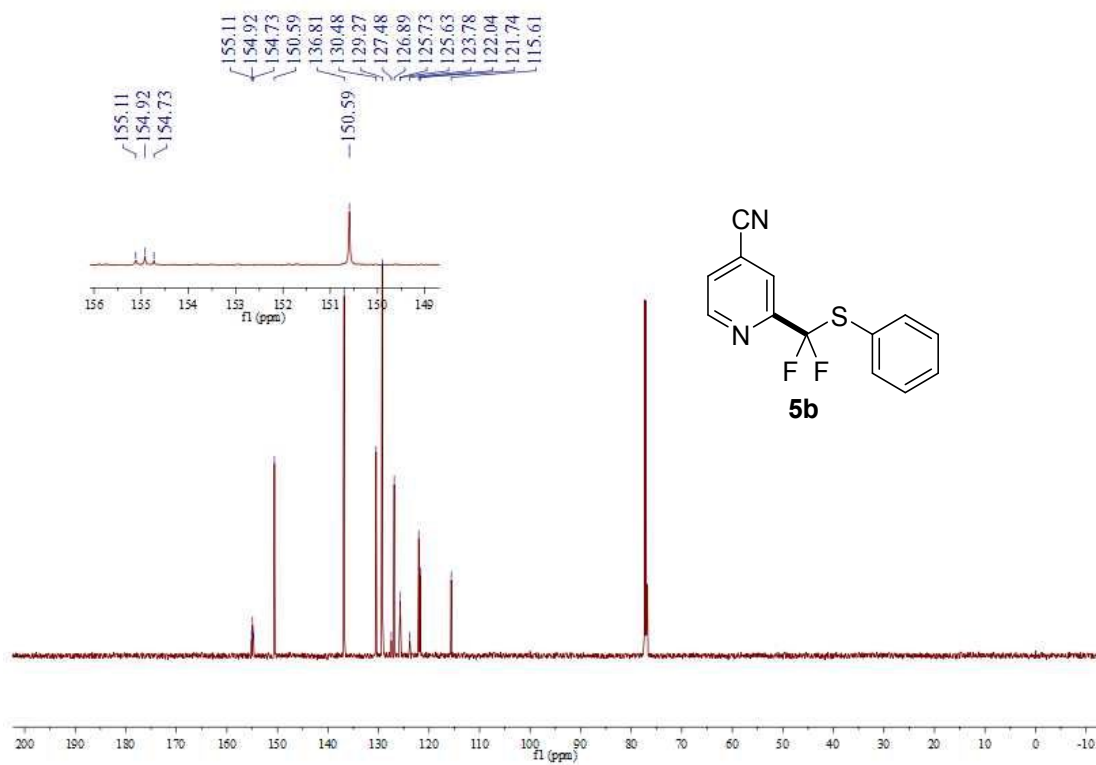

$^{19}\text{F}$  NMR (377 MHz,  $\text{CDCl}_3$ )

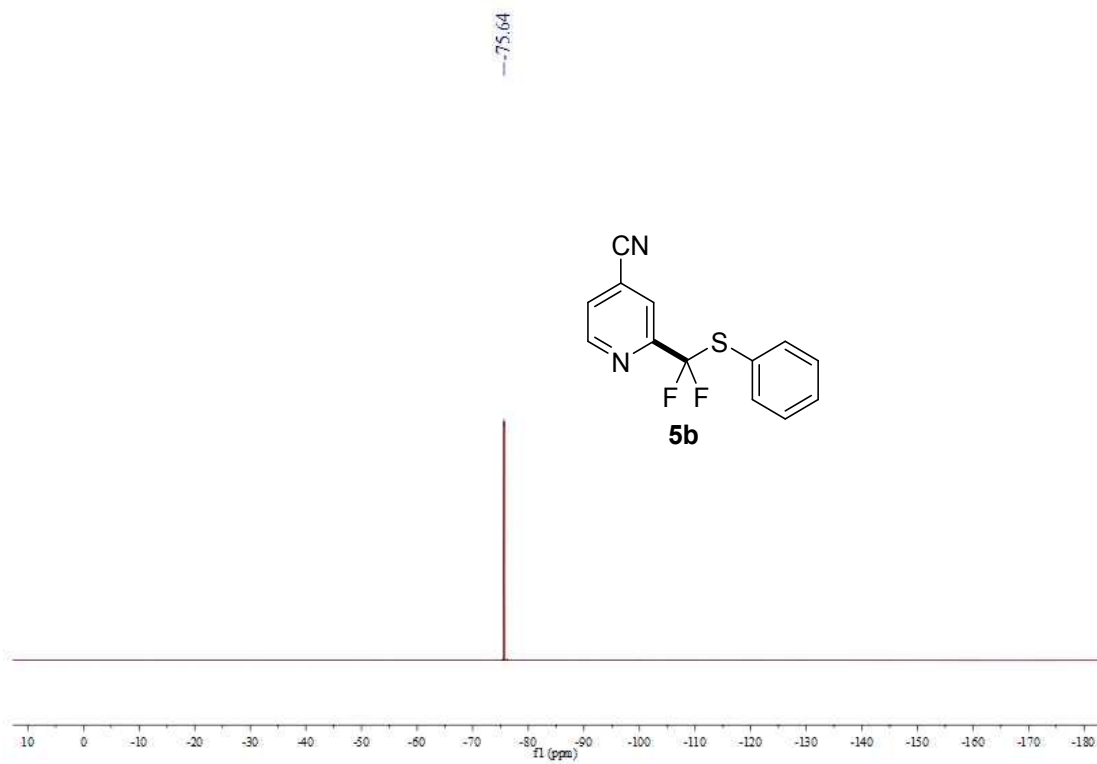

$^1\text{H}$  NMR (400 MHz,  $\text{CDCl}_3$ )

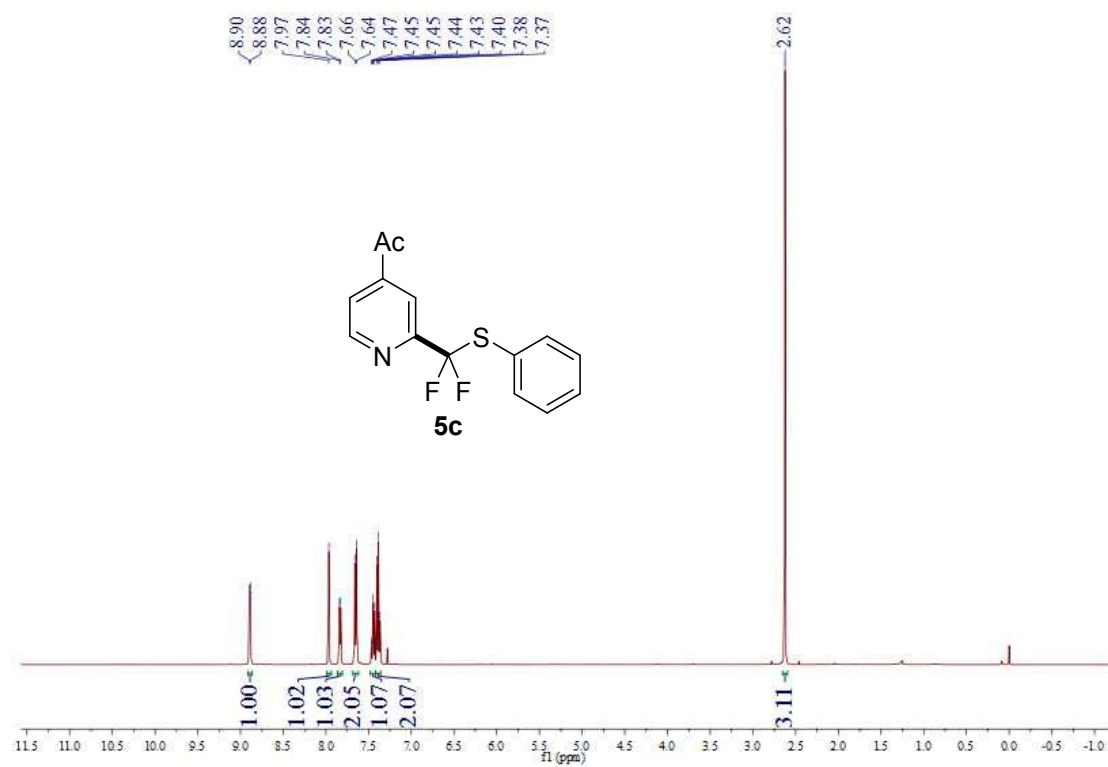

$^{13}\text{C}$  NMR (151 MHz,  $\text{CDCl}_3$ )

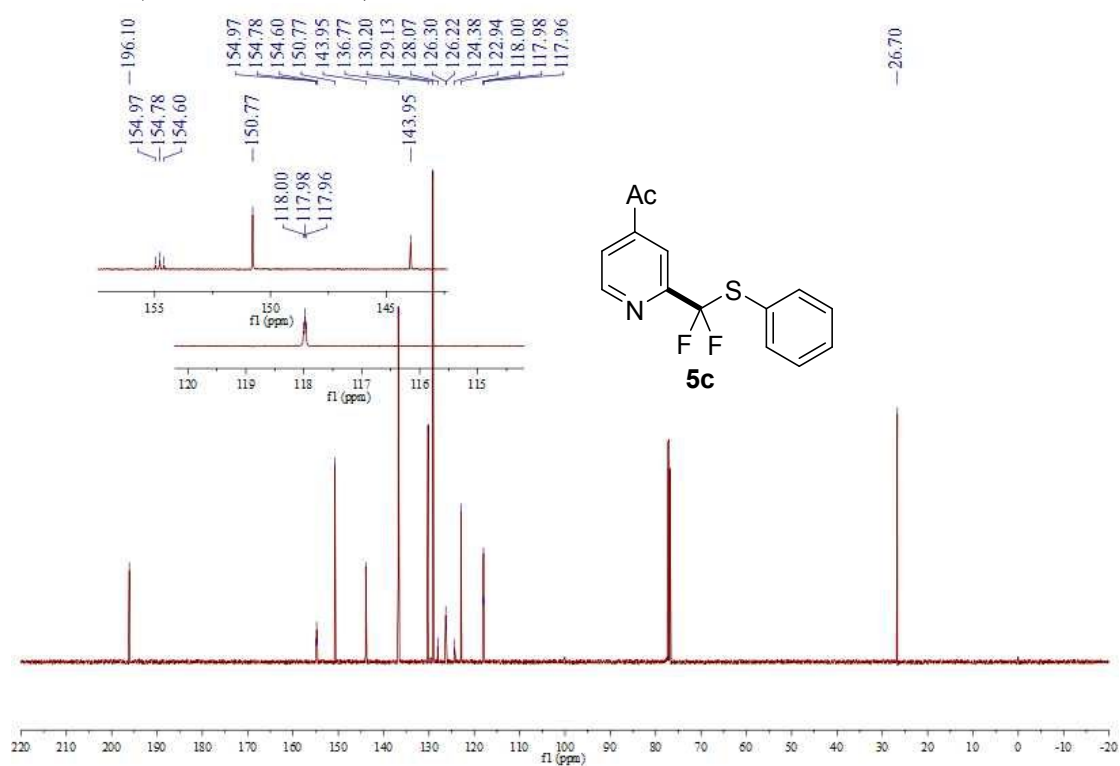

$^{19}\text{F}$  NMR (377 MHz,  $\text{CDCl}_3$ )

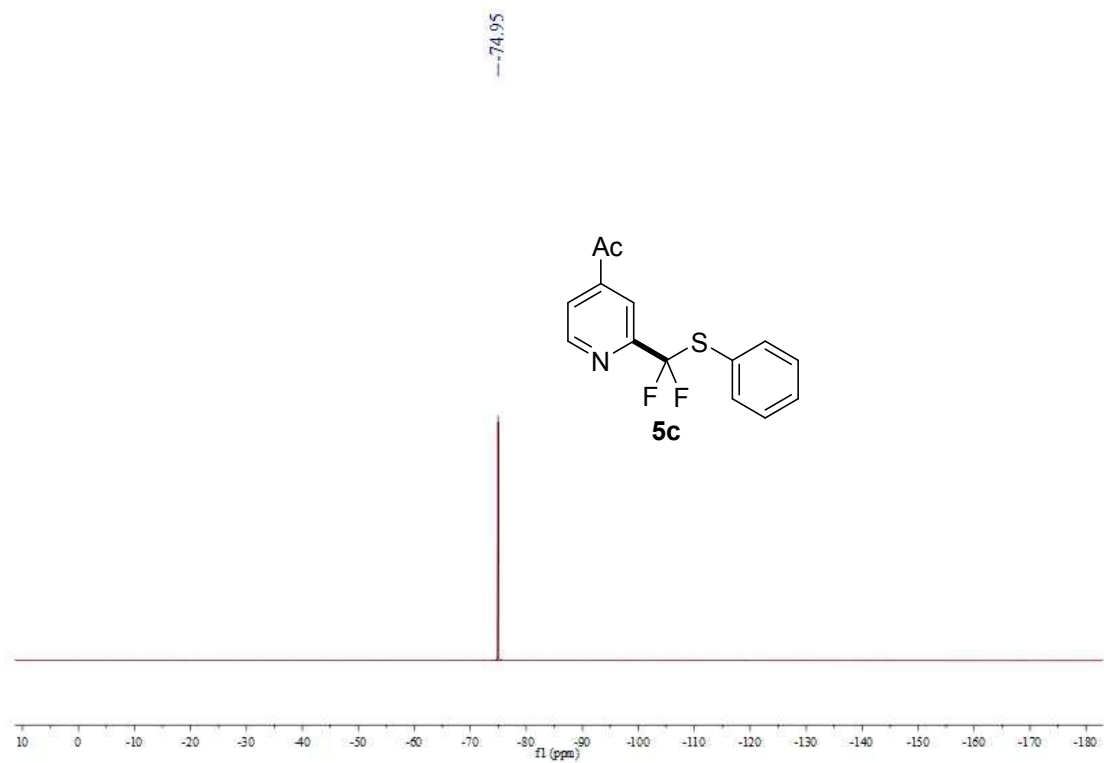

$^1\text{H}$  NMR (400 MHz,  $\text{CDCl}_3$ )

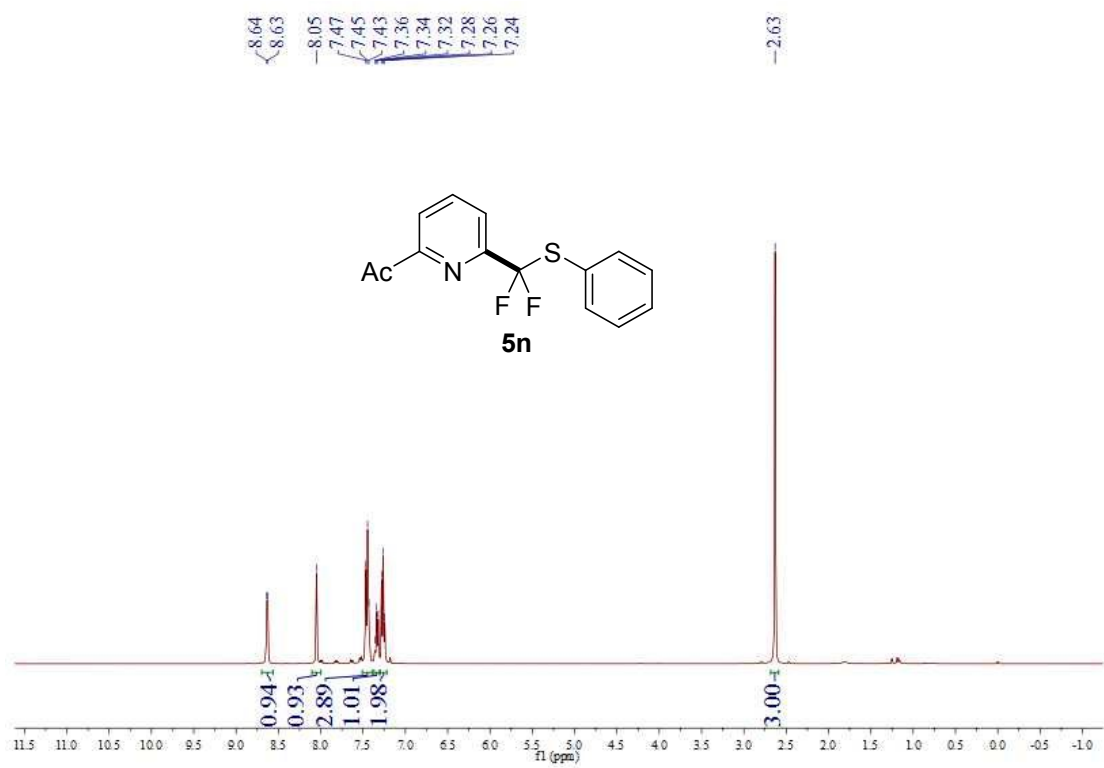

$^{13}\text{C}$  NMR (101 MHz,  $\text{CDCl}_3$ )

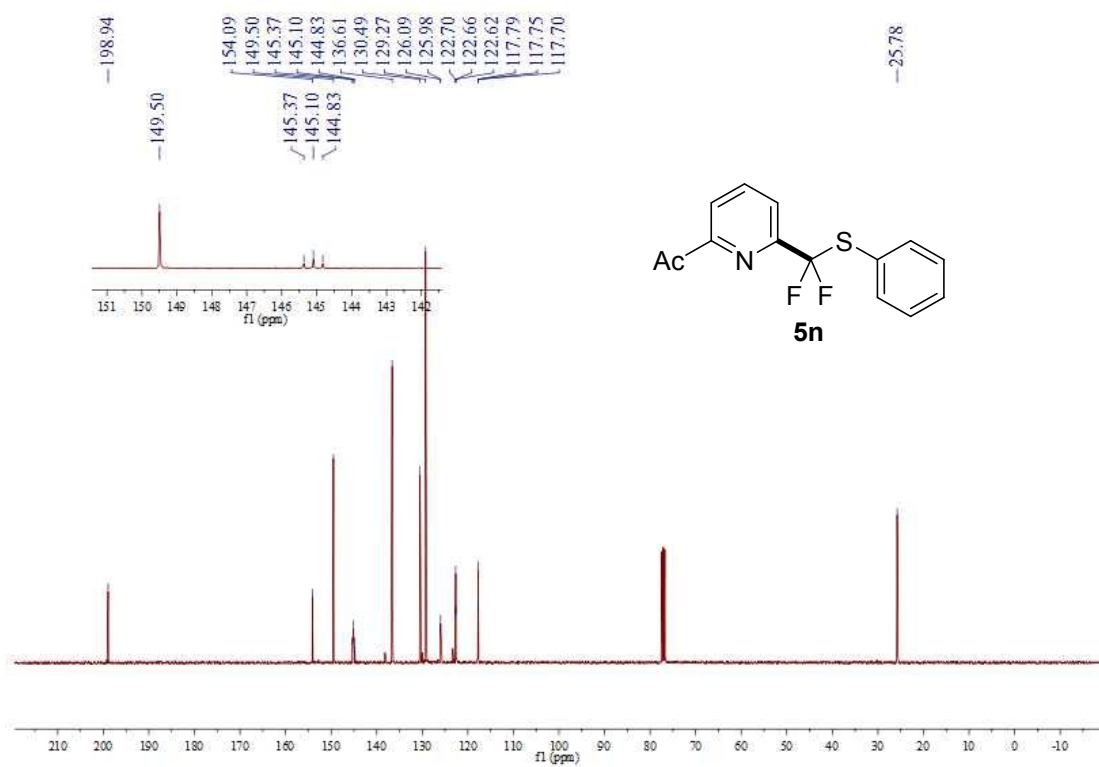

$^{19}\text{F}$  NMR (377 MHz,  $\text{CDCl}_3$ )

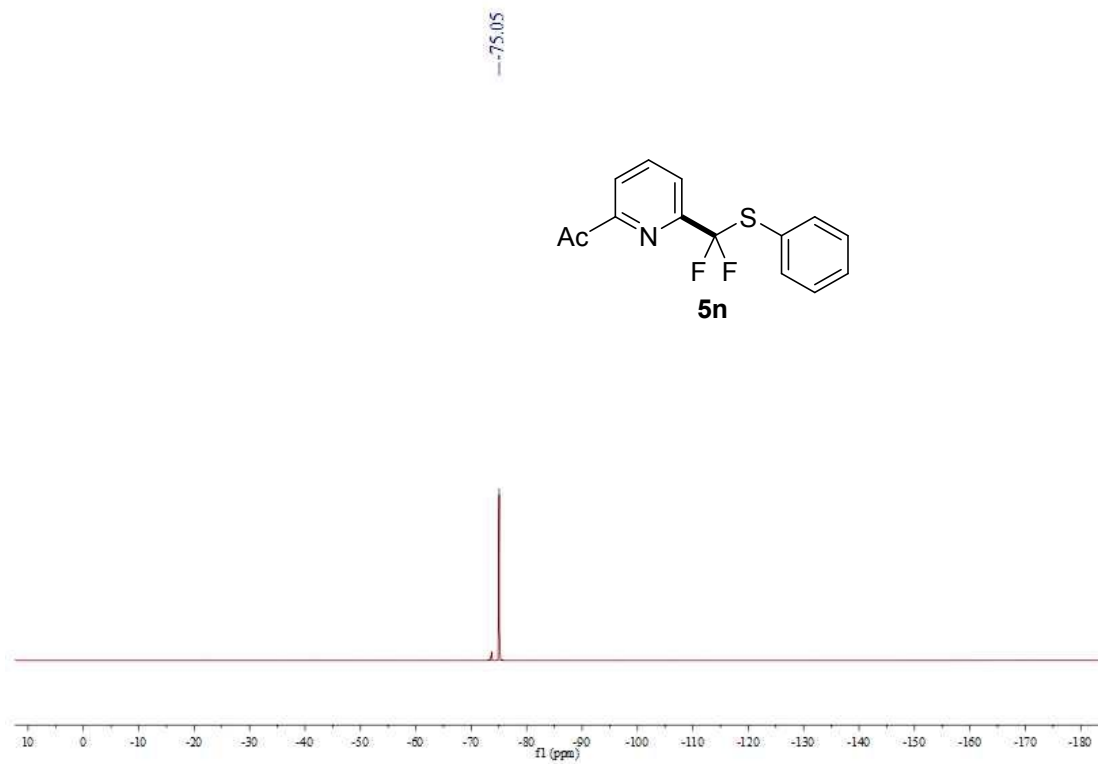



$^1\text{H}$  NMR (400 MHz,  $\text{CDCl}_3$ )

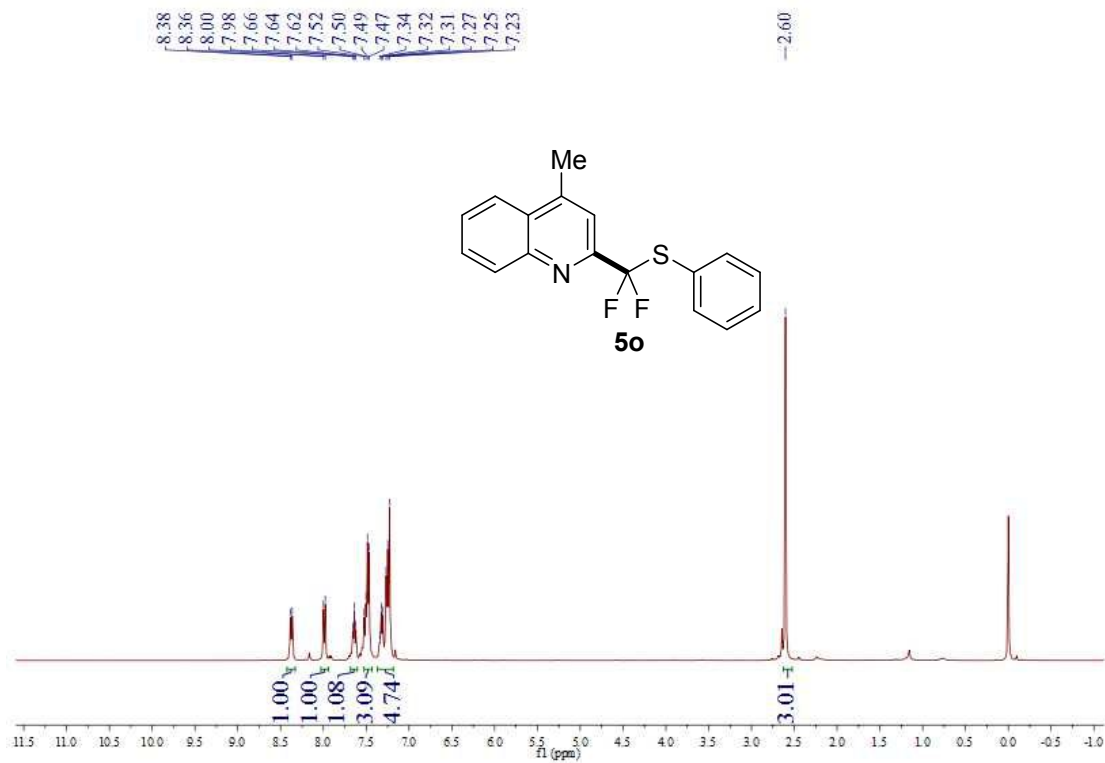

$^{13}\text{C}$  NMR (101 MHz,  $\text{CDCl}_3$ )

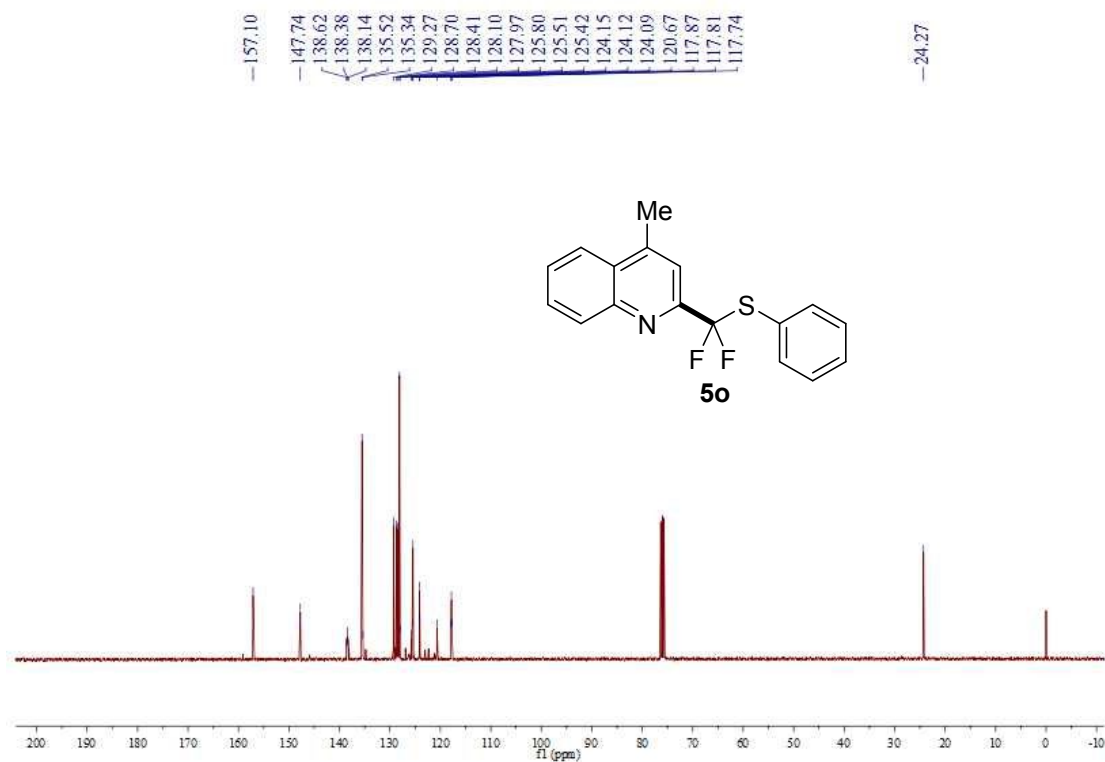

$^{19}\text{F}$  NMR (377 MHz,  $\text{CDCl}_3$ )

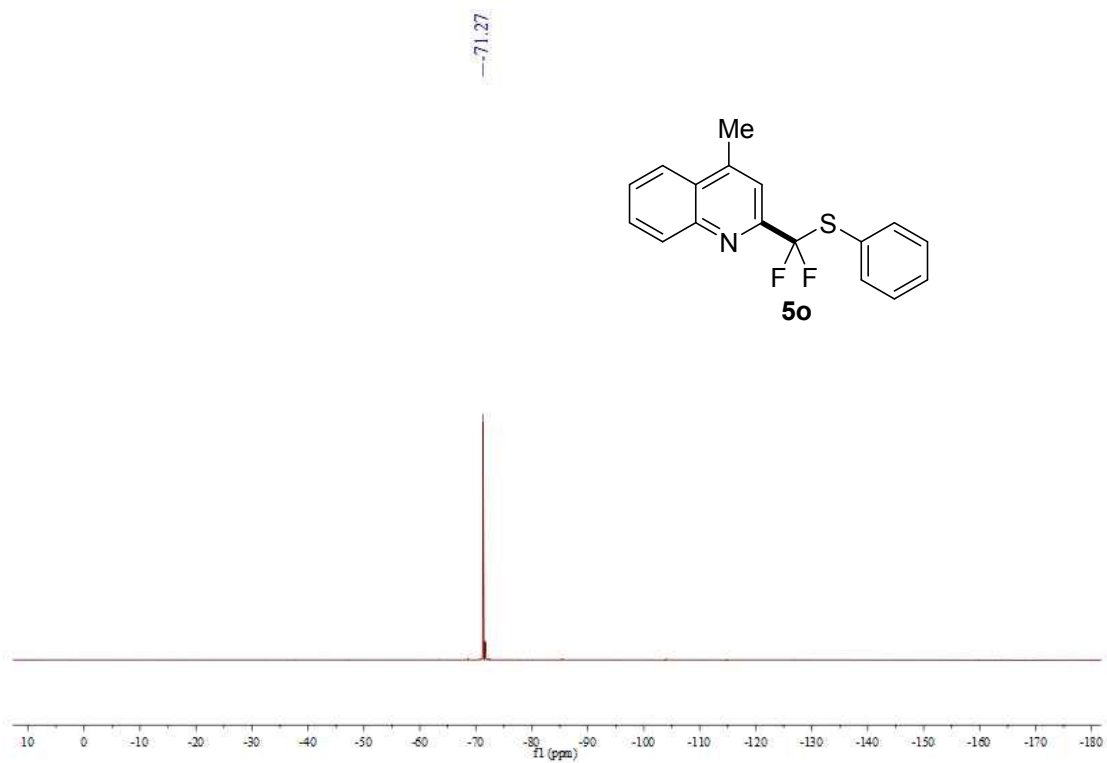

$^1\text{H}$  NMR (400 MHz,  $\text{CDCl}_3$ )

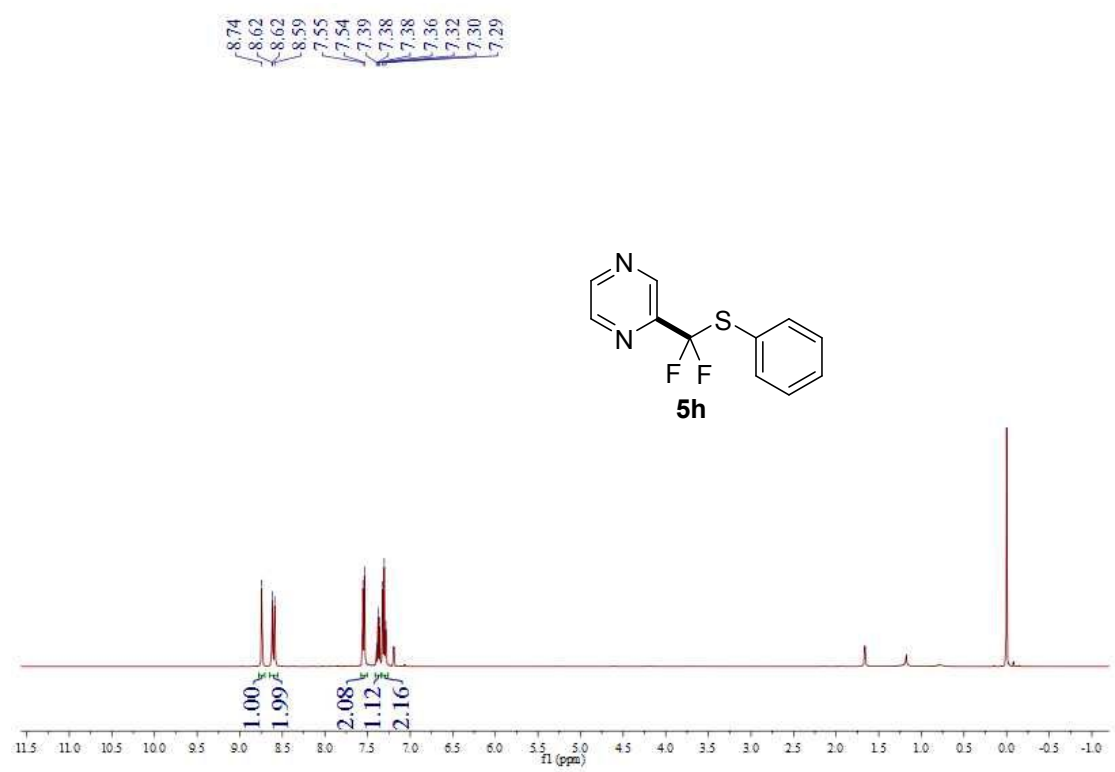

$^{13}\text{C}$  NMR (101 MHz,  $\text{CDCl}_3$ )

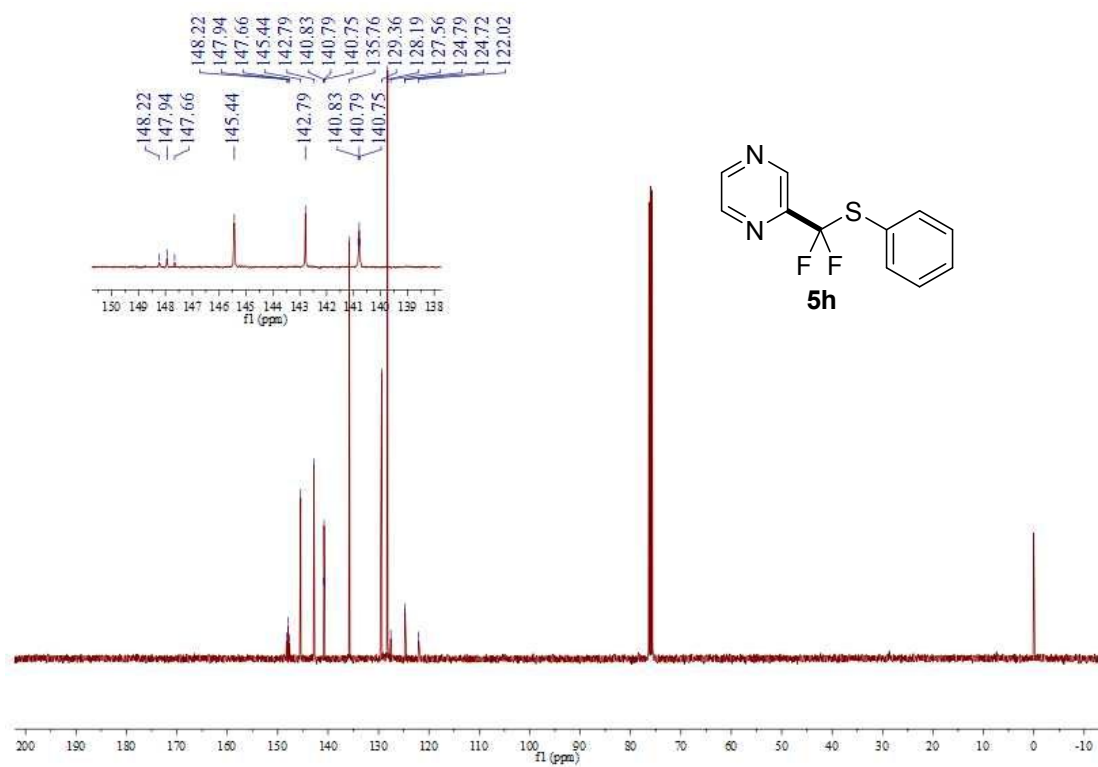

$^{19}\text{F}$  NMR (377 MHz,  $\text{CDCl}_3$ )

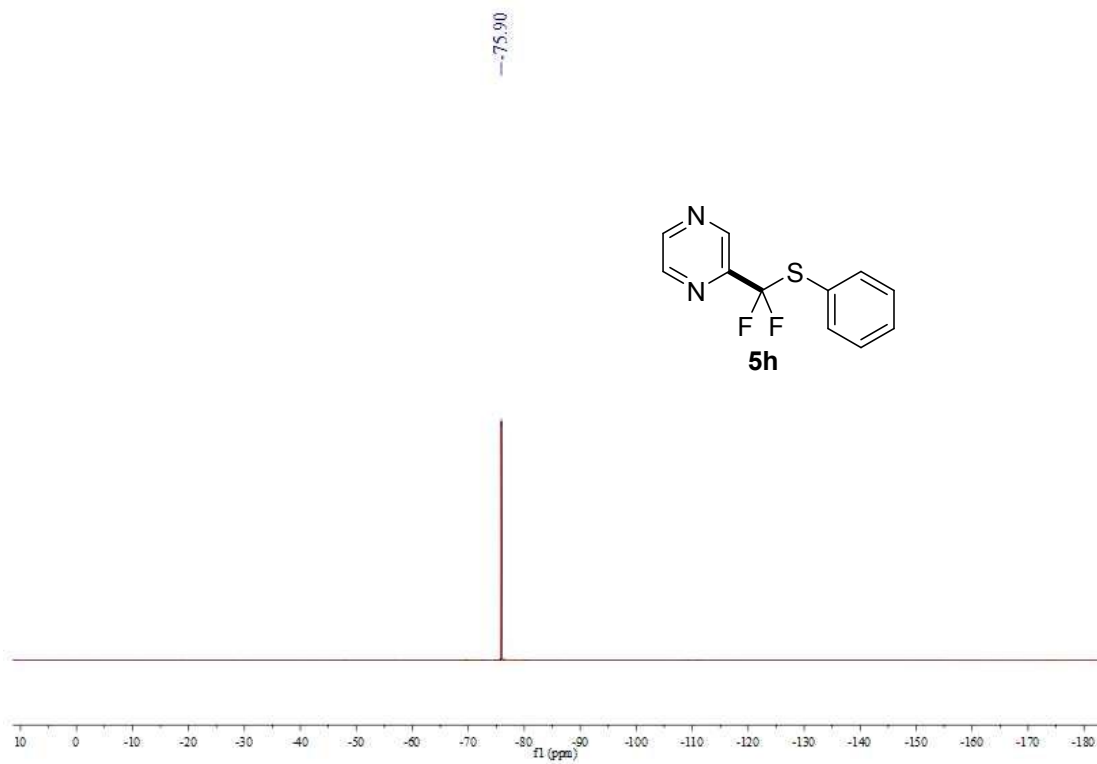

$^1\text{H}$  NMR (400 MHz,  $\text{CDCl}_3$ )

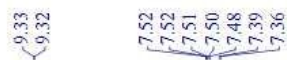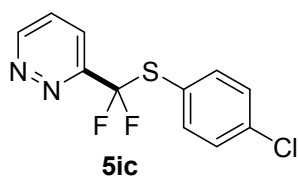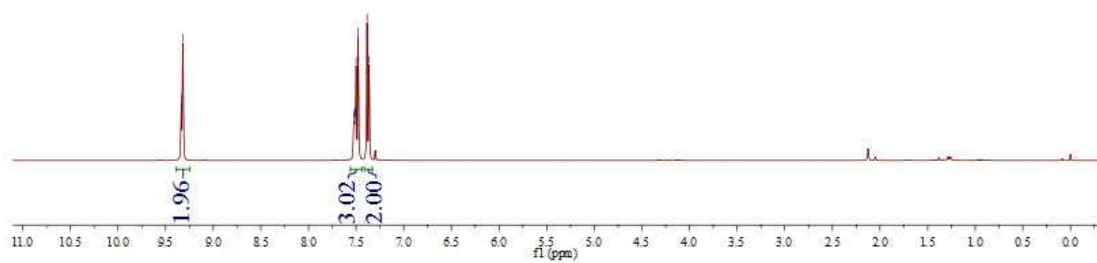

$^{13}\text{C}$  NMR (101 MHz,  $\text{CDCl}_3$ )

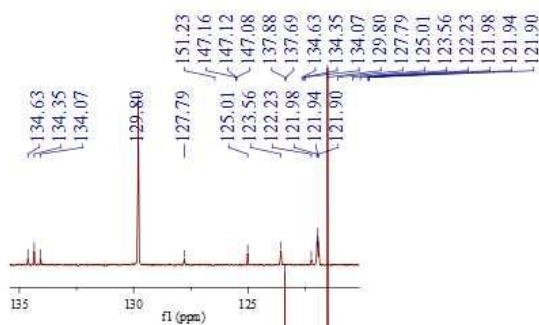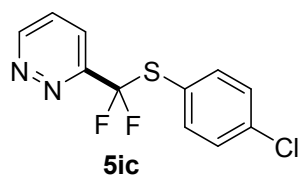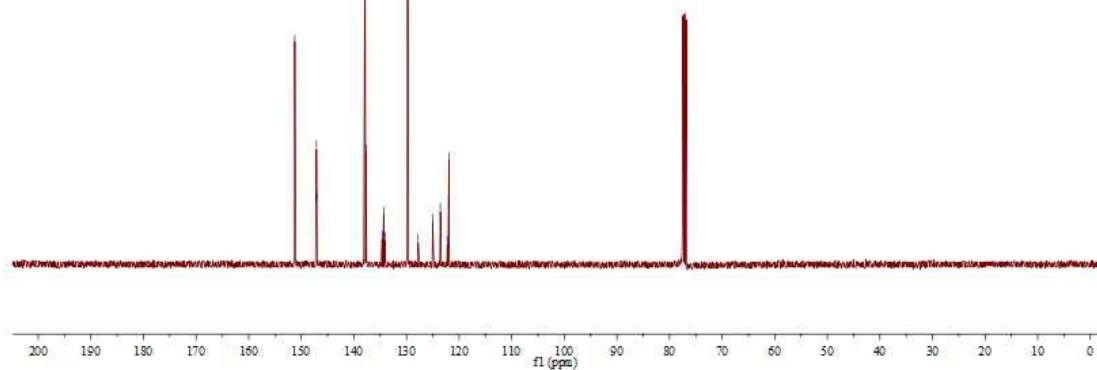

$^{19}\text{F}$  NMR (377 MHz,  $\text{CDCl}_3$ )

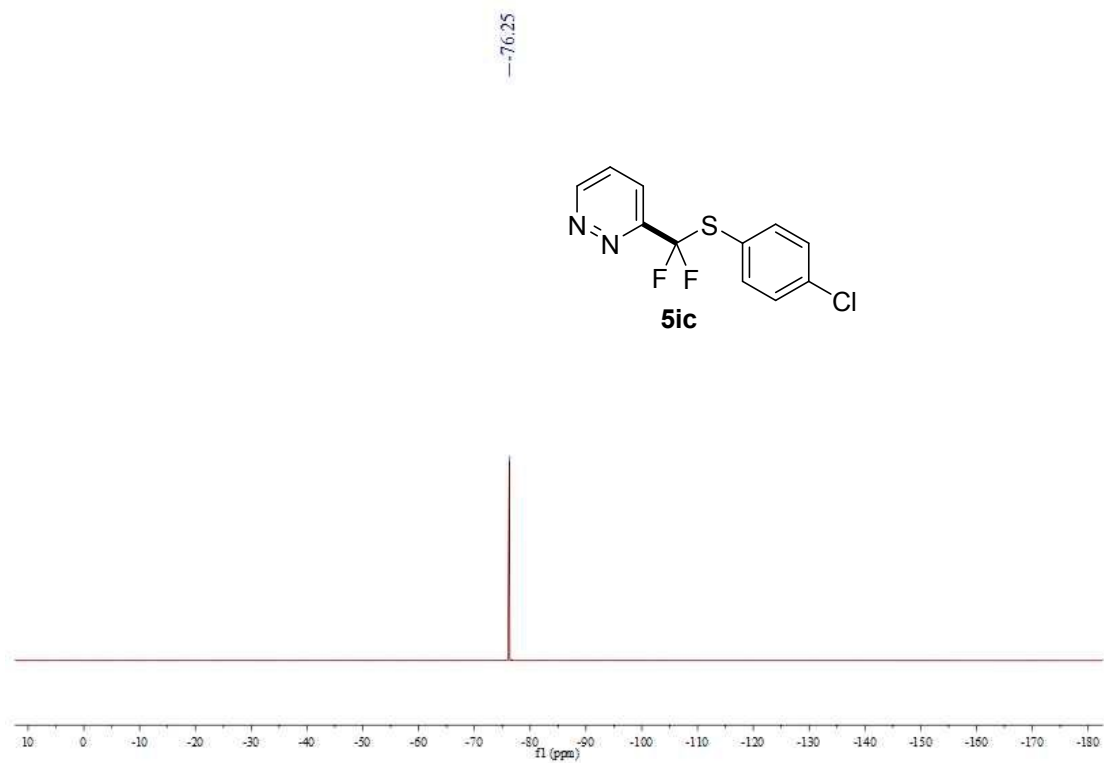

$^1\text{H}$  NMR (400 MHz,  $\text{CDCl}_3$ )

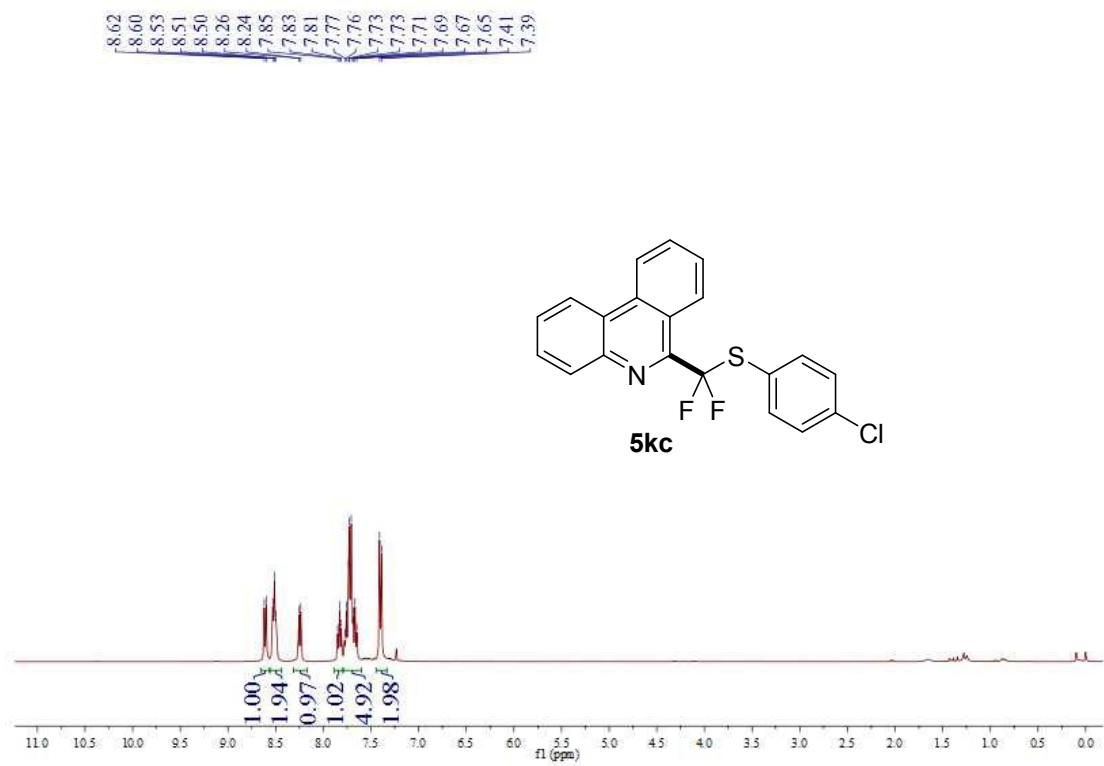

$^{13}\text{C}$  NMR (101 MHz,  $\text{CDCl}_3$ )

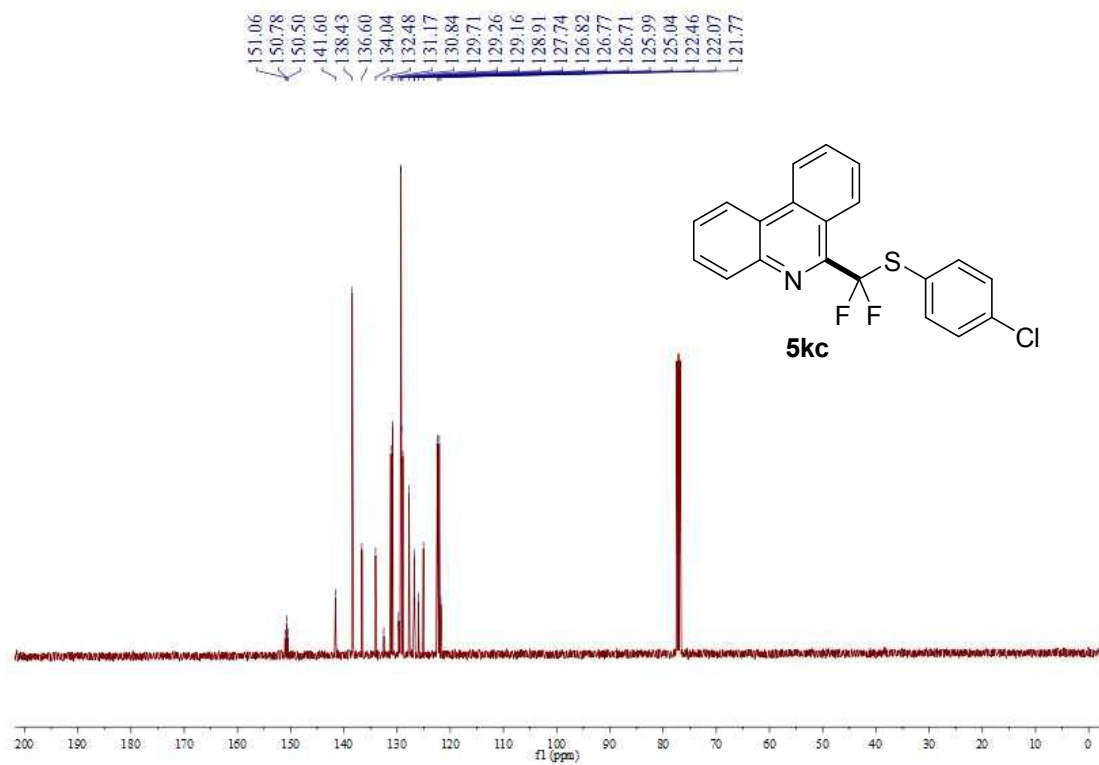

$^{19}\text{F}$  NMR (377 MHz,  $\text{CDCl}_3$ )

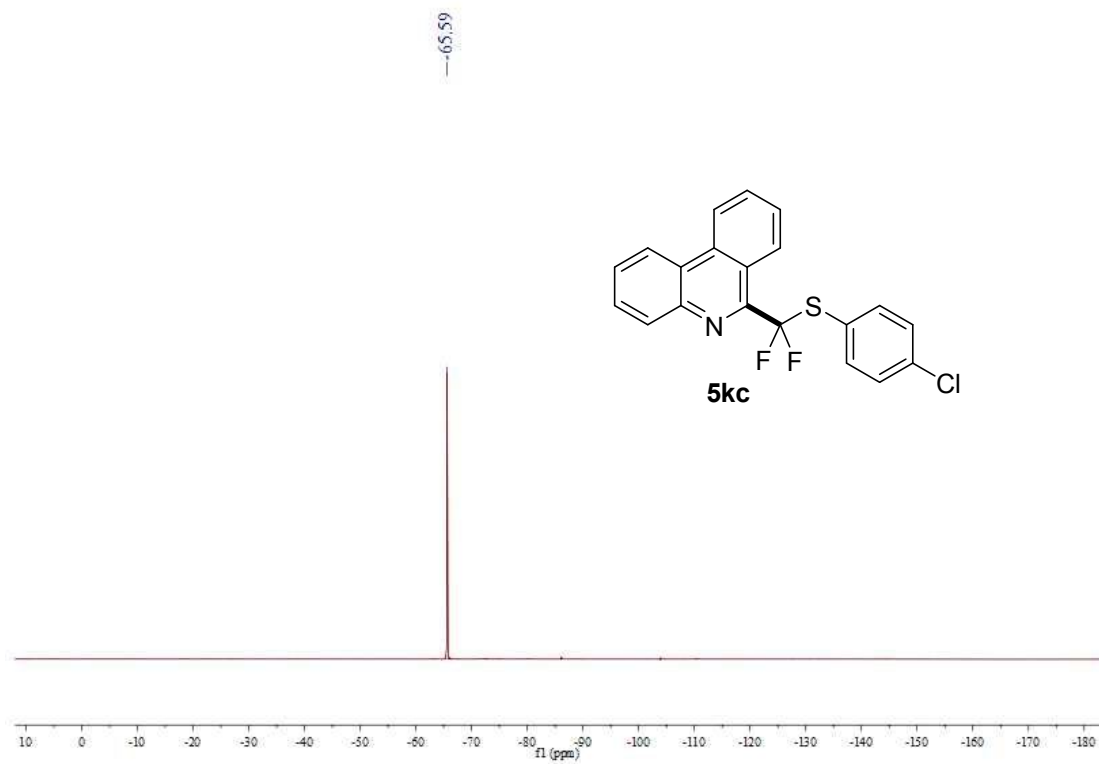

$^1\text{H}$  NMR (400 MHz,  $\text{CDCl}_3$ )

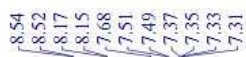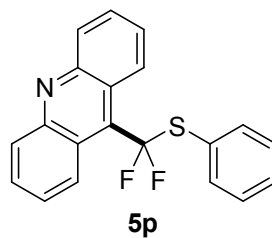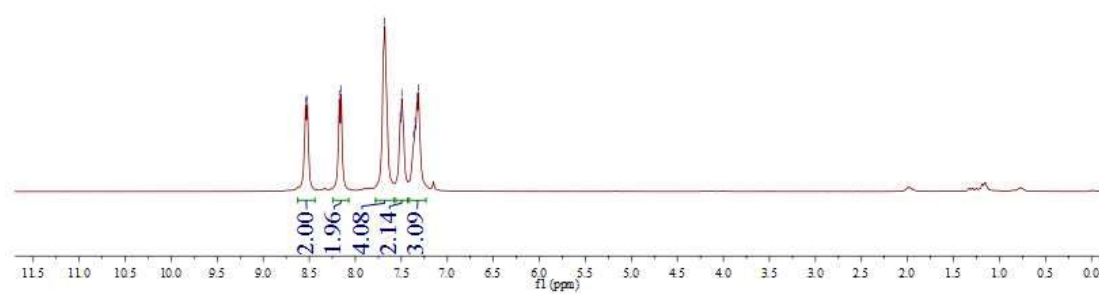

$^{13}\text{C}$  NMR (101 MHz,  $\text{CDCl}_3$ )

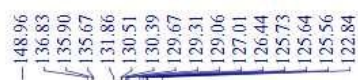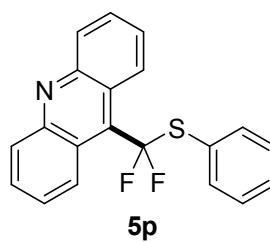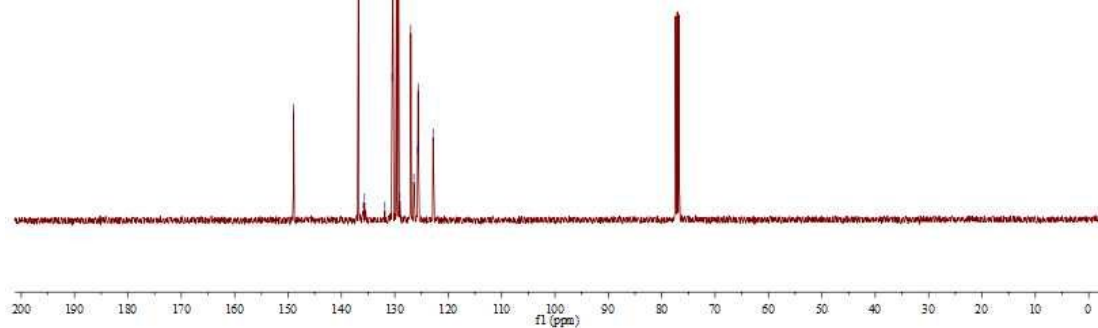

$^{19}\text{F}$  NMR (377 MHz,  $\text{CDCl}_3$ )

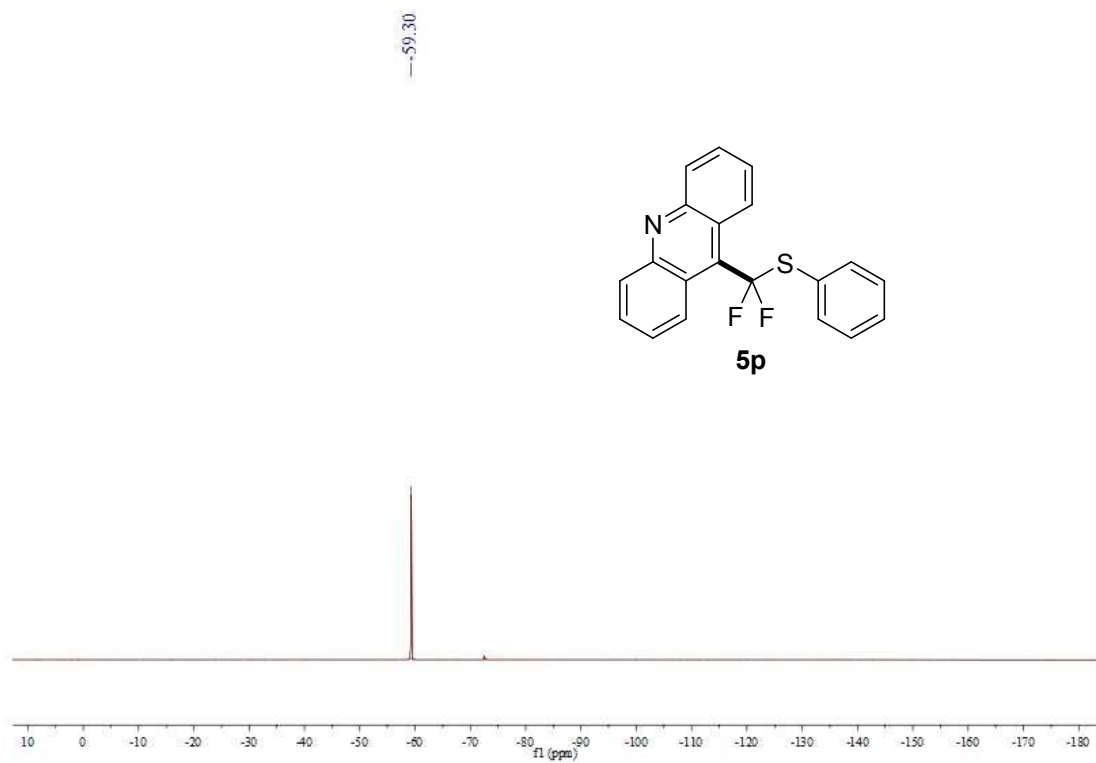

$^1\text{H}$  NMR (400 MHz,  $\text{CDCl}_3$ )

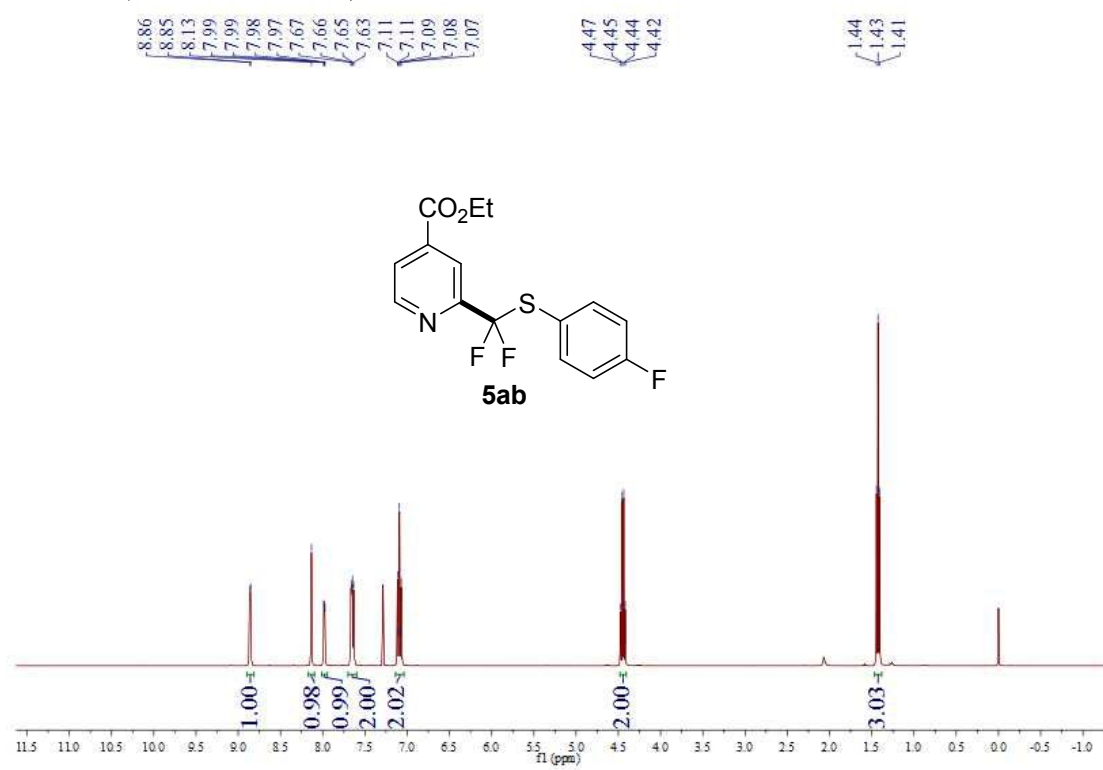



$^{13}\text{C}$  NMR (101 MHz,  $\text{CDCl}_3$ )

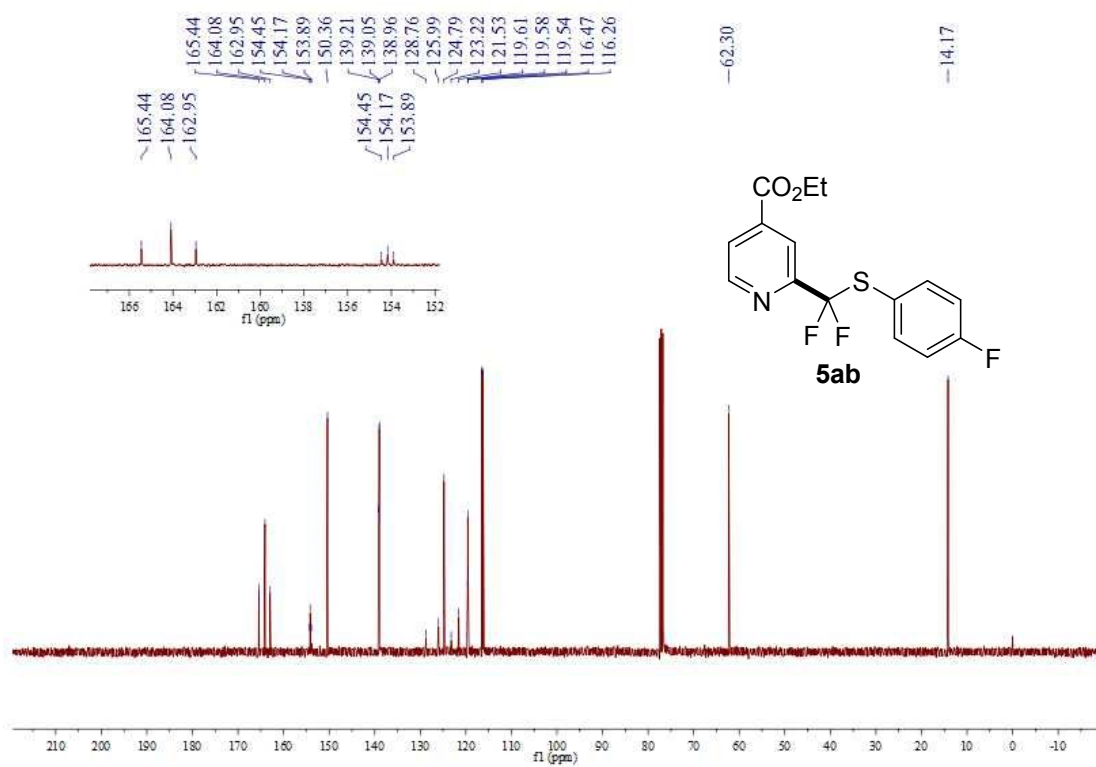

$^{19}\text{F}$  NMR (377 MHz,  $\text{CDCl}_3$ )

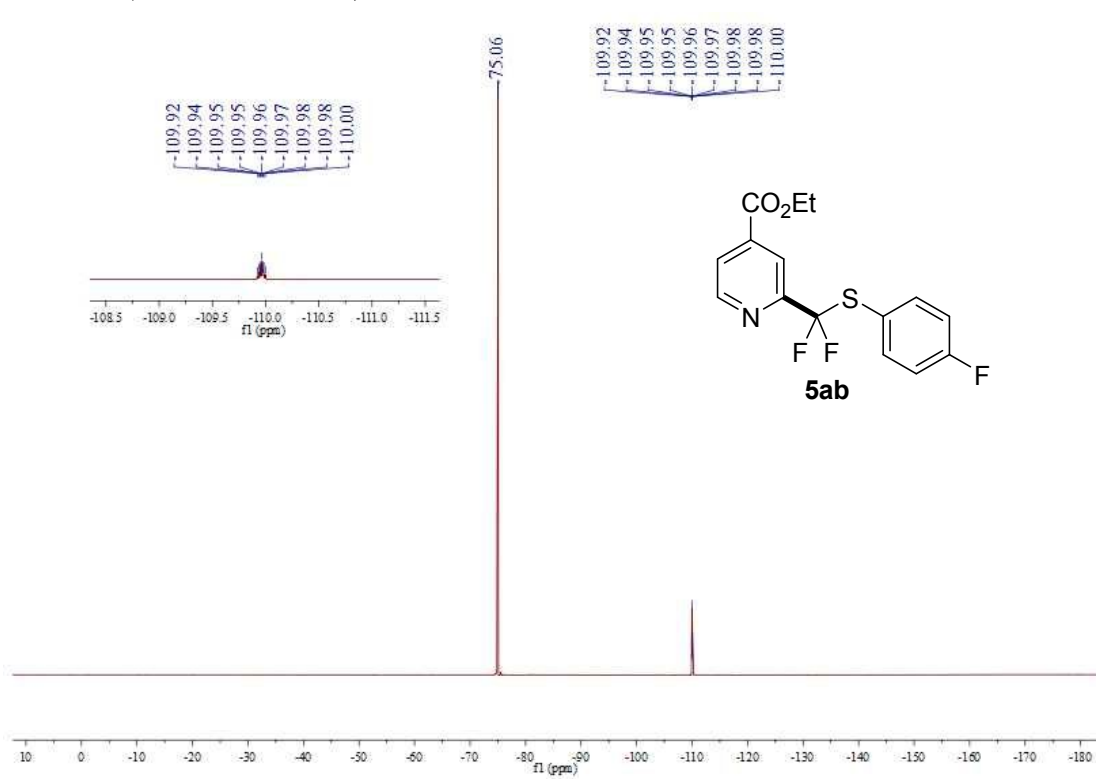

$^1\text{H}$  NMR (400 MHz,  $\text{CDCl}_3$ )

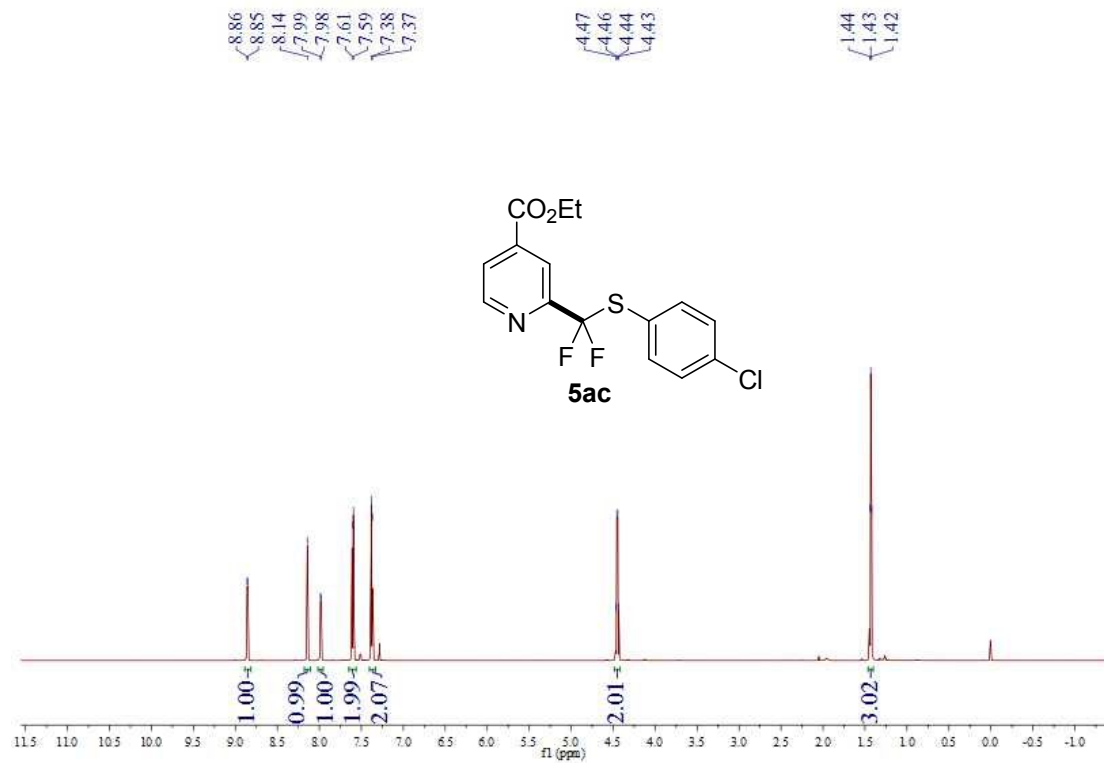

$^{13}\text{C}$  NMR (101 MHz,  $\text{CDCl}_3$ )

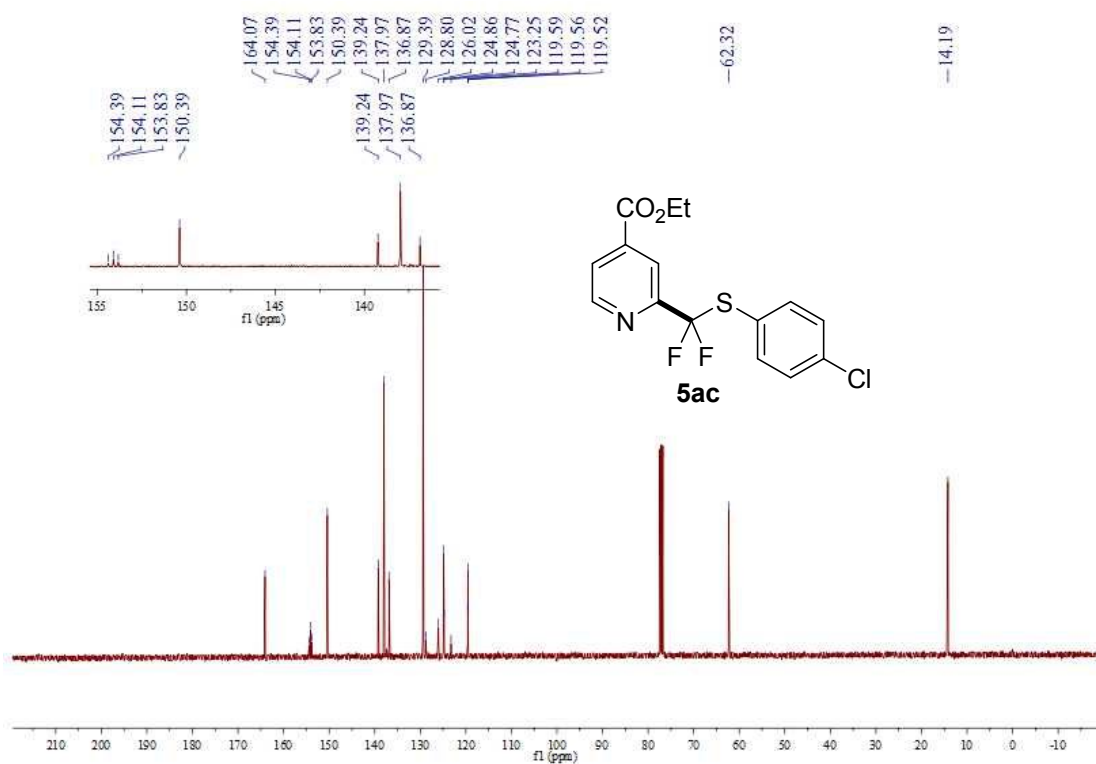

$^{19}\text{F}$  NMR (377 MHz,  $\text{CDCl}_3$ )

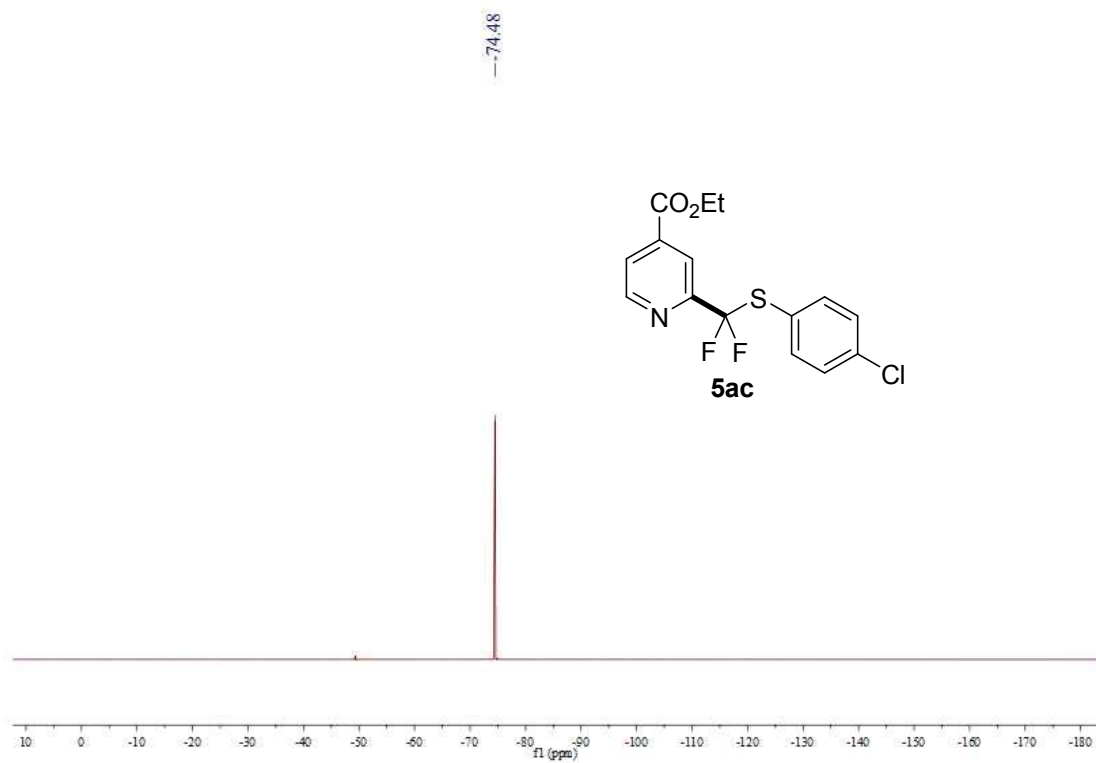

$^1\text{H}$  NMR (400 MHz,  $\text{CDCl}_3$ )

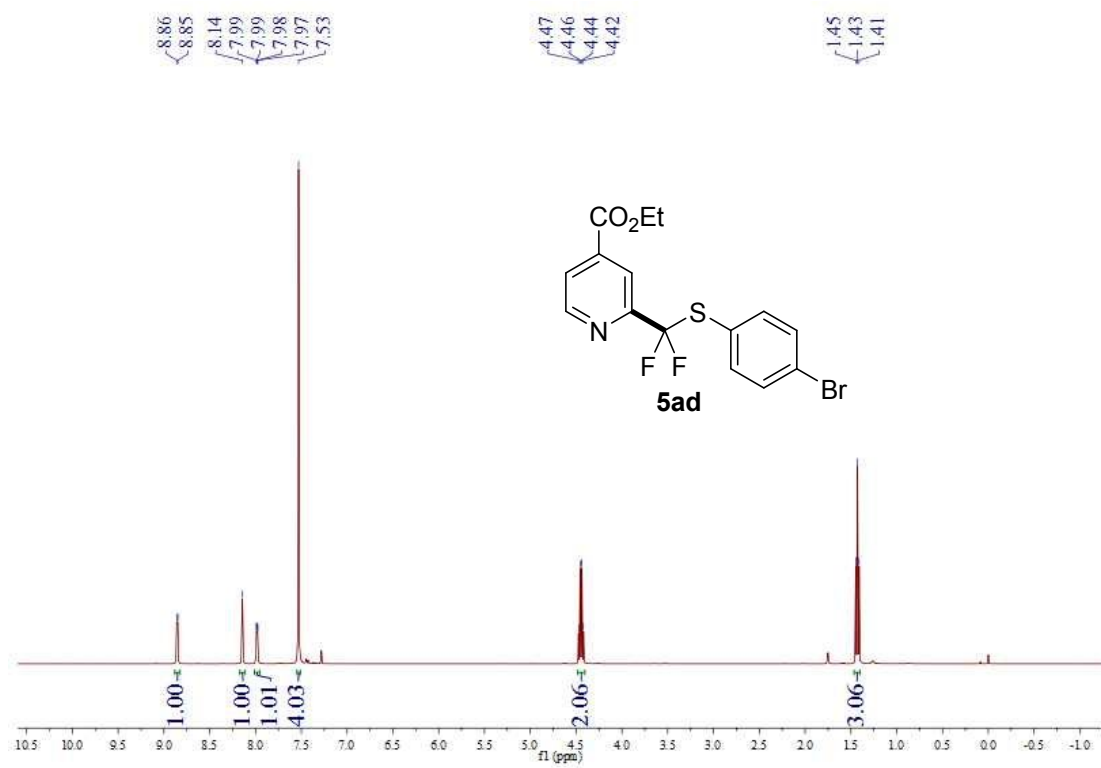

$^{13}\text{C}$  NMR (101 MHz,  $\text{CDCl}_3$ )

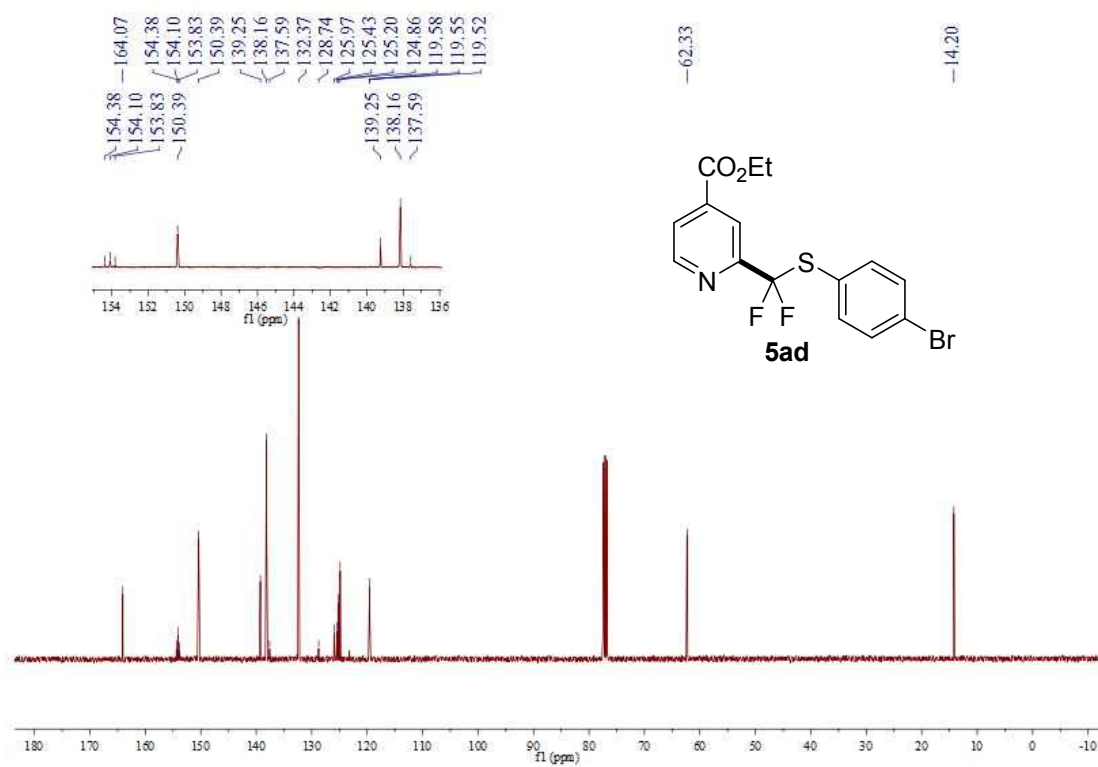

$^{19}\text{F}$  NMR (377 MHz,  $\text{CDCl}_3$ )

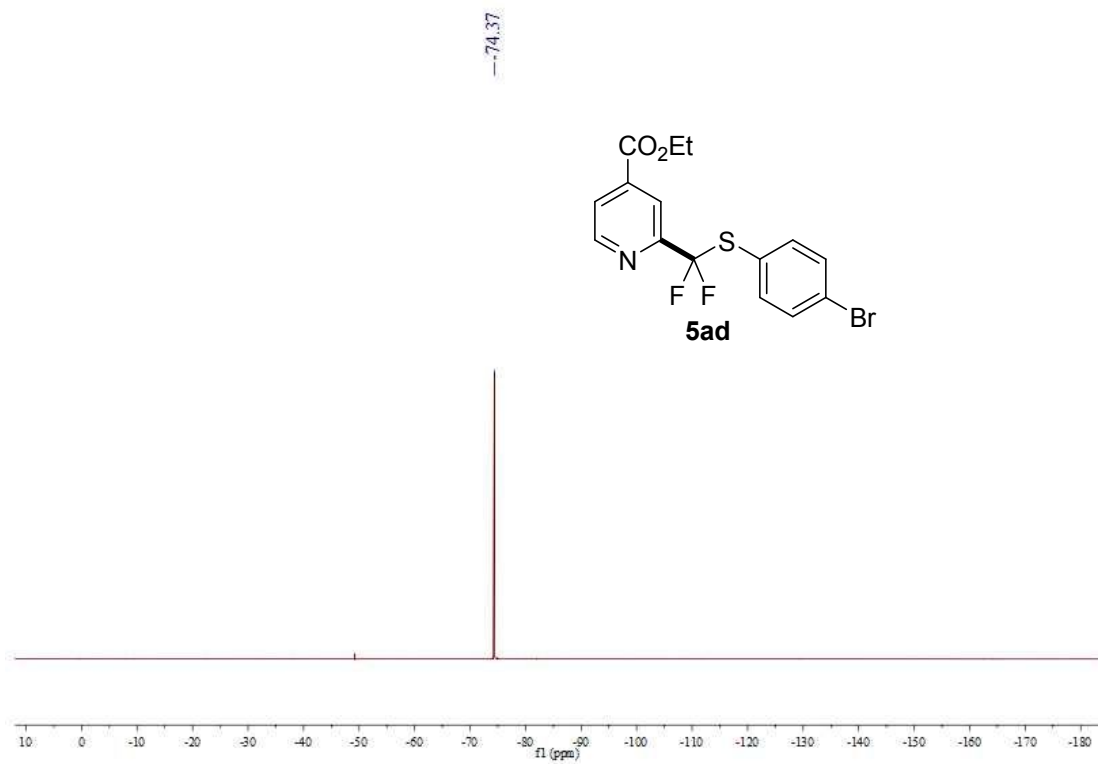

$^1\text{H}$  NMR (400 MHz,  $\text{CDCl}_3$ )

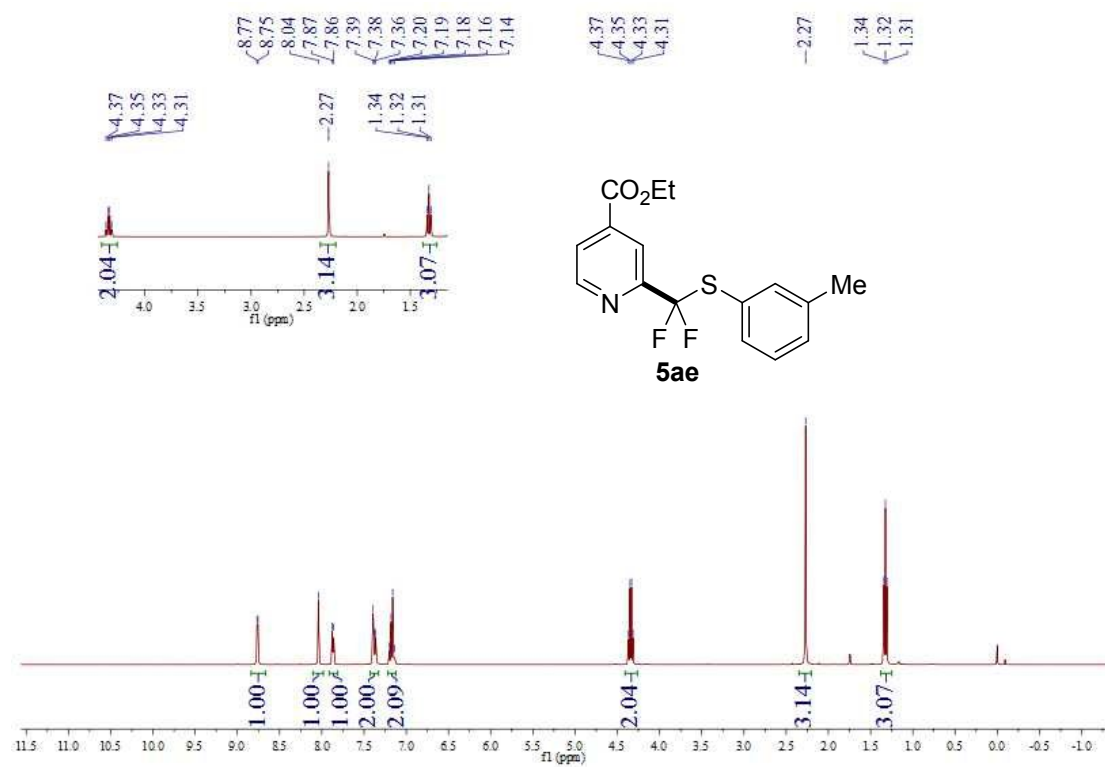

$^{13}\text{C}$  NMR (101 MHz,  $\text{CDCl}_3$ )

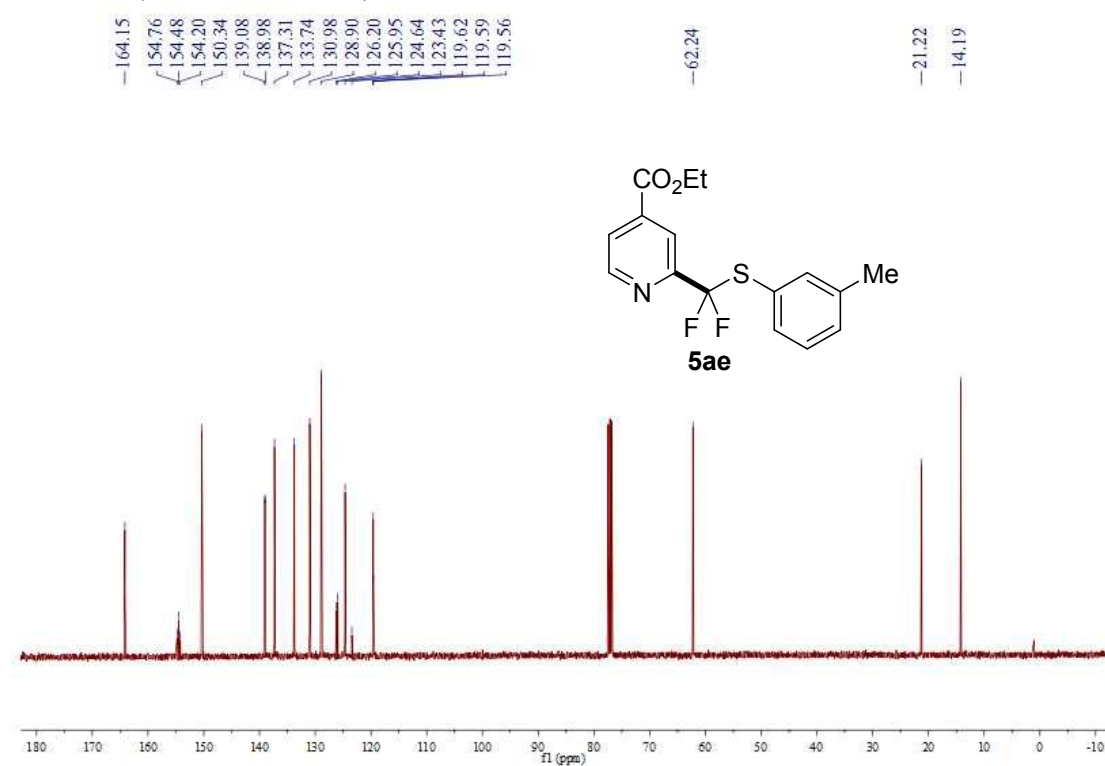

$^{19}\text{F}$  NMR (377 MHz,  $\text{CDCl}_3$ )

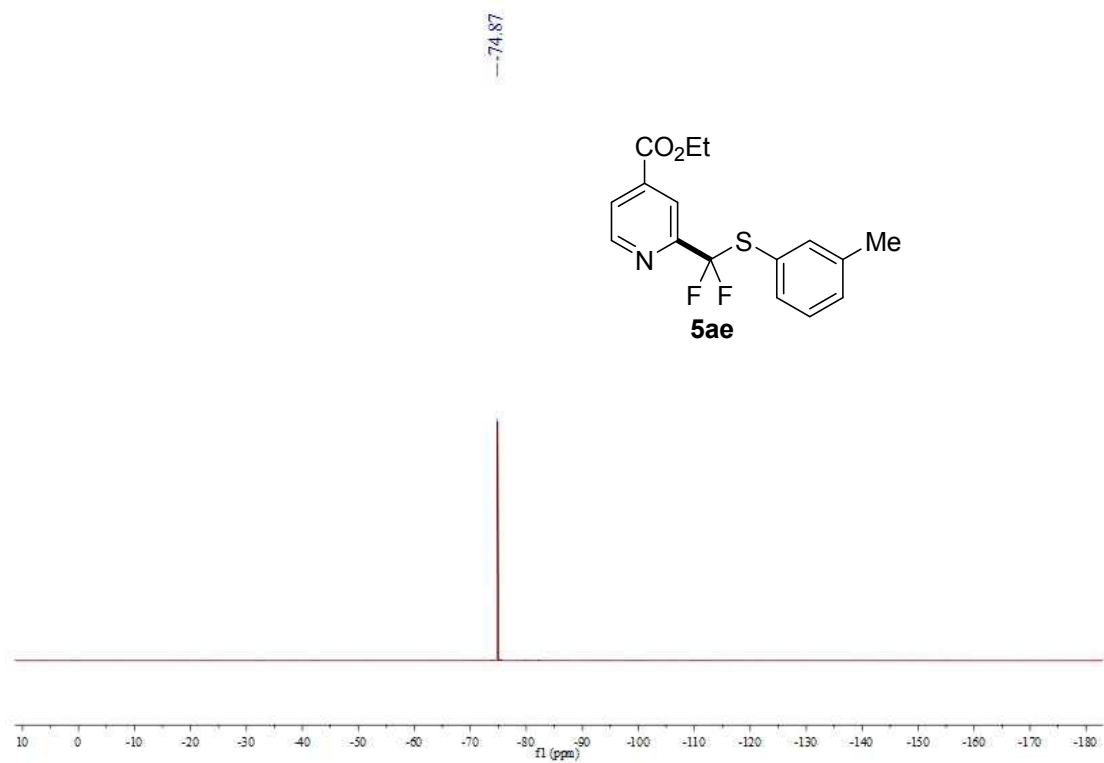

$^1\text{H}$  NMR (400 MHz,  $\text{CDCl}_3$ )

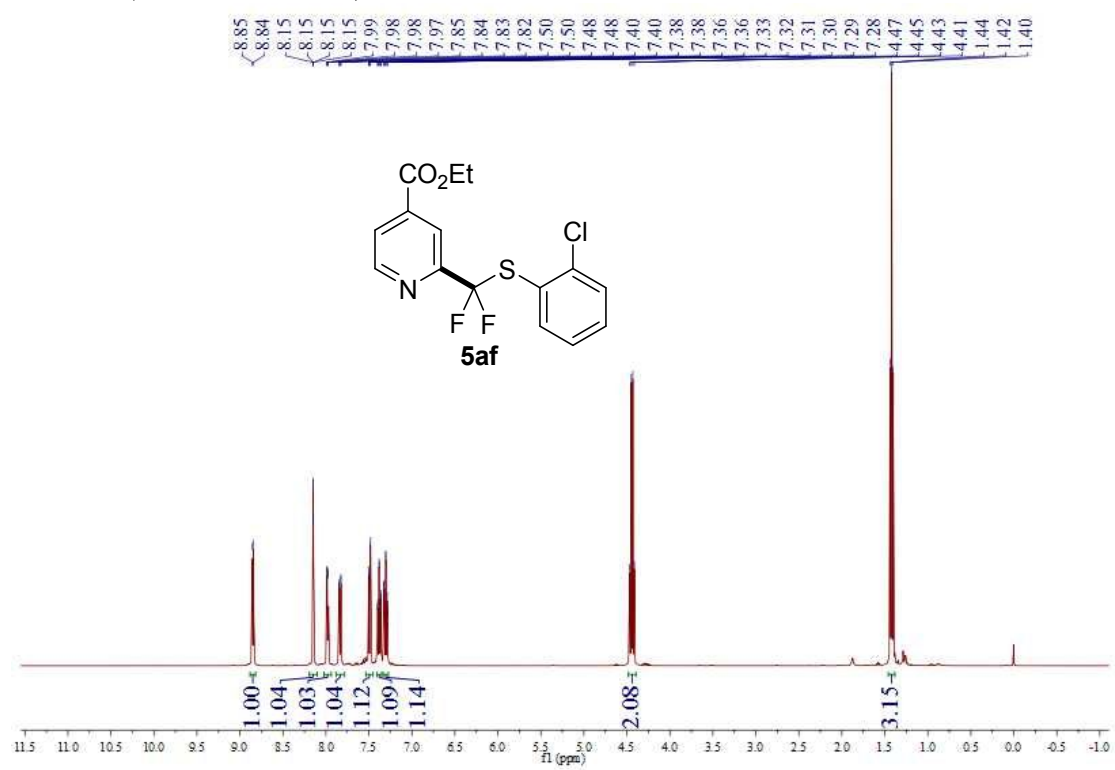

$^{13}\text{C}$  NMR (101 MHz,  $\text{CDCl}_3$ )

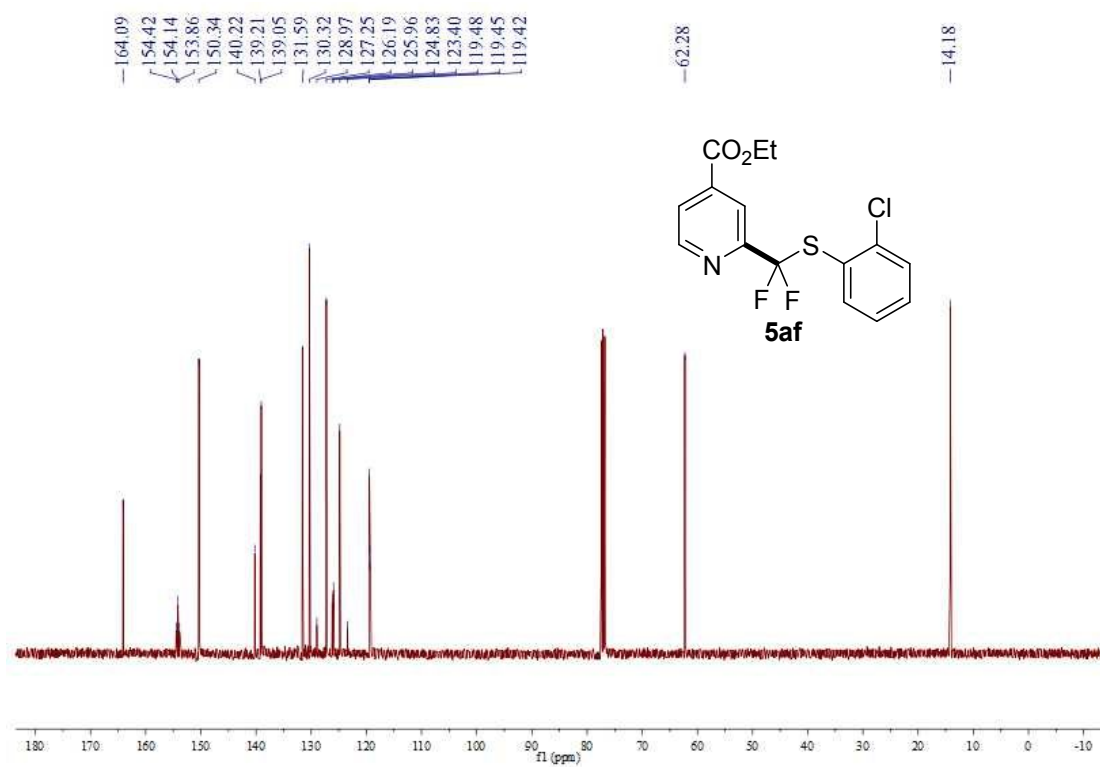

$^{19}\text{F}$  NMR (377 MHz,  $\text{CDCl}_3$ )

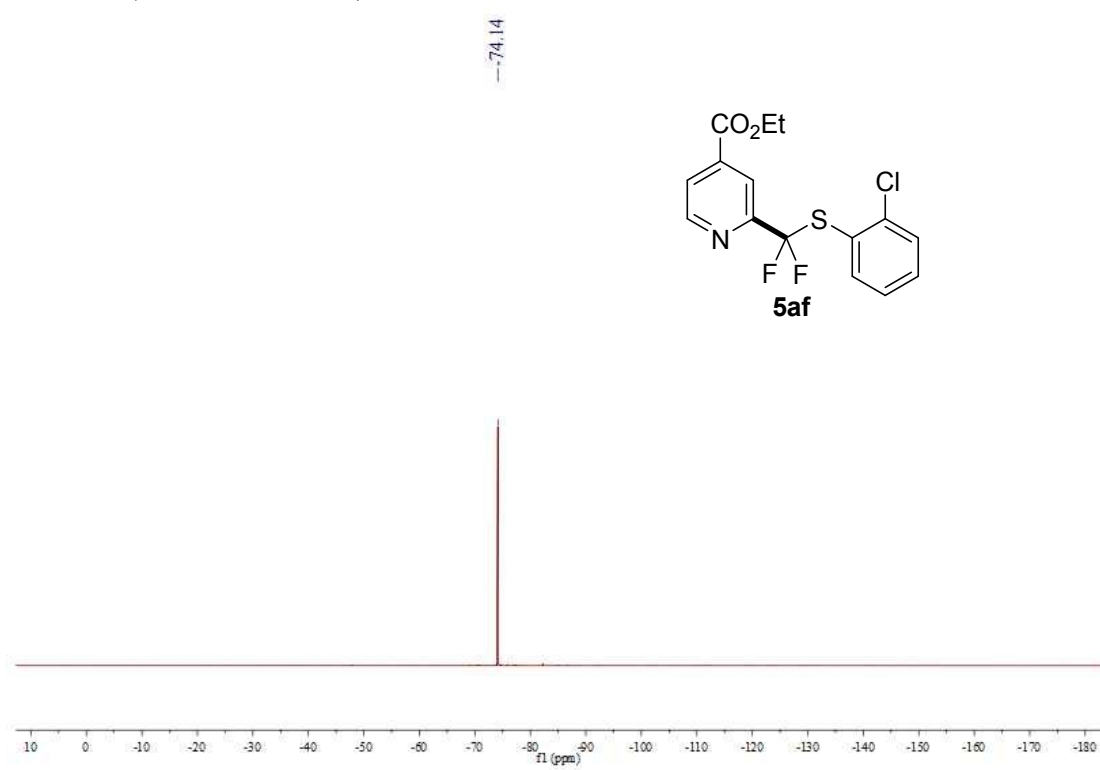

## 11.Copies of HRMS Analysis Reports for the Products

National Center for Organic Mass Spectrometry in Shanghai  
Shanghai Institute of Organic Chemistry  
Chinese Academic of Sciences  
High Resolution MS DATA REPORT

Instrument: Thermo Fisher Scientific LTQ FT Ultra

Card Serial Number : D191543

Sample Serial Number: ZXL-12

Operator : DONG Date: 2019/05/27

Operation Mode: DART POSITIVE

Elemental composition search on mass 294.09

m/z= 289.09-299.09

| m/z      | Theo.<br>Mass | Delta<br>(ppm) | RDB<br>equiv. | Composition                                                                     |
|----------|---------------|----------------|---------------|---------------------------------------------------------------------------------|
| 294.0934 | 294.0934      | 0.00           | 12.0          | C <sub>16</sub> H <sub>14</sub> N <sub>4</sub> S                                |
|          | 294.0934      | -0.19          | 5.0           | C <sub>10</sub> H <sub>13</sub> O <sub>3</sub> N <sub>4</sub> F <sub>3</sub>    |
|          | 294.0935      | -0.31          | -5.0          | C <sub>4</sub> H <sub>21</sub> O <sub>4</sub> N <sub>4</sub> ClF <sub>2</sub> S |
|          | 294.0932      | 0.67           | 3.0           | C <sub>12</sub> H <sub>19</sub> O <sub>5</sub> FS                               |
|          | 294.0936      | -0.87          | 8.5           | C <sub>15</sub> H <sub>14</sub> O <sub>3</sub> NF <sub>2</sub>                  |
|          | 294.0937      | -0.99          | -1.5          | C <sub>9</sub> H <sub>22</sub> O <sub>4</sub> NClFS                             |

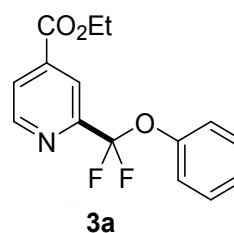

National Center for Organic Mass Spectrometry in Shanghai  
Shanghai Institute of Organic Chemistry  
Chinese Academic of Sciences  
High Resolution MS ESI REPORT

Instrument: Thermo Scientific Q Exactive HF Orbitrap-FTMS

Card Serial Number: E190789

Sample Serial Number: ZXL-7

Operator: Songw Date: 2019/05/29

Operation Mode: ESI Positive Ion Mode

Elemental composition search on mass 247.07

m/z= 242.07-252.07

| m/z      | Theo.<br>Mass | Delta<br>(ppm) | RDB<br>equiv. | Composition                                                   |
|----------|---------------|----------------|---------------|---------------------------------------------------------------|
| 247.0673 | 247.0677      | -1.76          | 9.5           | C <sub>13</sub> H <sub>9</sub> ON <sub>2</sub> F <sub>2</sub> |
|          | 247.0666      | 2.86           | 13.5          | C <sub>16</sub> H <sub>8</sub> N <sub>2</sub> F               |
|          | 247.0664      | 3.67           | 10.0          | C <sub>11</sub> H <sub>7</sub> N <sub>5</sub> F <sub>2</sub>  |

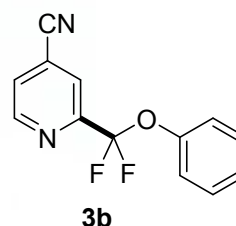



National Center for Organic Mass Spectrometry in Shanghai  
Shanghai Institute of Organic Chemistry  
Chinese Academic of Sciences  
High Resolution MS ESI REPORT

Instrument: Thermo Scientific Q Exactive HF Orbitrap-FTMS

Card Serial Number: E190788

Sample Serial Number: ZXL-8

Operator: Songw Date: 2019/05/29

Operation Mode: ESI Positive Ion Mode

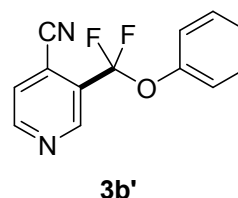

Elemental composition search on mass 247.07

| m/z      | Theo. Mass | Delta (ppm) | RDB equiv. | Composition                                                   |
|----------|------------|-------------|------------|---------------------------------------------------------------|
| 247.0672 | 247.0677   | -2.29       | 9.5        | C <sub>13</sub> H <sub>9</sub> ON <sub>2</sub> F <sub>2</sub> |
|          | 247.0666   | 2.34        | 13.5       | C <sub>16</sub> H <sub>8</sub> N <sub>2</sub> F               |
|          | 247.0664   | 3.14        | 10.0       | C <sub>11</sub> H <sub>7</sub> N <sub>5</sub> F <sub>2</sub>  |

National Center for Organic Mass Spectrometry in Shanghai  
Shanghai Institute of Organic Chemistry  
Chinese Academic of Sciences  
High Resolution MS ESI REPORT

Instrument: Thermo Scientific Q Exactive HF Orbitrap-FTMS

Card Serial Number: E190787

Sample Serial Number: ZXL-9

Operator: Songw Date: 2019/05/29

Operation Mode: ESI Positive Ion Mode

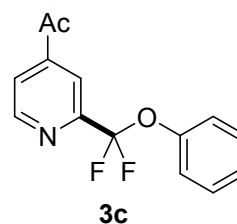

Elemental composition search on mass 264.08

| m/z      | Theo. Mass | Delta (ppm) | RDB equiv. | Composition                                                    |
|----------|------------|-------------|------------|----------------------------------------------------------------|
| 264.0825 | 264.0831   | -2.28       | 8.5        | C <sub>14</sub> H <sub>12</sub> O <sub>2</sub> NF <sub>2</sub> |
|          | 264.0817   | 2.81        | 9.0        | C <sub>12</sub> H <sub>15</sub> ON <sub>4</sub> F <sub>2</sub> |
|          | 264.0813   | 4.45        | 4.0        | C <sub>6</sub> H <sub>12</sub> O <sub>6</sub> N <sub>6</sub>   |

National Center for Organic Mass Spectrometry in Shanghai  
Shanghai Institute of Organic Chemistry  
Chinese Academic of Sciences  
High Resolution MS ESI REPORT

Instrument: Thermo Scientific Q Exactive HF Orbitrap-FTMS

Card Serial Number: E190786

Sample Serial Number: ZXL-10

Operator: Songw Date: 2019/05/29

Operation Mode: ESI Positive Ion Mode

Elemental composition search on mass 264.08

| m/z= 259.08-269.08 |            |             |            |                                                                |
|--------------------|------------|-------------|------------|----------------------------------------------------------------|
| m/z                | Theo. Mass | Delta (ppm) | RDB equiv. | Composition                                                    |
| 264.0825           | 264.0831   | -2.16       | 8.5        | C <sub>14</sub> H <sub>12</sub> O <sub>2</sub> NF <sub>2</sub> |
|                    | 264.0817   | 2.92        | 9.0        | C <sub>12</sub> H <sub>10</sub> ON <sub>4</sub> F <sub>2</sub> |
|                    | 264.0813   | 4.57        | 4.0        | C <sub>6</sub> H <sub>12</sub> O <sub>6</sub> Ne               |

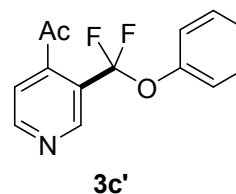

National Center for Organic Mass Spectrometry in Shanghai  
Shanghai Institute of Organic Chemistry  
Chinese Academic of Sciences  
High Resolution MS ESI REPORT

Instrument: Thermo Scientific Q Exactive HF Orbitrap-FTMS

Card Serial Number: E190785

Sample Serial Number: ZXL-11

Operator: Songw Date: 2019/05/29

Operation Mode: ESI Positive Ion Mode

Elemental composition search on mass 278.13

| m/z= 273.13-283.13 |            |             |            |                                                               |
|--------------------|------------|-------------|------------|---------------------------------------------------------------|
| m/z                | Theo. Mass | Delta (ppm) | RDB equiv. | Composition                                                   |
| 278.1345           | 278.1351   | -1.97       | 7.5        | C <sub>16</sub> H <sub>18</sub> ONF <sub>2</sub>              |
|                    | 278.1340   | 2.14        | 11.5       | C <sub>19</sub> H <sub>17</sub> NF                            |
|                    | 278.1338   | 2.86        | 8.0        | C <sub>14</sub> H <sub>16</sub> N <sub>4</sub> F <sub>2</sub> |

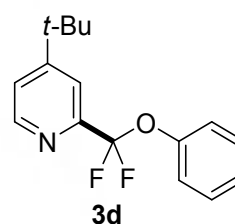

National Center for Organic Mass Spectrometry in Shanghai  
Shanghai Institute of Organic Chemistry  
Chinese Academic of Sciences  
High Resolution MS DATA REPORT

Instrument: Thermo Fisher Scientific LTQ FT Ultra

Card Serial Number : D191542

Sample Serial Number: ZXL-13

Operator : DONG Date: 2019/05/27

Operation Mode: DART POSITIVE

Elemental composition search on mass 298.10

m/z= 293.10-303.10

| m/z      | Theo.<br>Mass | Delta<br>(ppm) | RDB<br>equiv. | Composition                                                                     |
|----------|---------------|----------------|---------------|---------------------------------------------------------------------------------|
| 298.1035 | 298.1036      | -0.36          | 8.0           | C <sub>13</sub> H <sub>13</sub> ON <sub>4</sub> F <sub>3</sub>                  |
|          | 298.1036      | -0.48          | -2.0          | C <sub>7</sub> H <sub>21</sub> O <sub>2</sub> N <sub>4</sub> ClF <sub>2</sub> S |
|          | 298.1033      | 0.49           | 6.0           | C <sub>15</sub> H <sub>19</sub> O <sub>3</sub> FS                               |
|          | 298.1038      | -1.03          | 11.5          | C <sub>18</sub> H <sub>14</sub> ONF <sub>2</sub>                                |
|          | 298.1038      | -1.15          | 1.5           | C <sub>12</sub> H <sub>22</sub> O <sub>2</sub> NClFS                            |
|          | 298.1031      | 1.16           | 2.5           | C <sub>10</sub> H <sub>18</sub> O <sub>3</sub> N <sub>3</sub> F <sub>2</sub> S  |
|          | 298.1038      | -1.20          | 2.0           | C <sub>9</sub> H <sub>19</sub> O <sub>5</sub> N <sub>4</sub> Cl                 |

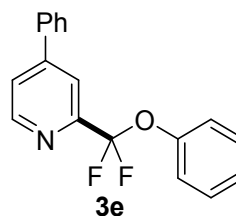

National Center for Organic Mass Spectrometry in Shanghai  
Shanghai Institute of Organic Chemistry  
Chinese Academic of Sciences  
High Resolution ESI- MS REPORT

Instrument: Thermo Scientific Q Exactive HF Orbitrap-FTMS

Card Serial Number: E201006

Sample Serial Number: ZXC-32

Operator: Songw Date: 2020/06/19

Operation Mode: ESI Positive Ion Mode

Elemental composition search on mass 262.10

m/z= 257.10-267.10

| m/z      | Theo.<br>Mass | Delta<br>(ppm) | RDB<br>equiv. | Composition                                                   |
|----------|---------------|----------------|---------------|---------------------------------------------------------------|
| 262.1036 | 262.1038      | -0.83          | 8.5           | C <sub>15</sub> H <sub>14</sub> ONF <sub>2</sub>              |
|          | 262.1027      | 3.53           | 12.5          | C <sub>18</sub> H <sub>13</sub> NF                            |
|          | 262.1025      | 4.29           | 9.0           | C <sub>13</sub> H <sub>12</sub> N <sub>4</sub> F <sub>2</sub> |

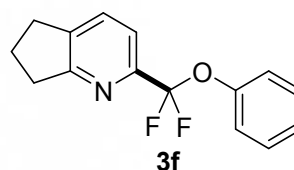

National Center for Organic Mass Spectrometry in Shanghai  
Shanghai Institute of Organic Chemistry  
Chinese Academic of Sciences  
High Resolution MS DATA REPORT

Instrument: Thermo Fisher Scientific LTQ FT Ultra

Card Serial Number : D191541

Sample Serial Number: ZXL-14

Operator : DONG Date: 2019/05/27

Operation Mode: DART POSITIVE

Elemental composition search on mass 250.10

m/z= 245.10-255.10

| m/z      | Theo. Mass | Delta (ppm) | RDB equiv. | Composition                                                                     |
|----------|------------|-------------|------------|---------------------------------------------------------------------------------|
| 250.1036 | 250.1036   | -0.05       | -6.0       | C <sub>3</sub> H <sub>21</sub> O <sub>2</sub> N <sub>4</sub> ClF <sub>2</sub> S |
|          | 250.1036   | 0.09        | 4.0        | C <sub>9</sub> H <sub>13</sub> ON <sub>4</sub> F <sub>3</sub>                   |
|          | 250.1038   | -0.71       | 7.5        | C <sub>14</sub> H <sub>14</sub> ONF <sub>2</sub>                                |
|          | 250.1038   | -0.85       | -2.5       | C <sub>8</sub> H <sub>22</sub> O <sub>2</sub> NClFS                             |
|          | 250.1038   | -0.92       | -2.0       | C <sub>5</sub> H <sub>19</sub> O <sub>5</sub> N <sub>4</sub> Cl                 |
|          | 250.1033   | 1.10        | 2.0        | C <sub>11</sub> H <sub>19</sub> O <sub>3</sub> FS                               |

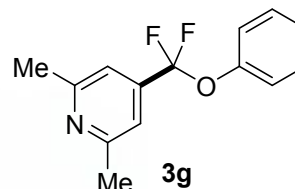

National Center for Organic Mass Spectrometry in Shanghai  
Shanghai Institute of Organic Chemistry  
Chinese Academic of Sciences  
High Resolution MS DATA REPORT

Instrument: Thermo Fisher Scientific LTQ FT Ultra

Card Serial Number : D191540

Sample Serial Number: ZXL-15

Operator : DONG Date: 2019/05/27

Operation Mode: DART POSITIVE

Elemental composition search on mass 223.07

m/z= 218.07-228.07

| m/z      | Theo. Mass | Delta (ppm) | RDB equiv. | Composition                                                       |
|----------|------------|-------------|------------|-------------------------------------------------------------------|
| 223.0676 | 223.0676   | 0.04        | -6.0       | H <sub>16</sub> O <sub>2</sub> N <sub>5</sub> ClF <sub>2</sub> S  |
|          | 223.0675   | 0.20        | 4.0        | C <sub>6</sub> H <sub>8</sub> ON <sub>5</sub> F <sub>3</sub>      |
|          | 223.0677   | -0.70       | 7.5        | C <sub>11</sub> H <sub>9</sub> ON <sub>2</sub> F <sub>2</sub>     |
|          | 223.0678   | -0.86       | -2.5       | C <sub>5</sub> H <sub>17</sub> O <sub>2</sub> N <sub>2</sub> ClFS |
|          | 223.0678   | -0.93       | -2.0       | C <sub>2</sub> H <sub>14</sub> O <sub>5</sub> N <sub>5</sub> Cl   |

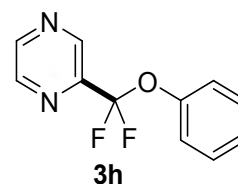



National Center for Organic Mass Spectrometry in Shanghai  
Shanghai Institute of Organic Chemistry  
Chinese Academic of Sciences  
High Resolution MS DATA REPORT

Instrument: Thermo Fisher Scientific LTQ FT Ultra

Card Serial Number : D191539

Sample Serial Number: ZXL-16

Operator : DONG Date: 2019/05/27

Operation Mode: DART POSITIVE

Elemental composition search on mass 223.07

m/z= 218.07-228.07

| m/z      | Theo.<br>Mass | Delta<br>(ppm) | RDB<br>equiv. | Composition                                                       |
|----------|---------------|----------------|---------------|-------------------------------------------------------------------|
| 223.0676 | 223.0676      | -0.05          | -6.0          | H <sub>16</sub> O <sub>2</sub> N <sub>5</sub> ClF <sub>2</sub> S  |
|          | 223.0675      | 0.11           | 4.0           | C <sub>6</sub> H <sub>8</sub> ON <sub>5</sub> F <sub>3</sub>      |
|          | 223.0677      | -0.79          | 7.5           | C <sub>11</sub> H <sub>9</sub> ON <sub>2</sub> F <sub>2</sub>     |
|          | 223.0678      | -0.95          | -2.5          | C <sub>5</sub> H <sub>17</sub> O <sub>2</sub> N <sub>2</sub> ClFS |
|          | 223.0678      | -1.02          | -2.0          | C <sub>2</sub> H <sub>14</sub> O <sub>5</sub> N <sub>5</sub> Cl   |

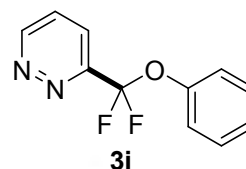

National Center for Organic Mass Spectrometry in Shanghai  
Shanghai Institute of Organic Chemistry  
Chinese Academic of Sciences  
High Resolution MS DATA REPORT

Instrument: Thermo Fisher Scientific LTQ FT Ultra

Card Serial Number : D191536

Sample Serial Number: ZXL-19

Operator : DONG Date: 2019/05/27

Operation Mode: DART POSITIVE

Elemental composition search on mass 273.08

m/z= 268.08-278.08

| m/z      | Theo.<br>Mass | Delta<br>(ppm) | RDB<br>equiv. | Composition                                                                     |
|----------|---------------|----------------|---------------|---------------------------------------------------------------------------------|
| 273.0832 | 273.0832      | 0.01           | 7.0           | C <sub>10</sub> H <sub>10</sub> ON <sub>5</sub> F <sub>3</sub>                  |
|          | 273.0832      | -0.11          | -3.0          | C <sub>4</sub> H <sub>18</sub> O <sub>2</sub> N <sub>5</sub> ClF <sub>2</sub> S |
|          | 273.0834      | -0.72          | 10.5          | C <sub>15</sub> H <sub>11</sub> ON <sub>2</sub> F <sub>2</sub>                  |
|          | 273.0834      | -0.85          | 0.5           | C <sub>9</sub> H <sub>19</sub> O <sub>2</sub> N <sub>2</sub> ClFS               |
|          | 273.0834      | -0.91          | 1.0           | C <sub>6</sub> H <sub>16</sub> O <sub>5</sub> N <sub>5</sub> Cl                 |

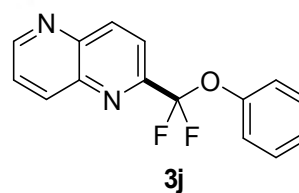

National Center for Organic Mass Spectrometry in Shanghai  
Shanghai Institute of Organic Chemistry  
Chinese Academic of Sciences  
High Resolution MS DATA REPORT

Instrument: Thermo Fisher Scientific LTQ FT Ultra

Card Serial Number : D191538

Sample Serial Number: ZXL-17

Operator : DONG

Date: 2019/05/27

Operation Mode: DART POSITIVE

Elemental composition search on mass 322.10

m/z= 317.10-327.10

| m/z      | Theo. Mass | Delta (ppm) | RDB equiv. | Composition                                                                     |
|----------|------------|-------------|------------|---------------------------------------------------------------------------------|
| 322.1034 | 322.1033   | 0.30        | 8.0        | C <sub>17</sub> H <sub>19</sub> O <sub>3</sub> F <sub>3</sub> S                 |
|          | 322.1036   | -0.49       | 10.0       | C <sub>15</sub> H <sub>13</sub> ON <sub>4</sub> F <sub>3</sub>                  |
|          | 322.1036   | -0.60       | 0.0        | C <sub>9</sub> H <sub>21</sub> O <sub>2</sub> N <sub>4</sub> ClF <sub>2</sub> S |
|          | 322.1031   | 0.92        | 4.5        | C <sub>12</sub> H <sub>18</sub> O <sub>3</sub> N <sub>3</sub> F <sub>2</sub> S  |
|          | 322.1038   | -1.11       | 13.5       | C <sub>20</sub> H <sub>14</sub> ONF <sub>2</sub>                                |
|          | 322.1038   | -1.22       | 3.5        | C <sub>14</sub> H <sub>22</sub> O <sub>2</sub> NClFS                            |
|          | 322.1038   | -1.27       | 4.0        | C <sub>11</sub> H <sub>19</sub> O <sub>5</sub> N <sub>4</sub> Cl                |

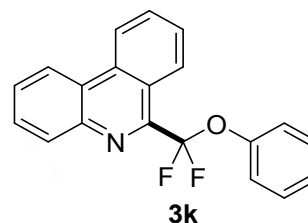

National Center for Organic Mass Spectrometry in Shanghai  
Shanghai Institute of Organic Chemistry  
Chinese Academic of Sciences  
High Resolution MS DATA REPORT

Instrument: Thermo Fisher Scientific LTQ FT Ultra

Card Serial Number : D191537

Sample Serial Number: ZXL-18

Operator : DONG

Date: 2019/05/27

Operation Mode: DART POSITIVE

Elemental composition search on mass 289.07

m/z= 284.07-294.07

| m/z      | Theo. Mass | Delta (ppm) | RDB equiv. | Composition                                                                     |
|----------|------------|-------------|------------|---------------------------------------------------------------------------------|
| 289.0669 | 289.0669   | -0.01       | -3.0       | C <sub>5</sub> H <sub>13</sub> O <sub>4</sub> N <sub>3</sub> ClF <sub>2</sub> S |
|          | 289.0669   | 0.11        | 7.0        | C <sub>11</sub> H <sub>10</sub> O <sub>3</sub> N <sub>3</sub> F <sub>3</sub>    |
|          | 289.0668   | 0.31        | 14.0       | C <sub>17</sub> H <sub>21</sub> N <sub>3</sub> S                                |
|          | 289.0671   | -0.58       | 10.5       | C <sub>16</sub> H <sub>11</sub> O <sub>3</sub> F <sub>2</sub>                   |
|          | 289.0671   | -0.70       | 0.5        | C <sub>10</sub> H <sub>19</sub> O <sub>4</sub> ClFS                             |

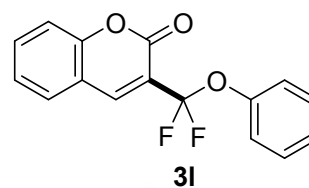

National Center for Organic Mass Spectrometry in Shanghai  
Shanghai Institute of Organic Chemistry  
Chinese Academic of Sciences  
High Resolution MS ESI REPORT

Instrument: Thermo Scientific Q Exactive HF Orbitrap-FTMS

Card Serial Number: E190792

Sample Serial Number: ZXL-1

Operator: Songw Date: 2019/05/29

Operation Mode: ESI Positive Ion Mode

Elemental composition search on mass 323.05

| m/z      | Theo. Mass | Delta (ppm) | RDB equiv. | Composition                                                                    |
|----------|------------|-------------|------------|--------------------------------------------------------------------------------|
| 323.0483 | 323.0477   | 1.86        | 12.0       | C <sub>15</sub> H <sub>8</sub> O <sub>2</sub> N <sub>3</sub> F <sub>2</sub> Na |
|          | 323.0490   | -2.30       | 11.5       | C <sub>17</sub> H <sub>10</sub> O <sub>3</sub> F <sub>2</sub> Na               |
|          | 323.0474   | 2.71        | 10.5       | C <sub>14</sub> H <sub>9</sub> O <sub>5</sub> N <sub>2</sub> F <sub>2</sub>    |

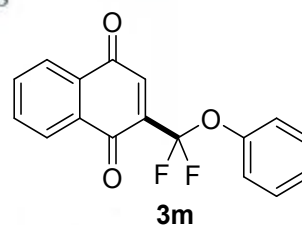

National Center for Organic Mass Spectrometry in Shanghai  
Shanghai Institute of Organic Chemistry  
Chinese Academic of Sciences  
High Resolution MS ESI REPORT

Instrument: Thermo Scientific Q Exactive HF Orbitrap-FTMS

Card Serial Number: E190790

Sample Serial Number: ZXL-5

Operator: Songw Date: 2019/05/29

Operation Mode: ESI Positive Ion Mode

Elemental composition search on mass 379.11

| m/z      | Theo. Mass | Delta (ppm) | RDB equiv. | Composition                                                                     |
|----------|------------|-------------|------------|---------------------------------------------------------------------------------|
| 379.1109 | 379.1103   | 1.72        | 12.0       | C <sub>19</sub> H <sub>16</sub> O <sub>2</sub> N <sub>3</sub> F <sub>2</sub> Na |
|          | 379.1116   | -1.83       | 11.5       | C <sub>21</sub> H <sub>18</sub> O <sub>3</sub> F <sub>2</sub> Na                |
|          | 379.1100   | 2.44        | 10.5       | C <sub>18</sub> H <sub>17</sub> O <sub>5</sub> N <sub>2</sub> F <sub>2</sub>    |
|          | 379.1127   | -4.63       | 15.0       | C <sub>21</sub> H <sub>15</sub> O <sub>2</sub> N <sub>3</sub> F <sub>2</sub>    |
|          | 379.1091   | 4.73        | 16.0       | C <sub>22</sub> H <sub>15</sub> ON <sub>3</sub> FNa                             |

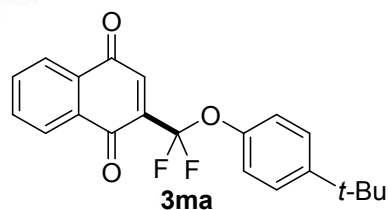

National Center for Organic Mass Spectrometry in Shanghai  
Shanghai Institute of Organic Chemistry  
Chinese Academic of Sciences  
High Resolution MS ESI REPORT

Instrument: Thermo Scientific Q Exactive HF Orbitrap-FTMS

Card Serial Number: E190792

Sample Serial Number: ZXL-2

Operator: Songw

Date: 2019/05/29

Operation Mode: ESI Positive Ion Mode

Elemental composition search on mass 341.04

m/z= 336.04-346.04

| m/z      | Theo. Mass | Delta (ppm) | RDB equiv. | Composition                                                                    |
|----------|------------|-------------|------------|--------------------------------------------------------------------------------|
| 341.0391 | 341.0396   | -1.58       | 11.5       | C <sub>17</sub> H <sub>9</sub> O <sub>3</sub> F <sub>3</sub> Na                |
|          | 341.0383   | 2.35        | 12.0       | C <sub>15</sub> H <sub>7</sub> O <sub>2</sub> N <sub>3</sub> F <sub>3</sub> Na |
|          | 341.0380   | 3.04        | 10.5       | C <sub>14</sub> H <sub>10</sub> O <sub>7</sub> N <sub>2</sub> Na               |
|          | 341.0380   | 3.16        | 10.5       | C <sub>14</sub> H <sub>8</sub> O <sub>5</sub> N <sub>2</sub> F <sub>3</sub>    |
|          | 341.0404   | -4.01       | 13.5       | C <sub>16</sub> H <sub>9</sub> O <sub>7</sub> N <sub>2</sub>                   |
|          | 341.0407   | -4.70       | 15.0       | C <sub>17</sub> H <sub>6</sub> O <sub>2</sub> N <sub>3</sub> F <sub>3</sub>    |
|          | 341.0407   | -4.81       | 15.0       | C <sub>17</sub> H <sub>8</sub> O <sub>4</sub> N <sub>3</sub> Na                |

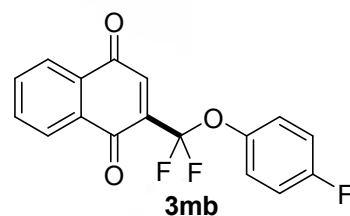

National Center for Organic Mass Spectrometry in Shanghai  
Shanghai Institute of Organic Chemistry  
Chinese Academic of Sciences  
High Resolution EI-MS REPORT

Instrument: Waters Premier GC-TOF MS

Operation Mode: EI Positive Ion Mode

(Electron Energy: 70eV)

Card Serial Number: GCT-P-T20-06-1274

Sample Serial Number: 2013067-ZXL-33

Operator: Li

Date:

2020/06/19

| m/z      | Theo. Mass | Delta (ppm) | RDB equiv. | Composition                                                                     |
|----------|------------|-------------|------------|---------------------------------------------------------------------------------|
| 334.0204 | 334.0203   | 0.36        | 12.0       | C <sub>17</sub> H <sub>9</sub> O <sub>3</sub> ClF <sub>2</sub>                  |
|          | 334.0207   | -0.83       | 16.0       | C <sub>18</sub> H <sub>7</sub> O <sub>2</sub> N <sub>2</sub> FS                 |
|          | 334.0208   | -1.11       | -1.0       | C <sub>6</sub> H <sub>14</sub> O <sub>6</sub> N <sub>2</sub> ClF <sub>3</sub> S |
|          | 334.0196   | 2.31        | 3.0        | C <sub>9</sub> H <sub>13</sub> O <sub>5</sub> N <sub>2</sub> ClF <sub>2</sub> S |
|          | 334.0196   | 2.42        | 13.0       | C <sub>15</sub> H <sub>5</sub> O <sub>4</sub> N <sub>2</sub> F <sub>3</sub>     |

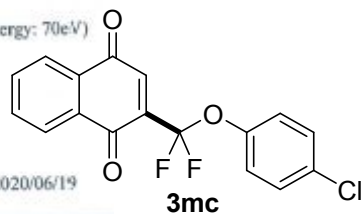



National Center for Organic Mass Spectrometry in Shanghai  
Shanghai Institute of Organic Chemistry  
Chinese Academic of Sciences  
High Resolution EI-MS REPORT

Instrument: Waters Premier GC-TOF MS  
Operation Mode: EI Positive Ion Mode (Electron Energy: 70eV)  
Card Serial Number: GCT-P-T20-06-1275  
Sample Serial Number: 2013067-ZXL-34  
Operator: Li Date: 2020/06/19

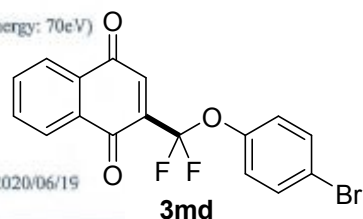

| m/z      | Theo. Mass | Delta (ppm) | RDB equiv. | Composition                                                                     |
|----------|------------|-------------|------------|---------------------------------------------------------------------------------|
| 377.9694 | 377.9694   | 0.02        | 23.0       | C <sub>22</sub> O <sub>2</sub> N <sub>2</sub> F <sub>2</sub> S                  |
|          | 377.9691   | 0.76        | 3.0        | C <sub>9</sub> H <sub>13</sub> O <sub>5</sub> N <sub>2</sub> BrF <sub>2</sub> S |
|          | 377.9691   | 0.77        | 11.5       | C <sub>17</sub> H <sub>11</sub> ONBrClF                                         |
|          | 377.9698   | -0.96       | 12.0       | C <sub>17</sub> H <sub>9</sub> O <sub>3</sub> BrF <sub>2</sub>                  |
|          | 377.9698   | -1.06       | 2.0        | C <sub>11</sub> H <sub>17</sub> O <sub>4</sub> BrClFS                           |

National Center for Organic Mass Spectrometry in Shanghai  
Shanghai Institute of Organic Chemistry  
Chinese Academic of Sciences  
High Resolution MS ESI REPORT

Instrument: Thermo Scientific Q Exactive HF Orbitrap-FTMS

Card Serial Number: E190791

Sample Serial Number: ZXL-6

Operator: Songw Date: 2019/05/29

Operation Mode: ESI Positive Ion Mode

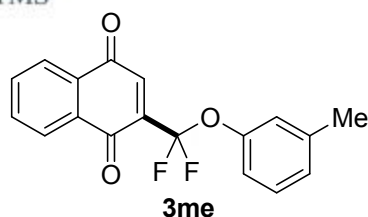

Elemental composition search on mass 337.06

| m/z      | Theo. Mass | Delta (ppm) | RDB equiv. | Composition                                                                     |
|----------|------------|-------------|------------|---------------------------------------------------------------------------------|
| 337.0641 | 337.0647   | -1.73       | 11.5       | C <sub>18</sub> H <sub>12</sub> O <sub>3</sub> F <sub>2</sub> Na                |
|          | 337.0633   | 2.26        | 12.0       | C <sub>16</sub> H <sub>10</sub> O <sub>2</sub> N <sub>3</sub> F <sub>2</sub> Na |
|          | 337.0631   | 3.07        | 10.5       | C <sub>15</sub> H <sub>13</sub> O <sub>5</sub> N <sub>2</sub> F <sub>2</sub>    |
|          | 337.0657   | -4.88       | 15.0       | C <sub>18</sub> H <sub>9</sub> O <sub>2</sub> N <sub>3</sub> F <sub>2</sub>     |

National Center for Organic Mass Spectrometry in Shanghai  
Shanghai Institute of Organic Chemistry  
Chinese Academic of Sciences  
High Resolution MS DATA REPORT

Instrument: Thermo Fisher Scientific LTQ FT Ultra

Card Serial Number : D191535

Sample Serial Number: ZXL-20

Operator : DONG Date: 2019/05/27

Operation Mode: DART POSITIVE

Elemental composition search on mass 310.07

m/z= 305.07-315.07

| m/z      | Theo. Mass | Delta (ppm) | RDB equiv. | Composition                                                                    |
|----------|------------|-------------|------------|--------------------------------------------------------------------------------|
| 310.0706 | 310.0706   | 0.12        | 5.0        | C <sub>10</sub> H <sub>13</sub> O <sub>2</sub> N <sub>4</sub> F <sub>3</sub> S |
|          | 310.0708   | -0.52       | 8.5        | C <sub>15</sub> H <sub>14</sub> O <sub>2</sub> NF <sub>2</sub> S               |
|          | 310.0708   | -0.58       | 9.0        | C <sub>12</sub> H <sub>11</sub> O <sub>5</sub> N <sub>4</sub> F                |
|          | 310.0710   | -1.22       | 12.5       | C <sub>17</sub> H <sub>12</sub> O <sub>5</sub> N                               |
|          | 310.0711   | -1.45       | 0.5        | C <sub>7</sub> H <sub>16</sub> ON <sub>5</sub> ClF <sub>3</sub> S              |

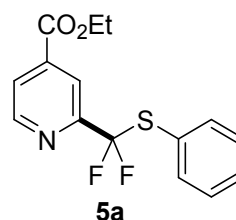

National Center for Organic Mass Spectrometry in Shanghai  
Shanghai Institute of Organic Chemistry  
Chinese Academic of Sciences  
High Resolution MS DATA REPORT

Instrument: Thermo Fisher Scientific LTQ FT Ultra

Card Serial Number : D191529

Sample Serial Number: ZXL-26

Operator : DONG Date: 2019/05/27

Operation Mode: DART POSITIVE

Elemental composition search on mass 263.04

m/z= 258.04-268.04

| m/z      | Theo. Mass | Delta (ppm) | RDB equiv. | Composition                                                      |
|----------|------------|-------------|------------|------------------------------------------------------------------|
| 263.0448 | 263.0449   | -0.35       | 9.5        | C <sub>13</sub> H <sub>9</sub> N <sub>2</sub> F <sub>2</sub> S   |
|          | 263.0449   | -0.41       | 10.0       | C <sub>10</sub> H <sub>6</sub> O <sub>3</sub> N <sub>5</sub> F   |
|          | 263.0450   | -0.55       | 0.0        | C <sub>4</sub> H <sub>14</sub> O <sub>4</sub> N <sub>5</sub> ClS |
|          | 263.0451   | -1.17       | 13.5       | C <sub>15</sub> H <sub>7</sub> O <sub>3</sub> N <sub>2</sub>     |

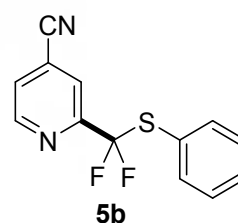

National Center for Organic Mass Spectrometry in Shanghai  
Shanghai Institute of Organic Chemistry  
Chinese Academic of Sciences  
High Resolution MS DATA REPORT

Instrument: Thermo Fisher Scientific LTQ FT Ultra

Card Serial Number : D191528

Sample Serial Number: ZXL-27

Operator : DONG Date: 2019/05/27

Operation Mode: DART POSITIVE

Elemental composition search on mass 280.06

| m/z= 275.06-285.06 |            |             |            |                                                                  |
|--------------------|------------|-------------|------------|------------------------------------------------------------------|
| m/z                | Theo. Mass | Delta (ppm) | RDB equiv. | Composition                                                      |
| 280.0600           | 280.0602   | -0.74       | 8.5        | C <sub>14</sub> H <sub>12</sub> ONF <sub>2</sub> S               |
|                    | 280.0602   | -0.80       | 9.0        | C <sub>11</sub> H <sub>9</sub> O <sub>4</sub> N <sub>4</sub> F   |
|                    | 280.0603   | -0.93       | -1.0       | C <sub>5</sub> H <sub>17</sub> O <sub>5</sub> N <sub>4</sub> ClS |
|                    | 280.0604   | -1.52       | 12.5       | C <sub>16</sub> H <sub>10</sub> O <sub>4</sub> N                 |

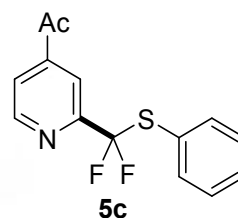

National Center for Organic Mass Spectrometry in Shanghai  
Shanghai Institute of Organic Chemistry  
Chinese Academic of Sciences  
High Resolution ESI- MS REPORT

Instrument: Thermo Scientific Q Exactive HF Orbitrap-FTMS

Card Serial Number: E201007

Sample Serial Number: ZXC-35

Operator: Songw Date: 2020/06/19

Operation Mode: ESI Positive Ion Mode

Elemental composition search on mass 280.06

| m/z= 275.06-285.06 |            |             |            |                                                    |
|--------------------|------------|-------------|------------|----------------------------------------------------|
| m/z                | Theo. Mass | Delta (ppm) | RDB equiv. | Composition                                        |
| 280.0600           | 280.0602   | -0.88       | 8.5        | C <sub>14</sub> H <sub>12</sub> ONF <sub>2</sub> S |
|                    | 280.0604   | -1.66       | 12.5       | C <sub>16</sub> H <sub>10</sub> O <sub>4</sub> N   |
|                    | 280.0591   | 3.20        | 12.5       | C <sub>17</sub> H <sub>11</sub> NFS                |

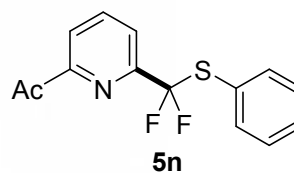

National Center for Organic Mass Spectrometry in Shanghai  
Shanghai Institute of Organic Chemistry  
Chinese Academic of Sciences  
High Resolution MS DATA REPORT

Instrument: Thermo Fisher Scientific LTQ FT Ultra

Card Serial Number : D191527

Sample Serial Number: ZXL-28

Operator : DONG

Date: 2019/05/27

Operation Mode: DART POSITIVE

Elemental composition search on mass 302.08

| m/z= 297.08-307.08 |            |             |            |                                                                  |
|--------------------|------------|-------------|------------|------------------------------------------------------------------|
| m/z                | Theo. Mass | Delta (ppm) | RDB equiv. | Composition                                                      |
| 302.0807           | 302.0805   | 0.60        | 5.5        | C <sub>11</sub> H <sub>16</sub> O <sub>5</sub> N <sub>3</sub> S  |
|                    | 302.0810   | -0.84       | 10.5       | C <sub>17</sub> H <sub>14</sub> NF <sub>2</sub> S                |
|                    | 302.0810   | -0.89       | 11.0       | C <sub>14</sub> H <sub>11</sub> O <sub>3</sub> N <sub>4</sub> F  |
|                    | 302.0810   | -1.01       | 1.0        | C <sub>8</sub> H <sub>19</sub> O <sub>4</sub> N <sub>4</sub> ClS |
|                    | 302.0803   | 1.28        | 10.5       | C <sub>14</sub> H <sub>13</sub> ON <sub>5</sub> Cl               |

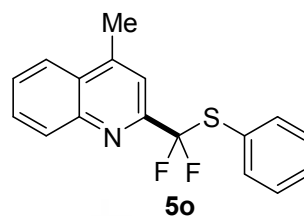

National Center for Organic Mass Spectrometry in Shanghai  
Shanghai Institute of Organic Chemistry  
Chinese Academic of Sciences  
High Resolution MS DATA REPORT

Instrument: Thermo Fisher Scientific LTQ FT Ultra

Card Serial Number : D191526

Sample Serial Number: ZXL-29

Operator : DONG

Date: 2019/05/27

Operation Mode: DART POSITIVE

Elemental composition search on mass 239.04

| m/z= 234.04-244.04 |            |             |            |                                                                  |
|--------------------|------------|-------------|------------|------------------------------------------------------------------|
| m/z                | Theo. Mass | Delta (ppm) | RDB equiv. | Composition                                                      |
| 239.0447           | 239.0449   | -0.89       | 7.5        | C <sub>11</sub> H <sub>9</sub> N <sub>2</sub> F <sub>2</sub> S   |
|                    | 239.0445   | 0.93        | 2.5        | C <sub>5</sub> H <sub>11</sub> O <sub>5</sub> N <sub>4</sub> S   |
|                    | 239.0449   | -0.96       | 8.0        | C <sub>8</sub> H <sub>6</sub> O <sub>3</sub> N <sub>5</sub> F    |
|                    | 239.0450   | -1.10       | -2.0       | C <sub>2</sub> H <sub>14</sub> O <sub>4</sub> N <sub>5</sub> ClS |
|                    | 239.0451   | -1.79       | 11.5       | C <sub>13</sub> H <sub>7</sub> O <sub>3</sub> N <sub>2</sub>     |

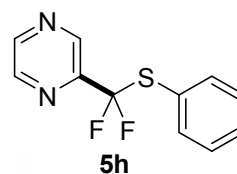



National Center for Organic Mass Spectrometry in Shanghai  
Shanghai Institute of Organic Chemistry  
Chinese Academic of Sciences  
High Resolution MS DATA REPORT

Instrument: Thermo Fisher Scientific LTQ FT Ultra

Card Serial Number : D191524

Sample Serial Number: ZXL-31

Operator : DONG

Date: 2019/05/27

Operation Mode: DART POSITIVE

Elemental composition search on mass 273.01

| m/z      | Theo. Mass | Delta (ppm) | RDB equiv. | Composition                                                      |
|----------|------------|-------------|------------|------------------------------------------------------------------|
| 273.0057 | 273.0057   | 0.15        | 16.0       | C <sub>15</sub> H <sub>3</sub> O <sub>4</sub> N                  |
|          | 273.0055   | 0.75        | 2.5        | C <sub>5</sub> H <sub>10</sub> O <sub>5</sub> N <sub>4</sub> ClS |
|          | 273.0059   | -0.84       | 7.5        | C <sub>11</sub> H <sub>8</sub> N <sub>2</sub> ClF <sub>2</sub> S |
|          | 273.0055   | 0.88        | 12.5       | C <sub>11</sub> H <sub>2</sub> O <sub>4</sub> N <sub>4</sub> F   |
|          | 273.0059   | -0.90       | 8.0        | C <sub>8</sub> H <sub>5</sub> O <sub>3</sub> N <sub>5</sub> ClF  |
|          | 273.0054   | 0.94        | 12.0       | C <sub>14</sub> H <sub>5</sub> ONF <sub>2</sub> S                |

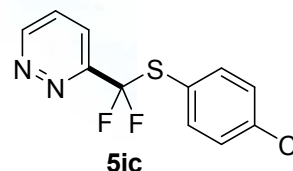

National Center for Organic Mass Spectrometry in Shanghai  
Shanghai Institute of Organic Chemistry  
Chinese Academic of Sciences  
High Resolution MS DATA REPORT

Instrument: Thermo Fisher Scientific LTQ FT Ultra

Card Serial Number : D191525

Sample Serial Number: ZXL-30

Operator : DONG

Date: 2019/05/27

Operation Mode: DART POSITIVE

Elemental composition search on mass 372.04

| m/z      | Theo. Mass | Delta (ppm) | RDB equiv. | Composition                                                       |
|----------|------------|-------------|------------|-------------------------------------------------------------------|
| 372.0416 | 372.0415   | 0.15        | 8.5        | C <sub>14</sub> H <sub>15</sub> O <sub>5</sub> N <sub>3</sub> ClS |
|          | 372.0415   | 0.24        | 18.5       | C <sub>20</sub> H <sub>7</sub> O <sub>4</sub> N <sub>3</sub> F    |
|          | 372.0415   | 0.29        | 18.0       | C <sub>23</sub> H <sub>10</sub> OF <sub>2</sub> S                 |
|          | 372.0417   | -0.30       | 22.0       | C <sub>25</sub> H <sub>8</sub> O <sub>4</sub>                     |
|          | 372.0420   | -1.02       | 13.5       | C <sub>20</sub> H <sub>13</sub> NClF <sub>2</sub> S               |
|          | 372.0420   | -1.07       | 14.0       | C <sub>17</sub> H <sub>10</sub> O <sub>3</sub> N <sub>4</sub> ClF |

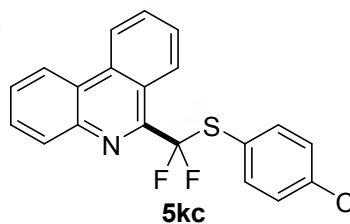

National Center for Organic Mass Spectrometry in Shanghai  
Shanghai Institute of Organic Chemistry  
Chinese Academic of Sciences  
High Resolution ESI- MS REPORT

Instrument: Thermo Scientific Q Exactive HF Orbitrap-FTMS

Card Serial Number: E201008

Sample Serial Number: ZXC-36

Operator: Songw Date: 2020/06/19

Operation Mode: ESI Positive Ion Mode

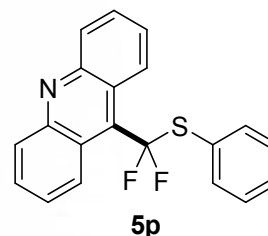

Elemental composition search on mass 338.08

m/z= 333.08-343.08

| m/z      | Theo. Mass | Delta (ppm) | RDB equiv. | Composition                                       |
|----------|------------|-------------|------------|---------------------------------------------------|
| 338.0808 | 338.0810   | -0.42       | 13.5       | C <sub>20</sub> H <sub>14</sub> NF <sub>2</sub> S |
|          | 338.0812   | -1.06       | 17.5       | C <sub>22</sub> H <sub>12</sub> O <sub>3</sub> N  |
|          | 338.0823   | -4.44       | 13.5       | C <sub>19</sub> H <sub>13</sub> O <sub>4</sub> NF |

National Center for Organic Mass Spectrometry in Shanghai  
Shanghai Institute of Organic Chemistry  
Chinese Academic of Sciences  
High Resolution MS DATA REPORT

Instrument: Thermo Fisher Scientific LTQ FT Ultra

Card Serial Number : D191534

Sample Serial Number: ZXL-21

Operator : DONG Date: 2019/05/27

Operation Mode: DART POSITIVE

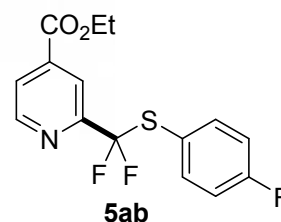

Elemental composition search on mass 328.06

m/z= 323.06-333.06

| m/z      | Theo. Mass | Delta (ppm) | RDB equiv. | Composition                                                                  |
|----------|------------|-------------|------------|------------------------------------------------------------------------------|
| 328.0611 | 328.0609   | 0.67        | 12.0       | C <sub>17</sub> H <sub>13</sub> O <sub>3</sub> N <sub>2</sub> Cl             |
|          | 328.0614   | -0.67       | 8.5        | C <sub>15</sub> H <sub>13</sub> O <sub>2</sub> NF <sub>3</sub> S             |
|          | 328.0614   | -0.72       | 9.0        | C <sub>12</sub> H <sub>10</sub> O <sub>5</sub> N <sub>4</sub> F <sub>2</sub> |
|          | 328.0607   | 1.28        | 8.5        | C <sub>12</sub> H <sub>12</sub> O <sub>3</sub> N <sub>5</sub> ClF            |
|          | 328.0607   | 1.33        | 8.0        | C <sub>15</sub> H <sub>15</sub> N <sub>2</sub> ClF <sub>2</sub> S            |

National Center for Organic Mass Spectrometry in Shanghai  
Shanghai Institute of Organic Chemistry  
Chinese Academic of Sciences  
High Resolution MS DATA REPORT

Instrument: Thermo Fisher Scientific LTQ FT Ultra

Card Serial Number : D191533

Sample Serial Number: ZXL-22

Operator : DONG Date: 2019/05/27

Operation Mode: DART POSITIVE

Elemental composition search on mass 344.03

| m/z= 339.03-349.03 |            |             |            |                                                                    |
|--------------------|------------|-------------|------------|--------------------------------------------------------------------|
| m/z                | Theo. Mass | Delta (ppm) | RDB equiv. | Composition                                                        |
| 344.0317           | 344.0318   | -0.32       | 8.5        | C <sub>15</sub> H <sub>13</sub> O <sub>2</sub> NClF <sub>2</sub> S |
|                    | 344.0318   | -0.37       | 9.0        | C <sub>12</sub> H <sub>10</sub> O <sub>5</sub> N <sub>4</sub> ClF  |
|                    | 344.0320   | -0.95       | 12.5       | C <sub>17</sub> H <sub>11</sub> O <sub>5</sub> NCl                 |
|                    | 344.0313   | 1.10        | 13.0       | C <sub>18</sub> H <sub>10</sub> O <sub>3</sub> F <sub>2</sub> S    |

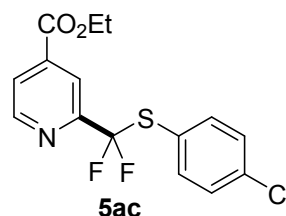

National Center for Organic Mass Spectrometry in Shanghai  
Shanghai Institute of Organic Chemistry  
Chinese Academic of Sciences  
High Resolution MS DATA REPORT

Instrument: Thermo Fisher Scientific LTQ FT Ultra

Card Serial Number : D191532

Sample Serial Number: ZXL-23

Operator : DONG Date: 2019/05/27

Operation Mode: DART POSITIVE

Elemental composition search on mass 387.98

| m/z= 382.98-392.98 |            |             |            |                                                                               |
|--------------------|------------|-------------|------------|-------------------------------------------------------------------------------|
| m/z                | Theo. Mass | Delta (ppm) | RDB equiv. | Composition                                                                   |
| 387.9809           | 387.9807   | 0.39        | 19.5       | C <sub>21</sub> H <sub>4</sub> O <sub>4</sub> NClF                            |
|                    | 387.9807   | 0.60        | 8.5        | C <sub>12</sub> H <sub>12</sub> O <sub>3</sub> N <sub>5</sub> BrCl            |
|                    | 387.9811   | -0.64       | 23.5       | C <sub>22</sub> H <sub>2</sub> O <sub>3</sub> N <sub>3</sub> S                |
|                    | 387.9806   | 0.65        | 8.0        | C <sub>15</sub> H <sub>15</sub> N <sub>2</sub> BrClFS                         |
|                    | 387.9805   | 0.90        | 16.0       | C <sub>16</sub> H <sub>3</sub> O <sub>4</sub> N <sub>4</sub> ClF <sub>2</sub> |

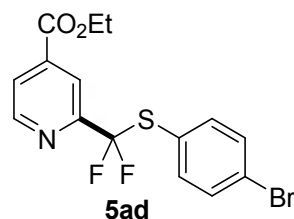

National Center for Organic Mass Spectrometry in Shanghai  
Shanghai Institute of Organic Chemistry  
Chinese Academic of Sciences  
High Resolution MS DATA REPORT

Instrument: Thermo Fisher Scientific LTQ FT Ultra

Card Serial Number : D191531

Sample Serial Number: ZXL-24

Operator : DONG Date: 2019/05/27

Operation Mode: DART POSITIVE

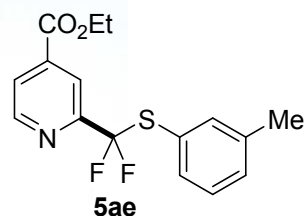

Elemental composition search on mass 324.09

m/z= 319.09-329.09

| m/z      | Theo. Mass | Delta (ppm) | RDB equiv. | Composition                                                      |
|----------|------------|-------------|------------|------------------------------------------------------------------|
| 324.0863 | 324.0864   | -0.35       | 8.5        | C <sub>16</sub> H <sub>16</sub> O <sub>2</sub> NF <sub>2</sub> S |
|          | 324.0864   | -0.40       | 9.0        | C <sub>13</sub> H <sub>13</sub> O <sub>5</sub> N <sub>4</sub> F  |
|          | 324.0866   | -1.02       | 12.5       | C <sub>18</sub> H <sub>14</sub> O <sub>5</sub> N                 |
|          | 324.0858   | 1.62        | 8.5        | C <sub>13</sub> H <sub>15</sub> O <sub>3</sub> N <sub>5</sub> Cl |
|          | 324.0858   | 1.68        | 8.0        | C <sub>16</sub> H <sub>18</sub> N <sub>2</sub> ClFS              |

National Center for Organic Mass Spectrometry in Shanghai  
Shanghai Institute of Organic Chemistry  
Chinese Academic of Sciences  
High Resolution MS DATA REPORT

Instrument: Thermo Fisher Scientific LTQ FT Ultra

Card Serial Number : D191530

Sample Serial Number: ZXL-25

Operator : DONG Date: 2019/05/27

Operation Mode: DART POSITIVE

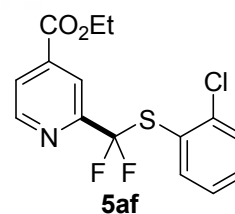

Elemental composition search on mass 344.03

m/z= 339.03-349.03

| m/z      | Theo. Mass | Delta (ppm) | RDB equiv. | Composition                                                        |
|----------|------------|-------------|------------|--------------------------------------------------------------------|
| 344.0315 | 344.0313   | 0.46        | 13.0       | C <sub>18</sub> H <sub>10</sub> O <sub>3</sub> F <sub>2</sub> S    |
|          | 344.0318   | -0.96       | 8.5        | C <sub>15</sub> H <sub>13</sub> O <sub>2</sub> NClF <sub>2</sub> S |
|          | 344.0318   | -1.01       | 9.0        | C <sub>12</sub> H <sub>10</sub> O <sub>5</sub> N <sub>4</sub> ClF  |
|          | 344.0320   | -1.59       | 12.5       | C <sub>17</sub> H <sub>11</sub> O <sub>5</sub> NCl                 |
